# Supplementary material for: Palladium-catalyzed [4 + 2] cycloaddition of 2-methylidenetrimethylene carbonate or methylene cyclic carbamate with sulfamate-derived cyclic imines
Source: Royal Society of Chemistry journal article supplement (doi:10.1039/d3ob01361h), 2023-01-01
Supplement: d3ob01361h1.pdf [file d3ob01361h1.pdf]

## Supporting Information

# Palladium-Catalyzed [4+2] Cycloaddition of 2-Methylidenetrimethylene Carbonate or Methylene cyclic carbamate with Sulfamate-Derived Cyclic Imines

Li Sun,<sup>‡a</sup> Jiyu Li,<sup>‡a</sup> Yafei Wu,<sup>a</sup> Ying Li,<sup>a</sup> Junqi Chen,<sup>a</sup> Xiaoye Xia,<sup>a</sup> Chunhao Yuan,<sup>c</sup> Hongchao Guo<sup>\*b</sup> and Biming Mao<sup>\*a</sup>

<sup>a</sup> School of Pharmaceutical Sciences & Institute of Materia Medica, Shandong First Medical University & Shandong Academy of Medical Sciences, Jinan 250117, Shandong, P. R. China. E-mail: [maobiming@sdfmu.edu.cn](mailto:maobiming@sdfmu.edu.cn)

<sup>b</sup> Department of Applied Chemistry, China Agricultural University, Beijing 100193, China. E-mail: [hchguo@cau.edu.cn](mailto:hchguo@cau.edu.cn)

<sup>c</sup> School of Chemistry and Pharmaceutical Engineering, Shandong First Medical University, Shandong Academy of Medical Sciences, Taian 271016, Shandong, P. R. China.

<sup>‡</sup>These authors contributed equally to this work.

### Table of Contents

|                                                                                 |     |
|---------------------------------------------------------------------------------|-----|
| General Information                                                             | S2  |
| General Procedure for Preparation of [4+2] Products                             | S2  |
| Characterization Data of the Products <b>3</b> , <b>5</b>                       | S3  |
| Scaled-up Synthesis of the Product <b>3aa</b> and <b>5aa</b>                    | S15 |
| Transformations of the Product <b>3aa</b> and <b>5aa</b>                        | S16 |
| <sup>1</sup> H, <sup>13</sup> C and <sup>19</sup> F NMR Spectra of All Products | S18 |
| X-Ray Crystallographic Data of <b>3aa</b>                                       | S64 |

## General Information

All reactions were performed under Ar atmospheres in oven-dried glassware with magnetic stirring. Unless otherwise stated, all reagents were purchased from commercial suppliers and used without further purification. All solvents were purified and dried according to standard methods prior to use. Organic solutions were concentrated under reduced pressure on a rotary evaporator or an oil pump. Reactions were monitored through thin layer chromatography (TLC) on silica gel-precoated glass plates. Chromatograms were visualized by fluorescence quenching with UV light at 254 nm. Flash column chromatography was performed using Qingdao Haiyang flash silica gel (200–300 mesh).  $^1\text{H}$  and  $^{13}\text{C}$  NMR spectra were recorded in  $\text{CDCl}_3$  using a 400, 600 or 800 MHz NMR instrument (referenced internally to  $\text{Me}_4\text{Si}$ ).  $^1\text{H}$  NMR data are reported as follows: chemical shift, multiplicity (s = singlet; d = doublet; q = quartet; m = multiplet; br = broad), coupling constant (Hz), and integral. Data for  $^{13}\text{C}$  NMR spectra are reported in terms of chemical shift. Melting points were determined by an X-4 digital micro melting point apparatus. Accurate mass measurements were performed using a SCIEX X500r instrument with the ESI-MS technique.

Starting materials and reagents were purchased directly from commercial suppliers and used without further purifications. All solvents used as reaction medium were distilled before the use. The 2-methylenetriethylamine carbonate **1a**<sup>[1]</sup>, *N*-tosyl carbamate **4a**<sup>[2]</sup> and Sulfamate-derived Cyclic Imines **2**<sup>[3]</sup> were synthesized using known literature procedures.

## General Procedure for Preparation of [4+2] Products

Under argon atmosphere, to a mixture of 2-methylenetriethylamine carbonate **1a** or *N*-tosyl carbamate **4a** (0.15 mmol), Sulfamate-derived cyclic imines **2** (0.10 mmol) and catalyst  $\text{Pd}_2(\text{dba})_3 \cdot \text{CHCl}_3$  (2.5 mol%, 0.0025 mmol) / Xantphos (7.5 mol %, 0.0075 mmol)

---

<sup>[1]</sup> R. Shintani, K. Moriya, T. Hayashi, *Chem. Commun.* **2011**, 47, 3057.

<sup>[2]</sup> Allen, B. D. W.; Connolly, M. J.; Harrity, J. P. A. *Chem. Eur. J.* **2016**, 22, 13000.

<sup>[3]</sup> Wang, H.; Jiang, T.; Xu, M.-H. *J. Am. Chem. Soc.* **2013**, 135, 971.

in a Schlenk tube, 1 mL of toluene were added at room temperature. The resulting mixture was stirred until the starting material were completely consumed (monitored by TLC) and then was concentrated to dryness. The residue was purified through flash column chromatography (EtOAc / PE) to afford the corresponding cycloaddition product **3** or **5**.

### Characterization Data of the Products **3**, **5**

#### **3-methylene-3,4-dihydro-2H,11bH-benzo[e][1,3]oxazino[3,2-c][1,2,3]oxathiazine 6,6-dioxide (3aa)**

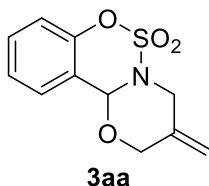

Prepared according to the general procedure as described above in 99% yield. It was purified by flash chromatography (6.7% EtOAc/PE) to afford a white solid. mp = 120-122 °C; <sup>1</sup>H NMR (400 MHz, CDCl<sub>3</sub>) δ 7.51 – 7.17 (m, 3H), 7.01 (dd, *J* = 8.2, 2.2 Hz, 1H), 6.04 (s, 1H), 5.08 (d, *J* = 19.0 Hz, 2H), 4.36 – 4.20 (m, 2H), 3.97 (t, *J* = 2.9 Hz, 2H); <sup>13</sup>C NMR (101 MHz, CDCl<sub>3</sub>) δ 149.8, 134.4, 131.3, 127.9, 126.0, 118.3, 118.2, 114.3, 85.8, 67.8, 49.0; HRMS (ESI) calcd for C<sub>11</sub>H<sub>11</sub>NO<sub>4</sub>S [M+H]<sup>+</sup>:254.0482, found 254.0477.

#### **10-methyl-3-methylene-3,4-dihydro-2H,11bH-benzo[e][1,3]oxazino[3,2-c][1,2,3]oxathiazine 6,6-dioxide (3ab)**

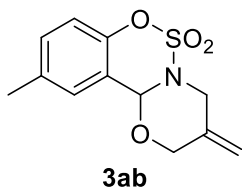

Prepared according to the general procedure as described above in 93% yield. It was purified by flash chromatography (6.7% EtOAc/PE) to afford a white solid. mp = 118-122 °C; <sup>1</sup>H NMR (400 MHz, CDCl<sub>3</sub>) δ 7.27 – 7.07 (m, 2H), 6.90 (d, *J* = 8.4 Hz, 1H), 5.98 (s, 1H), 5.07 (d, *J* = 18.6 Hz, 2H), 4.40 – 4.18 (m, 2H), 3.96 (d, *J* = 1.1 Hz, 2H), 2.29 (s, 3H); <sup>13</sup>C NMR (101 MHz, CDCl<sub>3</sub>) δ 146.6, 134.8, 133.5, 130.8, 126.9, 117.0, 116.9, 113.2, 84.9, 66.9, 48.0, 19.8; HRMS (ESI) calcd for C<sub>12</sub>H<sub>13</sub>NO<sub>4</sub>S [M+H]<sup>+</sup>: 268.0638, found:268.0636.

#### **9-methyl-3-methylene-3,4-dihydro-2H,11bH-benzo[e][1,3]oxazino[3,2-c][1,2,3]oxathiazine 6,6-dioxide (3ac)**

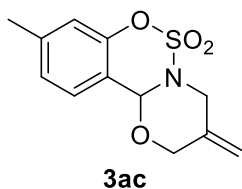

Prepared according to the general procedure as described above in 65% yield. It was purified by flash chromatography (6.7% EtOAc/PE) to afford a white solid. mp = 130-136 °C; <sup>1</sup>H NMR (400 MHz, CDCl<sub>3</sub>) δ 7.28 (d, *J* = 7.7 Hz, 1H), 7.06 – 6.99 (m, 1H), 6.84 – 6.79 (m, 1H), 5.99 (s, 1H), 5.14 – 4.96 (m, 2H), 4.34 – 4.14 (m, 2H), 3.95 (q, *J* = 1.2 Hz, 2H), 2.30 (s, 3H); <sup>13</sup>C NMR (101 MHz, CDCl<sub>3</sub>) δ 149.6, 142.1, 134.6, 127.6, 126.8,

118.4, 115.3, 114.1, 85.8, 67.7, 49.0, 21.2; HRMS (ESI) calcd for C<sub>12</sub>H<sub>13</sub>NO<sub>4</sub>S [M+H]<sup>+</sup>: 268.0638, found: 268.0639.

**8-methyl-3-methylene-3,4-dihydro-2H,11bH-benzo[e][1,3]oxazino[3,2-c][1,2,3]oxathiazine 6,6-dioxide (3ad)**

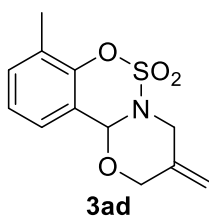

Prepared according to the general procedure as described above in 75% yield. It was purified by flash chromatography (6.7% EtOAc/PE) to afford a white solid. mp = 110-116 °C; <sup>1</sup>H NMR (400 MHz, CDCl<sub>3</sub>) δ 7.24 – 7.06 (m, 3H), 6.00 (s, 1H), 5.07 (d, *J* = 19.4 Hz, 2H), 4.40 – 4.19 (m, 2H), 3.97 (d, *J* = 1.3 Hz, 2H), 2.24 (s, 3H); <sup>13</sup>C NMR (101 MHz, CDCl<sub>3</sub>) δ 148.2, 134.6, 132.6, 127.7, 125.4, 125.3, 118.2, 114.2, 86.1, 68.0, 49.1, 15.5; HRMS (ESI) calcd for C<sub>12</sub>H<sub>13</sub>NO<sub>4</sub>S [M+H]<sup>+</sup>: 268.0638, found: 268.0635.

**10-methoxy-3-methylene-3,4-dihydro-2H,11bH-benzo[e][1,3]oxazino[3,2-c][1,2,3]oxathiazine 6,6-dioxide (3ae)**

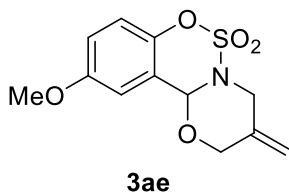

Prepared according to the general procedure as described above in 55% yield. It was purified by flash chromatography (6.7% EtOAc/PE) to afford a transparency liquid; <sup>1</sup>H NMR (400 MHz, CDCl<sub>3</sub>) δ 6.99 – 6.75 (m, 3H), 6.00 (s, 1H), 5.15 – 4.98 (m, 2H), 4.34 – 4.21 (m, 2H), 4.04 – 3.87 (m, 2H), 3.75 (s, 3H); <sup>13</sup>C NMR (101 MHz, CDCl<sub>3</sub>) δ 157.3, 143.5, 134.4, 119.3, 119.0, 117.4, 114.3, 111.6, 85.8, 67.7, 55.9, 49.0; HRMS (ESI) calcd for C<sub>12</sub>H<sub>13</sub>NO<sub>5</sub>S [M+H]<sup>+</sup>: 284.0587, found: 284.0578.

**9-methoxy-3-methylene-3,4-dihydro-2H,11bH-benzo[e][1,3]oxazino[3,2-c][1,2,3]oxathiazine 6,6-dioxide (3af)**

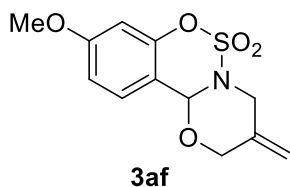

Prepared according to the general procedure as described above in 99% yield. It was purified by flash chromatography (6.7% EtOAc/PE) to afford a white solid. mp = 124-127 °C; <sup>1</sup>H NMR (400 MHz, CDCl<sub>3</sub>) δ 7.29 (dd, *J* = 8.6, 0.8 Hz, 1H), 6.76 (dd, *J* = 8.7, 2.5 Hz, 1H), 6.51 (d, *J* = 2.5 Hz, 1H), 5.97 (s, 1H), 5.19 – 4.98 (m, 2H), 4.35 – 4.16 (m, 2H), 3.95 (d, *J* = 1.2 Hz, 2H), 3.74 (s, 3H); <sup>13</sup>C NMR (101 MHz, CDCl<sub>3</sub>) δ 161.7, 150.6, 134.6, 128.7, 114.2, 112.8, 110.2, 103.0, 85.7, 67.6, 55.7, 49.0; HRMS (ESI) calcd for C<sub>12</sub>H<sub>13</sub>NO<sub>5</sub>S [M+H]<sup>+</sup>: 284.0587, found: 284.0577.

**8-methoxy-3-methylene-3,4-dihydro-2H,11bH-benzo[e][1,3]oxazino[3,2-c][1,2,3]oxathiazine 6,6-dioxide (3ag)**

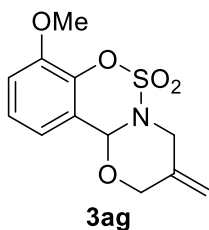

Prepared according to the general procedure as described above in 95% yield. It was purified by flash chromatography (6.7% EtOAc/PE) to afford a white solid. mp = 136-140 °C; <sup>1</sup>H NMR (400 MHz, CDCl<sub>3</sub>) δ 7.15 (t, *J* = 8.0 Hz, 1H), 7.02 – 6.89 (m, 2H), 6.07 (s, 1H), 5.07 (d, *J* = 19.5 Hz, 2H), 4.36 – 4.16 (m, 2H), 4.05 – 3.88 (m, 2H), 3.82 (s, 3H); <sup>13</sup>C NMR (101 MHz, CDCl<sub>3</sub>) δ 148.5, 139.5, 134.5, 125.7, 119.2, 118.6, 114.2, 113.4, 85.8, 67.5, 56.3, 49.0; HRMS (ESI) calcd for C<sub>12</sub>H<sub>13</sub>NO<sub>5</sub>S [M+H]<sup>+</sup>: 284.0587, found: 284.0578.

**10-(tert-butyl)-3-methylene-3,4-dihydro-2H,11bH-benzo[e][1,3]oxazino[3,2-c][1,2,3]oxathiazine 6,6-dioxide (3ah)**

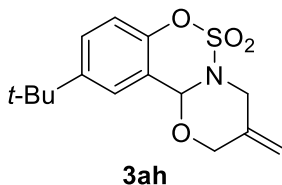

Prepared according to the general procedure as described above in 99% yield. It was purified by flash chromatography (6.7% EtOAc/PE) to afford a white solid. mp = 120-126 °C; <sup>1</sup>H NMR (400 MHz, CDCl<sub>3</sub>) δ 7.30 (ddd, *J* = 31.0, 8.0, 1.8 Hz, 2H), 7.14 (t, *J* = 7.8 Hz, 1H), 5.92 (s, 1H), 5.07 (d, *J* = 20.7 Hz, 2H), 4.41 – 4.26 (m, 2H), 4.17 – 3.91 (m, 2H), 1.34 (s, 9H); <sup>13</sup>C NMR (101 MHz, CDCl<sub>3</sub>) δ 147.7, 138.5, 133.6, 127.7, 125.0, 124.4, 118.5, 113.1, 85.5, 67.9, 48.1, 33.9, 28.9; HRMS (ESI) calcd for C<sub>15</sub>H<sub>19</sub>NO<sub>4</sub>S [M+H]<sup>+</sup>: 310.1108, found: 310.1109.

**9-(tert-butyl)-3-methylene-3,4-dihydro-2H,11bH-benzo[e][1,3]oxazino[3,2-c][1,2,3]oxathiazine 6,6-dioxide (3ai)**

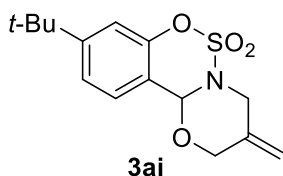

Prepared according to the general procedure as described above in 90% yield. It was purified by flash chromatography (6.7% EtOAc/PE) to afford a white solid. mp = 124-128 °C; <sup>1</sup>H NMR (400 MHz, CDCl<sub>3</sub>) δ 7.35 – 7.22 (m, 2H), 7.00 (d, *J* = 1.8 Hz, 1H), 6.01 (s, 1H), 5.06 (ddd, *J* = 18.7, 1.6, 0.8 Hz, 2H), 4.35 – 4.15 (m, 2H), 3.95 (dd, *J* = 3.0, 1.3 Hz, 2H), 1.24 (s, 9H); <sup>13</sup>C NMR (201 MHz, CDCl<sub>3</sub>) δ 154.8, 148.9, 133.9, 126.7, 122.5, 114.5, 114.4, 113.4, 85.0, 66.9, 48.3, 34.3, 30.3; HRMS (ESI) calcd for C<sub>15</sub>H<sub>19</sub>NO<sub>4</sub>S [M+H]<sup>+</sup>: 310.1108, found: 310.1109.

**9-isopropyl-3-methylene-3,4-dihydro-2H,11bH-benzo[e][1,3]oxazino[3,2-c][1,2,3]oxathiazine 6,6-dioxide (3aj)**

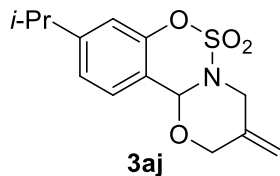

Prepared according to the general procedure as described above in 85% yield. It was purified by flash chromatography (6.7% EtOAc/PE) to afford a white solid. mp = 112-118 °C; <sup>1</sup>H NMR (400 MHz, CDCl<sub>3</sub>) δ 7.36 – 7.29 (m, 1H), 7.12 – 6.98 (m, 1H), 6.85 (d, *J* = 1.7 Hz, 1H), 6.00 (s, 1H), 5.06 (d, *J* = 18.7 Hz, 2H), 4.37 – 4.16 (m, 2H), 3.95 (q, *J* = 1.3 Hz, 2H), 2.85 (p, *J* = 6.9 Hz, 1H), 1.17 (d, *J* = 7.0 Hz, 6H); <sup>13</sup>C NMR (101 MHz, CDCl<sub>3</sub>) δ 153.07, 149.76, 134.61, 127.70, 124.35, 115.94, 115.56, 114.11, 85.81, 67.63, 49.01, 33.92, 23.63; HRMS (ESI) calcd for C<sub>14</sub>H<sub>17</sub>NO<sub>4</sub>S [M+H]<sup>+</sup>: 296.0951, found: 296.0952.

**10-fluoro-3-methylene-3,4-dihydro-2H,11bH-benzo[e][1,3]oxazino[3,2-c][1,2,3]oxathiazine 6,6-dioxide (3ak)**

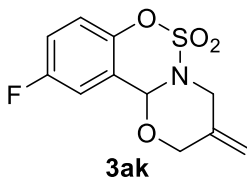

Prepared according to the general procedure as described above in 50% yield. It was purified by flash chromatography (6.7% EtOAc/PE) to afford a white solid. mp = 132-136 °C; <sup>1</sup>H NMR (400 MHz, CDCl<sub>3</sub>) δ 7.17 – 6.96 (m, 3H), 6.01 (s, 1H), 5.16 – 5.05 (m, 2H), 4.26 (s, 2H), 4.10 – 3.77 (m, 2H); <sup>13</sup>C NMR (201 MHz, CDCl<sub>3</sub>) δ 159.3 (d, *J* = 246.7 Hz), 145.2, 133.5, 119.5, 119.4, 117.9 (d, *J* = 23.8 Hz), 114.1, 113.9 (d, *J* = 25.2 Hz), 84.8, 67.2, 48.4; <sup>19</sup>F NMR (377 MHz, CDCl<sub>3</sub>) δ -114.94. HRMS (ESI) calcd for C<sub>11</sub>H<sub>10</sub>FNO<sub>4</sub>S [M+H]<sup>+</sup>: 272.0387, found: 272.0391.

**9-fluoro-3-methylene-3,4-dihydro-2H,11bH-benzo[e][1,3]oxazino[3,2-c][1,2,3]oxathiazine 6,6-dioxide (3al)**

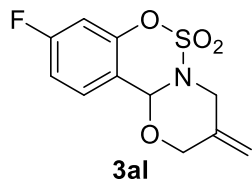

Prepared according to the general procedure as described above in 99% yield. It was purified by flash chromatography (6.7% EtOAc/PE) to afford a white solid. mp = 122-126 °C; <sup>1</sup>H NMR (400 MHz, CDCl<sub>3</sub>) δ 7.41 (ddd, *J* = 8.7, 6.0, 0.8 Hz, 1H), 7.03 – 6.68 (m, 2H), 6.01 (t, *J* = 1.1 Hz, 1H), 5.08 (d, *J* = 18.9 Hz, 2H), 4.25 (s, 2H), 4.06 – 3.87 (m, 2H); <sup>13</sup>C NMR (101 MHz, CDCl<sub>3</sub>) δ 162.5 (d, *J* = 252.0 Hz), 149.5 (d, *J* = 12.2 Hz), 133.1, 128.4 (d, *J* = 9.7 Hz), 113.5, 112.5 (d, *J* = 21.8 Hz), 105.1 (d, *J* = 25.9 Hz), 84.4, 66.5, 47.9; <sup>19</sup>F NMR (377 MHz, CDCl<sub>3</sub>) δ -107.35. HRMS (ESI) calcd for C<sub>11</sub>H<sub>10</sub>FNO<sub>4</sub>S [M+H]<sup>+</sup>: 272.0387, found: 272.0364.

**8-fluoro-3-methylene-3,4-dihydro-2H,11bH-benzo[e][1,3]oxazino[3,2-c][1,2,3]oxathiazine 6,6-dioxide (3am)**

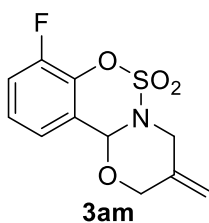

Prepared according to the general procedure as described above in 99% yield. It was purified by flash chromatography (6.7% EtOAc/PE) to afford a white solid. mp = 126-130 °C;  $^1\text{H}$  NMR (400 MHz,  $\text{CDCl}_3$ )  $\delta$  7.21 – 7.12 (m, 3H), 6.12 (s, 1H), 5.09 (d,  $J = 20.6$  Hz, 2H), 4.24 (d,  $J = 0.9$  Hz, 2H), 4.05 – 3.87 (m, 2H);  $^{13}\text{C}$  NMR (101 MHz,  $\text{CDCl}_3$ )  $\delta$  149.6 (d,  $J = 252.7$  Hz), 132.9, 124.7 (d,  $J = 7.0$  Hz), 121.6 (d,  $J = 4.0$  Hz), 119.3, 117.0 (d,  $J = 17.5$  Hz), 113.6, 84.4 (d,  $J = 2.5$  Hz), 66.2, 47.9;  $^{19}\text{F}$  NMR (377 MHz,  $\text{CDCl}_3$ )  $\delta$  -131.74. HRMS (ESI) calcd for  $\text{C}_{11}\text{H}_{10}\text{FNO}_4\text{S}$   $[\text{M}+\text{H}]^+$ : 272.0387, found: 272.0383.

**10-chloro-3-methylene-3,4-dihydro-2H,11bH-benzo[e][1,3]oxazino[3,2-c][1,2,3]oxathiazine 6,6-dioxide (3an)**

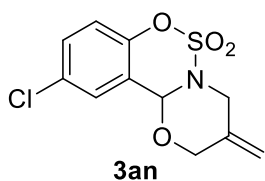

Prepared according to the general procedure as described above in 99% yield. It was purified by flash chromatography (6.7% EtOAc/PE) to afford a white solid. mp = 118-122 °C;  $^1\text{H}$  NMR (400 MHz,  $\text{CDCl}_3$ )  $\delta$  7.48 – 7.27 (m, 2H), 7.05 – 6.89 (m, 1H), 6.01 (s, 1H), 5.09 (d,  $J = 17.2$  Hz, 2H), 4.26 (s, 2H), 4.09 – 3.83 (m, 2H);  $^{13}\text{C}$  NMR (101 MHz,  $\text{CDCl}_3$ )  $\delta$  148.3, 134.0, 131.4, 129.0, 127.8, 119.9, 119.8, 114.7, 85.2, 67.7, 49.0; HRMS (ESI) calcd for  $\text{C}_{11}\text{H}_{10}\text{ClNO}_4\text{S}$   $[\text{M}+\text{H}]^+$ : 288.0092, found: 288.0091.

**9-chloro-3-methylene-3,4-dihydro-2H,11bH-benzo[e][1,3]oxazino[3,2-c][1,2,3]oxathiazine 6,6-dioxide (3ao)**

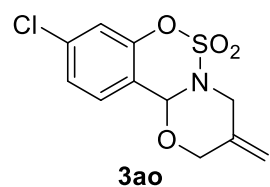

Prepared according to the general procedure as described above in 99% yield. It was purified by flash chromatography (6.7% EtOAc/PE) to afford a white solid. mp = 116-120 °C;  $^1\text{H}$  NMR (400 MHz,  $\text{CDCl}_3$ )  $\delta$  7.46 – 6.99 (m, 3H), 6.01 (d,  $J = 0.8$  Hz, 1H), 5.08 (dt,  $J = 18.9, 1.2$  Hz, 2H), 4.24 (t,  $J = 0.9$  Hz, 2H), 4.05 – 3.85 (m, 2H);  $^{13}\text{C}$  NMR (101 MHz,  $\text{CDCl}_3$ )  $\delta$  149.0, 135.6, 133.0, 127.9, 125.3, 117.6, 115.9, 113.6, 84.3, 66.5, 47.9; HRMS (ESI) calcd for  $\text{C}_{11}\text{H}_{10}\text{ClNO}_4\text{S}$   $[\text{M}+\text{H}]^+$ : 288.0092, found: 288.0082.

**8-chloro-3-methylene-3,4-dihydro-2H,11bH-benzo[e][1,3]oxazino[3,2-c][1,2,3]oxathiazine 6,6-dioxide (3ap)**

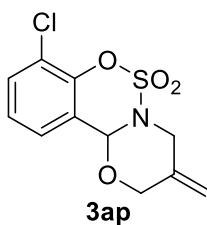

Prepared according to the general procedure as described above in 51% yield. It was purified by flash chromatography (6.7% EtOAc/PE) to afford a white solid. mp = 1186-120 °C; <sup>1</sup>H NMR (400 MHz, CDCl<sub>3</sub>) δ 7.39 – 7.20 (m, 2H), 7.04 (d, *J* = 2.0 Hz, 1H), 6.01 (s, 1H), 5.09 (d, *J* = 19.4 Hz, 2H), 4.24 (s, 2H), 4.01 – 3.87 (m, 2H); <sup>13</sup>C NMR (101 MHz, CDCl<sub>3</sub>) δ 150.1, 136.7, 134.1, 128.9, 126.3, 118.7, 116.9, 114.6, 85.4, 67.6, 49.0; HRMS (ESI) calcd for C<sub>11</sub>H<sub>10</sub>ClNO<sub>4</sub>S [M+H]<sup>+</sup>: 288.0092, found: 288.0085.

**10-bromo-3-methylene-3,4-dihydro-2H,11bH-benzo[e][1,3]oxazino[3,2-c][1,2,3]oxathiazine 6,6-dioxide (3aq)**

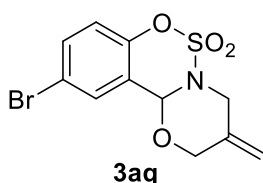

Prepared according to the general procedure as described above in 90% yield. It was purified by flash chromatography (6.7% EtOAc/PE) to afford a white solid. mp = 126-128 °C; <sup>1</sup>H NMR (400 MHz, CDCl<sub>3</sub>) δ 7.71 – 7.28 (m, 3H), 7.07 – 6.83 (m, 1H), 6.01 (s, 1H), 5.17 – 4.97 (m, 2H), 4.26 (s, 2H), 4.01 – 3.82 (m, 2H); <sup>13</sup>C NMR (101 MHz, CDCl<sub>3</sub>) δ 147.8, 142.3, 133.2, 132.9, 129.6, 129.4, 127.9, 127.3, 124.3, 119.2, 119.0, 117.6, 113.6, 84.0, 66.6, 47.9; HRMS (ESI) calcd for C<sub>11</sub>H<sub>10</sub>BrNO<sub>4</sub>S [M+H]<sup>+</sup>: 331.9587, found: 331.9571.

**9-bromo-3-methylene-3,4-dihydro-2H,11bH-benzo[e][1,3]oxazino[3,2-c][1,2,3]oxathiazine 6,6-dioxide (3ar)**

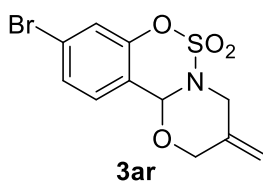

Prepared according to the general procedure as described above in 80% yield. It was purified by flash chromatography (6.7% EtOAc/PE) to afford a white solid. mp = 118-124 °C; <sup>1</sup>H NMR (400 MHz, CDCl<sub>3</sub>) δ 7.39 – 7.18 (m, 3H), 5.99 (s, 1H), 5.08 (d, *J* = 19.2 Hz, 2H), 4.24 (s, 2H), 4.04 – 3.85 (m, 2H); <sup>13</sup>C NMR (101 MHz, CDCl<sub>3</sub>) δ 150.1, 134.0, 129.2, 129.1, 124.3, 121.5, 117.4, 114.6, 85.4, 67.5, 49.0; HRMS (ESI) calcd for C<sub>11</sub>H<sub>10</sub>BrNO<sub>4</sub>S [M+H]<sup>+</sup>: 331.9587, found: 331.9575.



**8-bromo-3-methylene-3,4-dihydro-2H,11bH-benzo[e][1,3]oxazino[3,2-c][1,2,3]oxathiazine 6,6-dioxide (3as)**

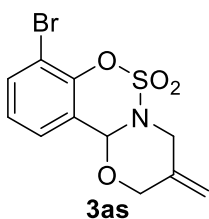

Prepared according to the general procedure as described above in 50% yield. It was purified by flash chromatography (6.7% EtOAc/PE) to afford a white solid. mp = 130-134 °C;  $^1\text{H}$  NMR (800 MHz,  $\text{CDCl}_3$ )  $\delta$  7.71 – 7.10 (m, 4H), 6.15 (s, 1H), 5.16 (d,  $J = 41.5$  Hz, 2H), 4.31 (s, 2H), 4.03 (dd,  $J = 78.7, 13.3$  Hz, 2H);  $^{13}\text{C}$  NMR (201 MHz,  $\text{CDCl}_3$ )  $\delta$  145.5, 133.7, 132.7, 125.6, 125.1, 118.8, 113.3, 110.7, 84.2, 66.1, 47.7; HRMS (ESI) calcd for  $\text{C}_{11}\text{H}_{10}\text{BrNO}_4\text{S}$   $[\text{M}+\text{H}]^+$ : 331.9587, found: 331.9574.

**3-methylene-3,4-dihydro-2H,13cH-naphtho[1,2-e][1,3]oxazino[3,2-c][1,2,3]oxathiazine 6,6-dioxide (3at)**

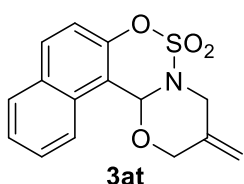

Prepared according to the general procedure as described above in 83% yield. It was purified by flash chromatography (6.7% EtOAc/PE) to afford a white solid. mp = 210-216 °C;  $^1\text{H}$  NMR (800 MHz,  $\text{CDCl}_3$ )  $\delta$  8.02 – 7.81 (m, 3H), 7.58 (dddd,  $J = 69.9, 8.1, 6.8, 1.2$  Hz, 2H), 7.18 (d,  $J = 9.0$  Hz, 1H), 6.37 (s, 1H), 5.20 (d,  $J = 48.1$  Hz, 2H), 4.74 – 4.52 (m, 3H), 4.18 (d,  $J = 15.1$  Hz, 1H);  $^{13}\text{C}$  NMR (101 MHz,  $\text{CDCl}_3$ )  $\delta$  147.9, 134.9, 132.6, 131.2, 130.6, 128.7, 128.0, 126.0, 123.7, 117.5, 114.2, 112.4, 86.5, 70.9, 49.8; HRMS (ESI) calcd for  $\text{C}_{15}\text{H}_{13}\text{NO}_4\text{S}$   $[\text{M}+\text{H}]^+$ : 304.0638, found: 304.0634.

**3-methylene-1-tosyl-1,3,4,11b-tetrahydro-2H-benzo[e]pyrimido[1,2-c][1,2,3]oxathiazine 6,6-dioxide (5aa)**

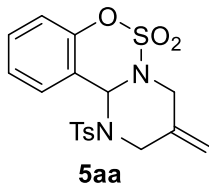

Prepared according to the general procedure as described above in 96% yield. It was purified by flash chromatography (6.7% EtOAc/PE) to afford a white solid. mp = 168-174 °C;  $^1\text{H}$  NMR (400 MHz,  $\text{CDCl}_3$ )  $\delta$  7.77 – 7.24 (m, 7H), 7.08 – 6.88 (m, 2H), 4.73 (d,  $J = 10.9$  Hz, 2H), 4.27 (d,  $J = 15.9$  Hz, 1H), 3.70 – 3.52 (m, 2H), 3.28 (d,  $J = 12.6$  Hz, 1H), 2.37 (s, 3H);  $^{13}\text{C}$  NMR (101 MHz,  $\text{CDCl}_3$ )  $\delta$  150.4, 144.5, 135.8, 131.5, 131.3, 129.7, 128.1, 127.6, 126.4, 118.3, 115.6, 115.6, 69.6, 48.7, 45.3, 21.6; HRMS (ESI) calcd for  $\text{C}_{18}\text{H}_{18}\text{N}_2\text{O}_5\text{S}_2$   $[\text{M}+\text{H}]^+$ : 407.0730, found: 407.0730

**10-methyl-3-methylene-1-tosyl-1,3,4,11b-tetrahydro-2H-benzo[e]pyrimido[1,2-c][1,2,3]oxathiazine 6,6-dioxide (5ab)**

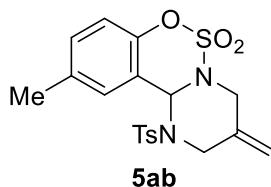

Prepared according to the general procedure as described above in 78% yield. It was purified by flash chromatography (6.7% EtOAc/PE) to afford a white solid. mp = 220-226 °C; <sup>1</sup>H NMR (800 MHz, CDCl<sub>3</sub>) δ 7.78 (dd, *J* = 8.3, 1.6 Hz, 2H), 7.41 – 7.20 (m, 4H), 6.95 (d, *J* = 7.8 Hz, 2H), 4.86 – 4.74 (m, 2H), 4.35 (d, *J* = 16.0 Hz, 1H), 3.72 – 3.66 (m, 2H), 3.34 (d, *J* = 12.7 Hz, 1H), 2.44 (s, 3H), 2.38 (s, 3H); <sup>13</sup>C NMR (201 MHz, CDCl<sub>3</sub>) δ 148.3, 144.5, 136.5, 135.9, 132.0, 131.4, 129.7, 128.1, 127.5, 118.0, 115.4, 115.1, 69.6, 48.7, 45.3, 21.6, 20.8; HRMS (ESI) calcd for C<sub>19</sub>H<sub>20</sub>N<sub>2</sub>O<sub>5</sub>S<sub>2</sub> [M+H]<sup>+</sup>: 421.0886, found: 421.0885.

**9-methyl-3-methylene-1-tosyl-1,3,4,11b-tetrahydro-2H-benzo[e]pyrimido[1,2-c][1,2,3]oxathiazine 6,6-dioxide (5ac)**

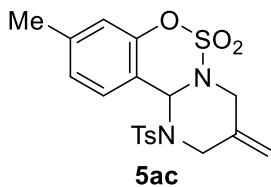

Prepared according to the general procedure as described above in 53% yield. It was purified by flash chromatography (6.7% EtOAc/PE) to afford a white solid. mp = 170-176 °C; <sup>1</sup>H NMR (800 MHz, CDCl<sub>3</sub>) δ 7.80 – 7.76 (m, 2H), 7.47 (dd, *J* = 7.9, 1.1 Hz, 1H), 7.31 (d, *J* = 8.1 Hz, 2H), 7.13 (dd, *J* = 8.0, 1.7 Hz, 1H), 6.97 – 6.80 (m, 2H), 4.79 (dt, *J* = 22.4, 1.6 Hz, 2H), 4.33 (d, *J* = 16.0 Hz, 1H), 3.67 (ddd, *J* = 17.7, 14.4, 1.5 Hz, 2H), 3.35 (dd, *J* = 12.7, 1.8 Hz, 1H), 2.44 (s, 3H), 2.38 (s, 3H); <sup>13</sup>C NMR (201 MHz, CDCl<sub>3</sub>) δ 150.2, 144.5, 142.3, 135.9, 131.5, 129.7, 128.1, 127.3, 127.3, 118.5, 115.4, 112.4, 69.5, 48.6, 45.2, 21.6, 21.1; HRMS (ESI) calcd for C<sub>19</sub>H<sub>20</sub>N<sub>2</sub>O<sub>5</sub>S<sub>2</sub> [M+H]<sup>+</sup>: 421.0886, found: 421.0884.

**8-methyl-3-methylene-1-tosyl-1,3,4,11b-tetrahydro-2H-benzo[e]pyrimido[1,2-c][1,2,3]oxathiazine 6,6-dioxide (5ad)**

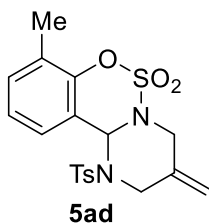

Prepared according to the general procedure as described above in 90% yield. It was purified by flash chromatography (6.7% EtOAc/PE) to afford a white solid. mp = 180-186 °C; <sup>1</sup>H NMR (800 MHz, CDCl<sub>3</sub>) δ 7.73 – 7.70 (m, 2H), 7.38 (d, *J* = 7.7 Hz, 1H), 7.26 – 7.11 (m, 4H), 6.91 (s, 1H), 4.72 (dt, *J* = 23.3, 1.6 Hz, 2H), 4.26 (d, *J* = 16.0 Hz, 1H), 3.65 – 3.57 (m, 2H), 3.28 (dd, *J* = 12.8, 1.9 Hz, 1H), 2.37 (s, 3H), 2.22 (s, 3H); <sup>13</sup>C NMR (201 MHz, CDCl<sub>3</sub>) δ 147.8, 143.4, 134.9, 131.9, 130.4, 128.6, 127.1, 126.7, 124.6, 124.0, 114.3, 114.2, 68.6, 47.7, 44.2, 20.6, 14.5; HRMS (ESI) calcd for C<sub>19</sub>H<sub>20</sub>N<sub>2</sub>O<sub>5</sub>S<sub>2</sub> [M+H]<sup>+</sup>: 421.0886, found: 421.0884.

**10-methoxy-3-methylene-1-tosyl-1,3,4,11b-tetrahydro-2H-benzo[e]pyrimido[1,2-c][1,2,3]oxathiazine 6,6-dioxide (5ae)**

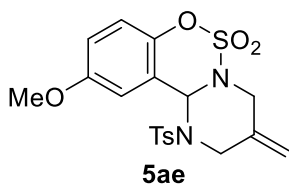

Prepared according to the general procedure as described above in 83% yield. It was purified by flash chromatography (6.7% EtOAc/PE) to afford a white solid. mp = 210-216 °C; <sup>1</sup>H NMR (800 MHz, CDCl<sub>3</sub>) δ 7.71 (d, *J* = 8.1 Hz, 2H), 7.24 (d, *J* = 8.1 Hz, 2H), 7.05 – 6.74 (m, 4H), 4.74 (d, *J* = 28.3 Hz, 2H), 4.28 (d, *J* = 16.0 Hz, 1H), 3.76 (d, *J* = 0.9 Hz, 3H), 3.61 (d, *J* = 13.9 Hz, 2H), 3.27 (d, *J* = 12.7 Hz, 1H), 2.37 (s, 3H); <sup>13</sup>C NMR (201 MHz, CDCl<sub>3</sub>) δ 156.7, 143.5, 142.9, 134.8, 130.3, 128.6, 127.1, 118.3, 116.3, 115.4, 114.5, 110.3, 68.6, 54.9, 47.7, 44.3, 20.6; HRMS (ESI) calcd for C<sub>19</sub>H<sub>20</sub>N<sub>2</sub>O<sub>6</sub>S<sub>2</sub> [M+H]<sup>+</sup>: 437.0835, found: 437.0833.

**9-methoxy-3-methylene-1-tosyl-1,3,4,11b-tetrahydro-2H-benzo[e]pyrimido[1,2-c][1,2,3]oxathiazine 6,6-dioxide (5af)**

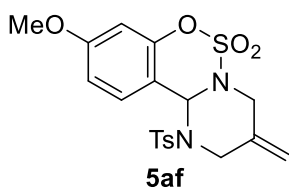

Prepared according to the general procedure as described above in 99% yield. It was purified by flash chromatography (6.7% EtOAc/PE) to afford a white solid. mp = 168-176 °C; <sup>1</sup>H NMR (800 MHz, CDCl<sub>3</sub>) δ 7.74 – 7.69 (m, 2H), 7.46 – 7.21 (m, 3H), 6.90 – 6.75 (m, 2H), 6.51 (d, *J* = 2.5 Hz, 1H), 4.80 – 4.63 (m, 2H), 4.25 (d, *J* = 15.9 Hz, 1H), 3.74 (s, 3H), 3.59 (t, *J* = 14.4 Hz, 2H), 3.39 – 3.26 (m, 1H), 2.37 (s, 3H); <sup>13</sup>C NMR (201 MHz, CDCl<sub>3</sub>) δ 160.8, 150.1, 143.4, 134.9, 130.4, 128.6, 127.3, 127.0, 114.4, 111.8, 106.0, 102.3, 68.3, 54.7, 47.6, 44.1, 20.6; HRMS (ESI) calcd for C<sub>19</sub>H<sub>20</sub>N<sub>2</sub>O<sub>6</sub>S<sub>2</sub> [M+H]<sup>+</sup>: 437.0835, found: 437.0831.

**8-methoxy-3-methylene-1-tosyl-1,3,4,11b-tetrahydro-2H-benzo[e]pyrimido[1,2-c][1,2,3]oxathiazine 6,6-dioxide (5ag)**

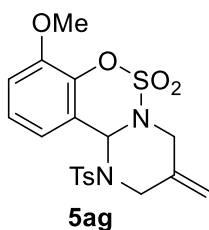

Prepared according to the general procedure as described above in 98% yield. It was purified by flash chromatography (6.7% EtOAc/PE) to afford a white solid. mp = 190-194 °C; <sup>1</sup>H NMR (400 MHz, CDCl<sub>3</sub>) δ 7.79 – 7.62 (m, 2H), 7.27 – 6.87 (m, 6H), 4.73 (dt, *J* = 10.9, 1.6 Hz, 2H), 4.26 (d, *J* = 15.9 Hz, 1H), 3.82 (s, 3H), 3.76 – 3.44 (m, 2H), 3.31 (dd, *J* = 12.6, 1.8 Hz, 1H), 2.37 (s, 3H); <sup>13</sup>C NMR (201 MHz, CDCl<sub>3</sub>) δ 148.4, 144.5, 139.9, 135.9, 131.4, 129.7, 128.1, 125.9, 118.2, 116.5, 115.5, 113.7, 69.7, 56.3, 48.7, 45.3, 21.6; HRMS (ESI) calcd for C<sub>19</sub>H<sub>20</sub>N<sub>2</sub>O<sub>6</sub>S<sub>2</sub> [M+H]<sup>+</sup>: 437.0835, found: 437.0826.

**9-(tert-butyl)-3-methylene-1-tosyl-1,3,4,11b-tetrahydro-2H-benzo[e]pyrimido[1,2-c][1,2,3]oxathiazine 6,6-dioxide (5ai)**

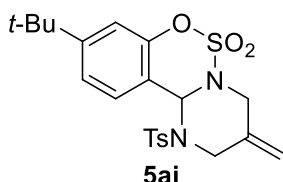

Prepared according to the general procedure as described above in 98% yield. It was purified by flash chromatography (6.7% EtOAc/PE) to afford a white solid. mp = 212-218 °C; <sup>1</sup>H NMR (800 MHz, CDCl<sub>3</sub>) δ 7.80 – 7.77 (m, 2H), 7.51 (dd, *J* = 8.2, 1.1 Hz, 1H), 7.38 – 7.23 (m, 3H), 7.10 – 6.88 (m, 2H), 4.79 (dt, *J* = 25.2, 1.6 Hz, 2H), 4.34 (d, *J* = 15.9 Hz, 1H), 3.76 – 3.63 (m, 2H), 3.37 (dd, *J* = 12.6, 2.0 Hz, 1H), 2.44 (s, 3H), 1.32 (s, 9H); <sup>13</sup>C NMR (201 MHz, CDCl<sub>3</sub>) δ 155.8, 150.2, 144.4, 136.0, 131.5, 129.7, 129.6, 128.1, 127.1, 123.6, 115.4, 115.2, 112.4, 69.5, 48.7, 45.2, 35.0, 31.0, 21.6; HRMS (ESI) calcd for C<sub>22</sub>H<sub>26</sub>N<sub>2</sub>O<sub>5</sub>S<sub>2</sub> [M+H]<sup>+</sup>: 463.1355, found: 463.1356.

**9-isopropyl-3-methylene-1-tosyl-1,3,4,11b-tetrahydro-2H-benzo[e]pyrimido[1,2-c][1,2,3]oxathiazine 6,6-dioxide (5aj)**

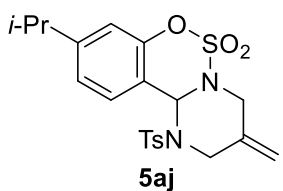

Prepared according to the general procedure as described above in 80% yield. It was purified by flash chromatography (6.7% EtOAc/PE) to afford a transparency liquid; <sup>1</sup>H NMR (400 MHz, CDCl<sub>3</sub>) δ 7.71 (d, *J* = 8.2 Hz, 2H), 7.46 – 7.40 (m, 1H), 7.23 (d, *J* = 8.0 Hz, 2H), 7.11 (dd, *J* = 8.1, 1.7 Hz, 1H), 6.90 – 6.82 (m, 2H), 4.72 (d, *J* = 12.4 Hz, 2H), 4.26 (d, *J* = 15.9 Hz, 1H), 3.61 (dd, *J* = 14.3, 8.1 Hz, 2H), 3.29 (d, *J* = 12.6 Hz, 1H), 2.86 (p, *J* = 6.9 Hz, 1H), 2.37 (s, 3H), 1.18 (dd, *J* = 6.9, 1.2 Hz, 6H); <sup>13</sup>C NMR (101 MHz, CDCl<sub>3</sub>) δ 152.3, 149.3, 143.4, 134.9, 130.5, 128.6, 127.1, 126.3, 123.7, 115.0, 114.3, 111.6, 68.5, 47.6, 44.2, 32.8, 22.6, 22.5, 20.6; HRMS (ESI) calcd for C<sub>21</sub>H<sub>24</sub>N<sub>2</sub>O<sub>5</sub>S<sub>2</sub> [M+H]<sup>+</sup>: 449.1199, found: 449.1196.

**10-fluoro-3-methylene-1-tosyl-1,3,4,11b-tetrahydro-2H-benzo[e]pyrimido[1,2-c][1,2,3]oxathiazine 6,6-dioxide (5ak)**

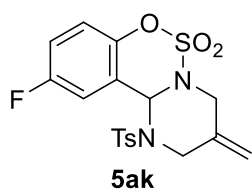

Prepared according to the general procedure as described above in 73% yield. It was purified by flash chromatography (6.7% EtOAc/PE) to afford a white solid. mp = 198-212 °C; <sup>1</sup>H NMR (400 MHz, CDCl<sub>3</sub>) δ 7.74 – 7.67 (m, 2H), 7.31 – 7.22 (m, 3H), 7.12 – 6.81 (m, 3H), 4.76 (dt, *J* = 12.5, 1.5 Hz, 2H), 4.29 (d, *J* = 16.0 Hz, 1H), 3.70 – 3.52 (m, 2H), 3.26 (dd, *J* = 13.0, 1.9 Hz, 1H), 2.38 (s, 3H); <sup>13</sup>C NMR (101 MHz, CDCl<sub>3</sub>) δ 159.1 (d, *J* = 247.6 Hz), 145.1 (d, *J* = 2.8 Hz), 143.7, 134.6, 130.0, 128.7, 127.0, 119.0 (d, *J* = 8.1 Hz), 117.6, 117.4, 116.6 (d, *J* = 6.9 Hz), 114.8, 113.1 (d, *J* = 25.5 Hz), 68.3, 68.3, 47.7, 44.3, 20.6; <sup>19</sup>F NMR (377 MHz, CDCl<sub>3</sub>) δ -113.97; HRMS (ESI) calcd for C<sub>18</sub>H<sub>17</sub>FN<sub>2</sub>O<sub>5</sub>S<sub>2</sub> [M+H]<sup>+</sup>: 425.0635, found: 425.0631.

**9-fluoro-3-methylene-1-tosyl-1,3,4,11b-tetrahydro-2H-benzo[e]pyrimido[1,2-c][1,2,3]oxathiazine 6,6-dioxide (5al)**

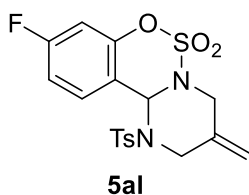

Prepared according to the general procedure as described above in 92% yield. It was purified by flash chromatography (6.7% EtOAc/PE) to afford a white solid. mp = 250-256 °C; <sup>1</sup>H NMR (400 MHz, CDCl<sub>3</sub>) δ 7.81 – 7.40 (m, 3H), 7.24 (d, *J* = 8.1 Hz, 2H), 7.08 – 6.61 (m, 3H), 4.75 (dt, *J* = 10.2, 1.5 Hz, 2H), 4.27 (d, *J* = 15.9 Hz, 1H), 3.69 – 3.49 (m, 2H), 3.28 (dd, *J* = 12.6, 1.7 Hz, 1H), 2.37 (s, 3H); <sup>13</sup>C NMR (101 MHz, CDCl<sub>3</sub>) δ 163.7 (d, *J* = 252.3 Hz), 151.0 (d, *J* = 12.1 Hz), 144.7, 135.7, 131.1, 129.7, 129.2, 129.1, 128.1, 115.8, 113.8 (d, *J* = 21.7 Hz), 111.5 (d, *J* = 3.6 Hz), 106.2 (d, *J* = 26.3 Hz), 69.2, 48.6, 45.2, 21.6; <sup>19</sup>F NMR (377 MHz, CDCl<sub>3</sub>) δ -107.27; HRMS (ESI) calcd for C<sub>18</sub>H<sub>17</sub>FN<sub>2</sub>O<sub>5</sub>S<sub>2</sub> [M+H]<sup>+</sup>: 425.0635, found: 425.0605.

**8-fluoro-3-methylene-1-tosyl-1,3,4,11b-tetrahydro-2H-benzo[e]pyrimido[1,2-c][1,2,3]oxathiazine 6,6-dioxide (5am)**

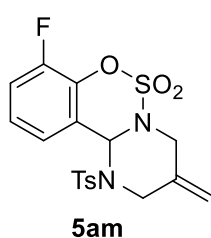

Prepared according to the general procedure as described above in 99% yield. It was purified by flash chromatography (6.7% EtOAc/PE) to afford a white solid. mp = 158-162 °C; <sup>1</sup>H NMR (800 MHz, CDCl<sub>3</sub>) δ 7.78 (dd, *J* = 8.3, 1.7 Hz, 2H), 7.47 – 7.20 (m, 5H), 7.01 (s, 1H), 4.88 – 4.77 (m, 2H), 4.36 (d, *J* = 16.0 Hz, 1H), 3.73 (d, *J* = 12.8 Hz, 1H), 3.65 (d, *J* = 16.0 Hz, 1H), 3.40 (d, *J* = 12.8 Hz, 1H), 2.45 (s, 3H); <sup>13</sup>C NMR (201 MHz, CDCl<sub>3</sub>) δ 150.7 (d, *J* = 252.7 Hz), 144.7, 138.8 (d, *J* = 13.5 Hz), 135.7, 131.0, 129.8, 128.1, 125.9 (d, *J* = 7.0 Hz), 122.3 (d, *J* = 3.6 Hz), 118.3 (d, *J* = 17.8 Hz), 118.0, 115.9, 69.6, 69.6, 48.8, 45.3, 21.6; <sup>19</sup>F NMR (377 MHz, CDCl<sub>3</sub>) δ -131.51; HRMS (ESI) calcd for C<sub>18</sub>H<sub>17</sub>FN<sub>2</sub>O<sub>5</sub>S<sub>2</sub> [M+H]<sup>+</sup>: 425.0635, found: 425.0636.

**10-chloro-3-methylene-1-tosyl-1,3,4,11b-tetrahydro-2H-benzo[e]pyrimido[1,2-c][1,2,3]oxathiazine 6,6-dioxide (5an)**

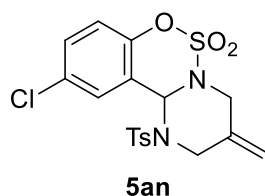

Prepared according to the general procedure as described above in 50% yield. It was purified by flash chromatography (6.7% EtOAc/PE) to afford a white solid. mp = 250-252 °C; <sup>1</sup>H NMR (800 MHz, CDCl<sub>3</sub>) δ 7.86 – 7.21 (m, 6H), 7.10 – 6.87 (m, 2H), 4.83 (dt, *J* = 29.1, 1.6 Hz, 2H), 4.37 (d, *J* = 16.0 Hz, 1H), 3.72 – 3.55 (m, 2H), 3.33 (dd, *J* = 13.0, 2.0 Hz, 1H), 2.45 (s, 3H); <sup>13</sup>C NMR (201 MHz, CDCl<sub>3</sub>) δ 148.8, 144.7, 135.6, 131.9, 131.6, 130.9, 129.8, 128.1, 127.3, 119.8, 117.5, 115.9, 69.3, 48.7, 45.4, 21.6; HRMS (ESI) calcd for C<sub>18</sub>H<sub>17</sub>ClN<sub>2</sub>O<sub>5</sub>S<sub>2</sub> [M+H]<sup>+</sup>: 441.0340, found: 441.0339.

**9-chloro-3-methylene-1-tosyl-1,3,4,11b-tetrahydro-2H-benzo[e]pyrimido[1,2-c][1,2,3]oxathiazine 6,6-dioxide (5ao)**

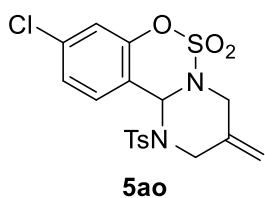

Prepared according to the general procedure as described above in 99% yield. It was purified by flash chromatography (6.7% EtOAc/PE) to afford a white solid. mp = 140-148 °C; <sup>1</sup>H NMR (800 MHz, CDCl<sub>3</sub>) δ 7.86 – 7.53 (m, 3H), 7.37 – 7.24 (m, 3H), 7.17 – 6.85 (m, 2H), 4.82 (dt, *J* = 19.9, 1.6 Hz, 2H), 4.34 (d, *J* = 16.0 Hz, 1H), 3.77 – 3.54 (m, 2H), 3.36 – 3.33 (m, 1H), 2.45 (s, 3H); <sup>13</sup>C NMR (201 MHz, CDCl<sub>3</sub>) δ 150.6, 144.7, 136.9, 135.7, 131.0, 129.8, 128.7, 128.1, 126.7, 118.6, 115.9, 114.3, 69.3, 48.7, 45.2, 21.6; HRMS (ESI) calcd for C<sub>18</sub>H<sub>17</sub>ClN<sub>2</sub>O<sub>5</sub>S<sub>2</sub> [M+H]<sup>+</sup>: 441.0340, found: 441.0350.

**8-chloro-3-methylene-1-tosyl-1,3,4,11b-tetrahydro-2H-benzo[e]pyrimido[1,2-c][1,2,3]oxathiazine 6,6-dioxide (5ap)**

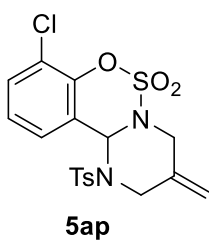

Prepared according to the general procedure as described above in 74% yield. It was purified by flash chromatography (6.7% EtOAc/PE) to afford a white solid. mp = 186-192 °C; <sup>1</sup>H NMR (800 MHz, CDCl<sub>3</sub>) δ 7.96 – 6.88 (m, 8H), 4.95 – 4.75 (m, 2H), 4.35 (d, *J* = 16.0 Hz, 1H), 3.72 (d, *J* = 12.8 Hz, 1H), 3.63 (d, *J* = 16.0 Hz, 1H), 3.37 (d, *J* = 12.8 Hz, 1H), 2.45 (s, 3H); <sup>13</sup>C NMR (201 MHz, CDCl<sub>3</sub>) δ 146.3, 144.7, 135.7, 132.2, 130.9, 129.8, 128.1, 126.2, 125.9, 123.5, 117.6, 115.9, 69.6, 48.8, 45.3, 21.6; HRMS (ESI) calcd for C<sub>18</sub>H<sub>17</sub>ClN<sub>2</sub>O<sub>5</sub>S<sub>2</sub> [M+H]<sup>+</sup>: 441.0340, found: 441.0353.

**10-bromo-3-methylene-1-tosyl-1,3,4,11b-tetrahydro-2H-benzo[e]pyrimido[1,2-c][1,2,3]oxathiazine 6,6-dioxide (5aq)**

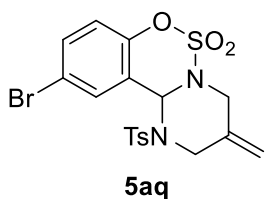

Prepared according to the general procedure as described above in 52% yield. It was purified by flash chromatography (6.7% EtOAc/PE) to afford a white solid. mp = 250-256 °C; <sup>1</sup>H NMR (800 MHz, CDCl<sub>3</sub>) δ 7.86 – 7.30 (m, 6H), 7.00 – 6.93 (m, 2H), 4.83 (d, *J* = 31.2 Hz, 2H), 4.38 (d, *J* = 16.1 Hz, 1H), 3.68 (dd, *J* = 25.2, 14.4 Hz, 2H), 3.33 (d, *J* = 12.7 Hz, 1H), 2.45 (s, 3H); <sup>13</sup>C NMR (201 MHz, CDCl<sub>3</sub>) δ 149.4, 144.7, 135.6, 134.5, 130.9, 130.2, 129.8, 128.1, 120.0, 119.2, 117.8, 115.9, 69.2, 48.7, 45.4, 21.6; HRMS (ESI) calcd for C<sub>18</sub>H<sub>17</sub>BrN<sub>2</sub>O<sub>5</sub>S<sub>2</sub> [M+H]<sup>+</sup>: 484.9835, found: 484.9821.

**9-bromo-3-methylene-1-tosyl-1,3,4,11b-tetrahydro-2H-benzo[e]pyrimido[1,2-c][1,2,3]oxathiazine 6,6-dioxide (5ar)**

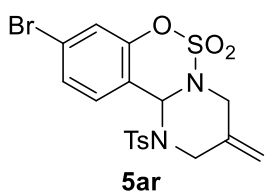

Prepared according to the general procedure as described above in 99% yield. It was purified by flash chromatography (6.7% EtOAc/PE) to afford a white solid. mp = 200-204 °C; <sup>1</sup>H NMR (400 MHz, CDCl<sub>3</sub>) δ 7.82 – 7.58 (m, 2H), 7.47 – 7.35 (m, 2H), 7.32 – 7.13 (m, 3H), 6.84 (s, 1H), 4.75 (dt, *J* = 9.9, 1.5 Hz, 2H), 4.27 (d, *J* = 16.0 Hz, 1H), 3.68 – 3.48 (m, 2H), 3.30 – 3.21 (m, 1H), 2.38 (s, 3H); <sup>13</sup>C NMR (101 MHz, CDCl<sub>3</sub>) δ 150.6, 144.7, 135.7, 131.0, 129.8, 129.6, 128.9, 128.1, 124.5, 121.5, 115.9, 114.8, 69.3, 48.7, 45.2, 21.6; HRMS (ESI) calcd for C<sub>18</sub>H<sub>17</sub>BrN<sub>2</sub>O<sub>5</sub>S<sub>2</sub> [M+H]<sup>+</sup>: 484.9835, found: 484.9799.

**3-methylene-1-tosyl-1,3,4,13c-tetrahydro-2H-naphtho[1,2-e]pyrimido[1,2-c][1,2,3]oxathiazine 6,6-dioxide (5at)**

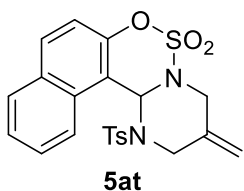

Prepared according to the general procedure as described above in 67% yield. It was purified by flash chromatography (6.7% EtOAc/PE) to afford a white solid. mp = 212-216 °C; <sup>1</sup>H NMR (800 MHz, CDCl<sub>3</sub>) δ 8.83 (d, *J* = 8.7 Hz, 1H), 8.04 – 7.02 (m, 9H), 4.76 (d, *J* = 58.5 Hz, 2H), 4.30 (d, *J* = 16.6 Hz, 1H), 3.63 (d, *J* = 13.7 Hz, 1H), 3.34 (dd, *J* = 15.2, 12.4 Hz, 2H), 2.47 (s, 3H); <sup>13</sup>C NMR (201 MHz, CDCl<sub>3</sub>) δ 149.7, 144.8, 135.6, 132.7, 131.9, 131.7, 130.5, 129.7, 128.8, 128.5, 128.3, 126.1, 124.1, 117.7, 114.9, 109.1, 70.7, 49.2, 45.8, 21.7; HRMS (ESI) calcd for C<sub>22</sub>H<sub>20</sub>N<sub>2</sub>O<sub>5</sub>S<sub>2</sub> [M+H]<sup>+</sup>: 457.0886, found: 457.0880.

**Scaled-up Synthesis of the Product 3aa and 5aa**

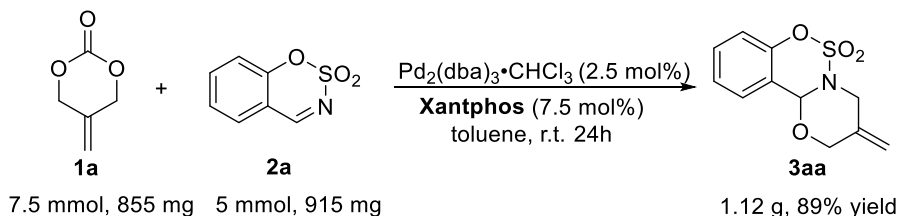

Under argon atmosphere, to a mixture of 2-methylenetetrahydro-2H-pyrimido[1,2-c][1,2,3]oxathiazine 6,6-dioxide **1a** (7.5 mmol), Sulfamate-derived cyclic imine **2a** (5.0 mmol) and catalyst Pd<sub>2</sub>(dba)<sub>3</sub>·CHCl<sub>3</sub> (2.5 mol%, 0.125 mmol) / **Xantphos** (7.5 mol%, 0.375 mmol) in a Schlenk tube, 75 mL of toluene were added at room temperature. The resulting mixture was stirred until the starting

material were completely consumed (monitored by TLC) and then was concentrated to dryness. The residue was purified through flash column chromatography (6.7% EtOAc / PE) to afford the corresponding cycloaddition product **3aa** with 89% yield (1.12 g).

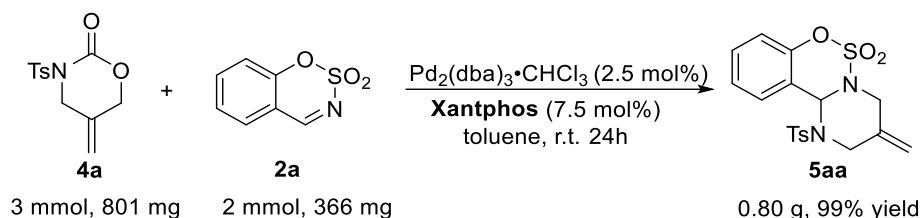

Under argon atmosphere, to a mixture of *N*-tosyl carbamate **4a** (3.0 mmol), Sulfamate-derived cyclic imine **2a** (2.0 mmol) and catalyst  $\text{Pd}_2(\text{dba})_3 \cdot \text{CHCl}_3$  (2.5 mol%, 0.075 mmol) / **Xantphos** (7.5 mol %, 0.225 mmol) in a Schlenk tube, 30 mL of toluene were added at room temperature. The resulting mixture was stirred until the starting material were completely consumed (monitored by TLC) and then was concentrated to dryness. The residue was purified through flash column chromatography (6.7% EtOAc / PE) to afford the corresponding cycloaddition product **5aa** with 99% yield (0.80 g).

### Transformations of the Product **3aa** and **5aa**

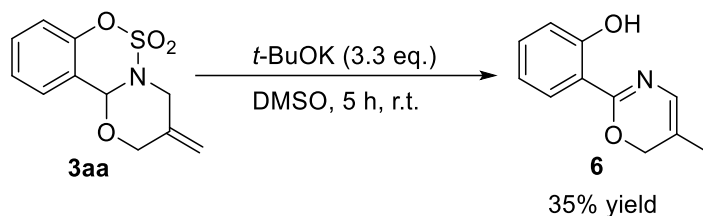

To a dry tube equipped with a stirring bar added **3aa** (0.10 mmol),  $\text{KO}t\text{-Bu}$  (0.33 mmol) and anhydrous DMSO (1 mL). The reaction mixture was stirred under an atmosphere of argon at r.t. for 5 h. The reaction was quenched with  $\text{H}_2\text{O}$  and extracted with DCM three times. The organic phase was dried over anhydrous  $\text{MgSO}_4$  and the solvent was removed under reduced pressure. Then, the crude mixture was purified by flash chromatography (16.7% EtOAc/PE) to afford a white solid **6** (6.6 mg, 35% yield). **6: 2-(5-methyl-6H-1,3-oxazin-2-yl)phenol**, mp = 110-114 °C;  $^1\text{H}$  NMR (800 MHz,  $\text{CDCl}_3$ )  $\delta$  13.46 (s, 1H), 7.68 (dd,  $J = 7.9, 1.8$  Hz, 1H), 7.32 (ddd,  $J = 8.7, 7.2, 1.8$  Hz, 1H), 7.01 – 6.74 (m, 2H), 6.26 – 6.23 (m, 1H), 4.81 (q,  $J = 1.4$  Hz, 2H), 1.69 (q,  $J = 1.4$  Hz, 3H);  $^{13}\text{C}$  NMR (201 MHz,



CDCl<sub>3</sub>)  $\delta$  161.0, 158.1, 133.1, 127.2, 124.5, 118.2, 117.4, 117.2, 113.6, 67.6, 16.1. HRMS (ESI) calcd for C<sub>11</sub>H<sub>11</sub>NO<sub>2</sub> [M+H]<sup>+</sup>: 190.0863, found: 190.0861.

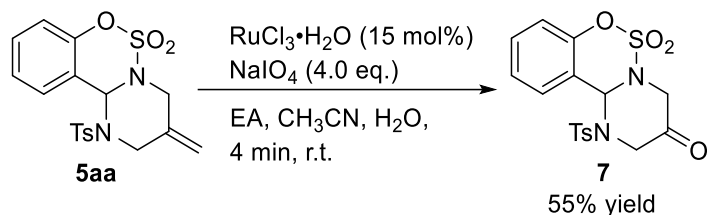

A solution of NaIO<sub>4</sub> (85 mg, 0.4 mmol) in water (0.6 mL) was added to a solution of RuCl<sub>3</sub>·H<sub>2</sub>O (3.1 mg, 15 mol%) in MeCN (0.8 mL). This mixture was stirred 2 minutes and then a solution of the **5aa** (0.1 mmol) in EA (0.8 mL) was added. The mixture was stirred for 10 minutes until TLC indicates complete consumption of the starting material. MgSO<sub>4</sub> was added and the resulting heterogeneous mixture was washed with EA, and finally evaporated under reduced pressure. Purified by flash chromatography (6.7% EtOAc/PE) to afford a transparency liquid **7** (22.4 mg, 55% yield). **7**: **1-tosyl-1,11b-dihydro-2H-benzo[e]pyrimido[1,2-c][1,2,3]oxathiazin-3(4H)-one 6,6-dioxide**, <sup>1</sup>H NMR (800 MHz, CDCl<sub>3</sub>)  $\delta$  7.82 (dd, *J* = 8.4, 2.0 Hz, 2H), 7.65 – 7.01 (m, 6H), 4.35 (d, *J* = 19.1 Hz, 1H), 3.71 (d, *J* = 19.2 Hz, 1H), 3.53 (d, *J* = 17.7 Hz, 1H), 3.31 (d, *J* = 17.7 Hz, 1H), 2.48 (d, *J* = 2.0 Hz, 3H); <sup>13</sup>C NMR (201 MHz, CDCl<sub>3</sub>)  $\delta$  194.8, 150.6, 145.7, 134.4, 132.1, 130.4, 127.9, 127.3, 126.9, 118.9, 115.0, 68.9, 52.6, 49.3, 21.7; HRMS (ESI) calcd for C<sub>17</sub>H<sub>16</sub>N<sub>2</sub>O<sub>6</sub>S<sub>2</sub> [M+H]<sup>+</sup>: 409.0523, found: 409.0519.

# $^1\text{H}$ , $^{13}\text{C}$ and $^{19}\text{F}$ NMR Spectra of All Products

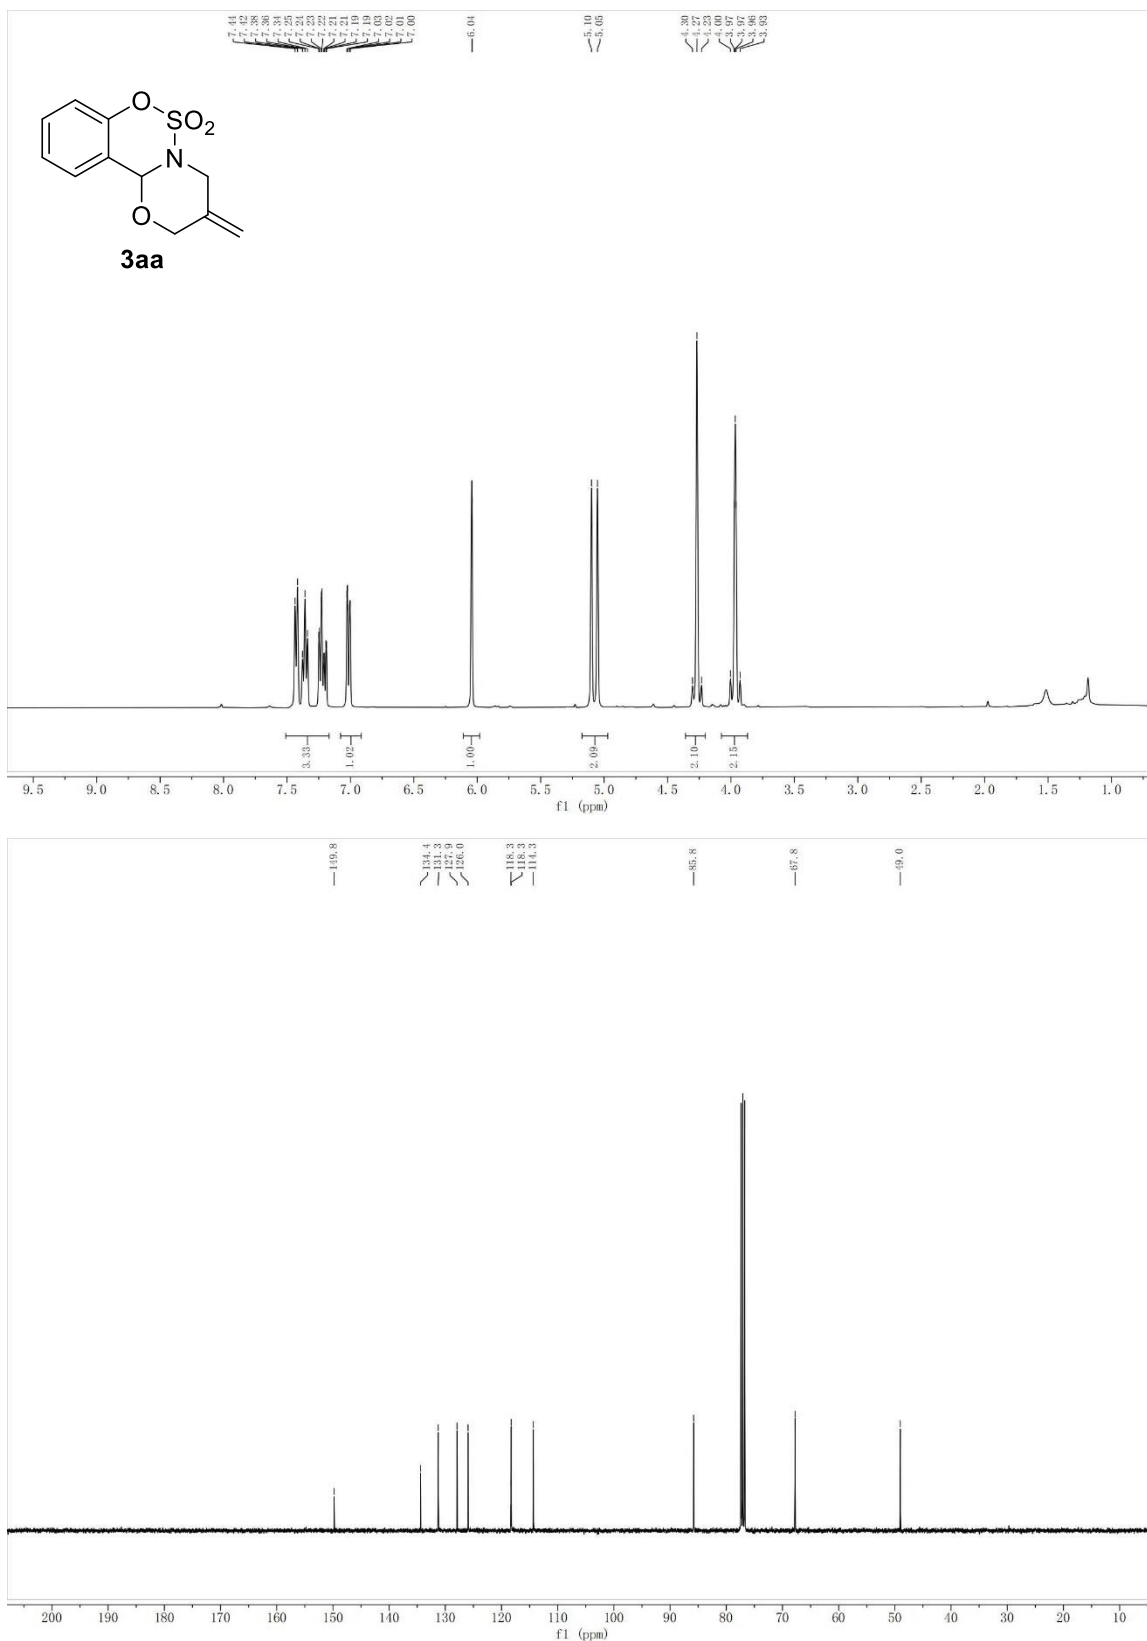

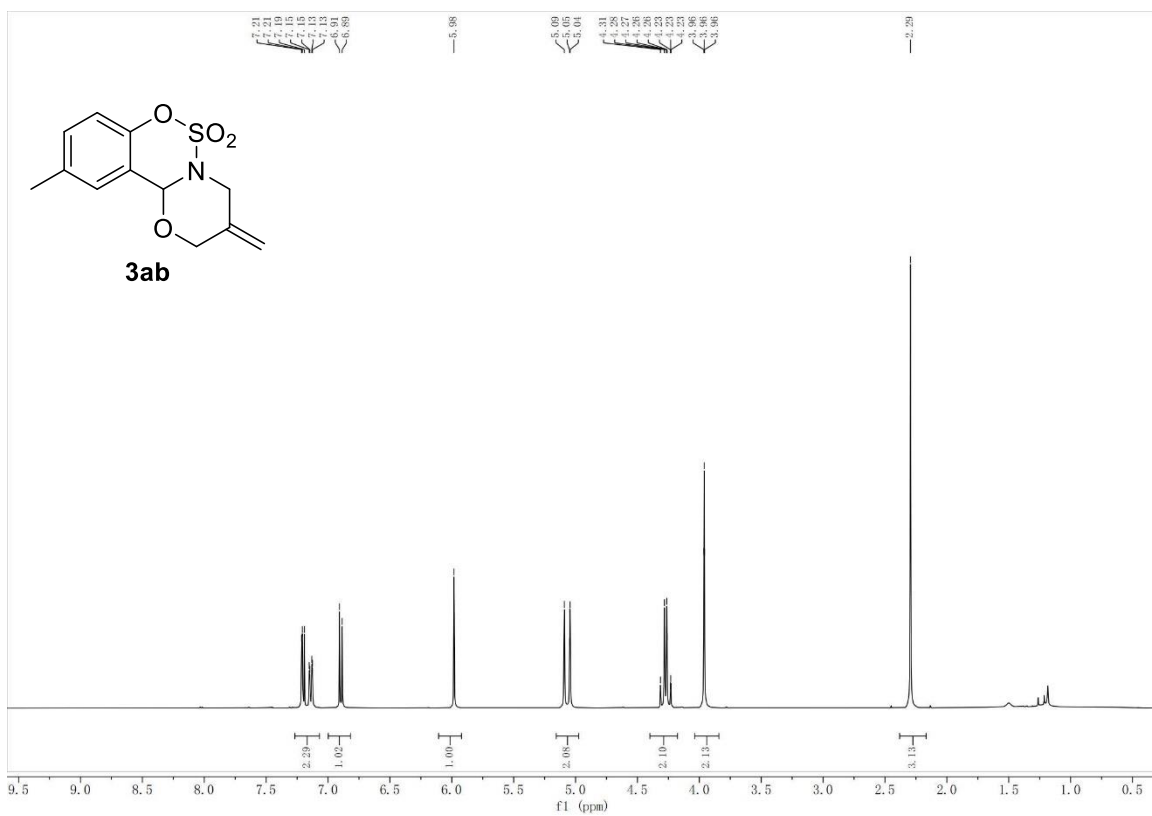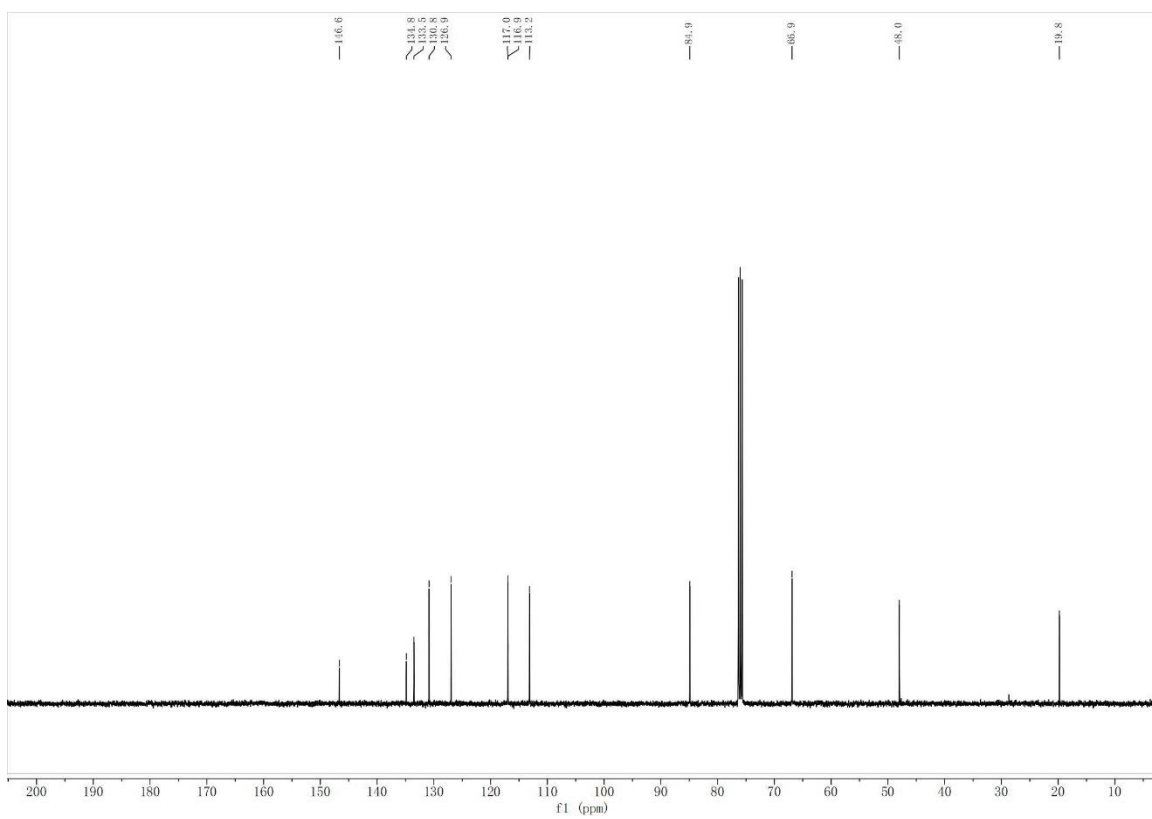

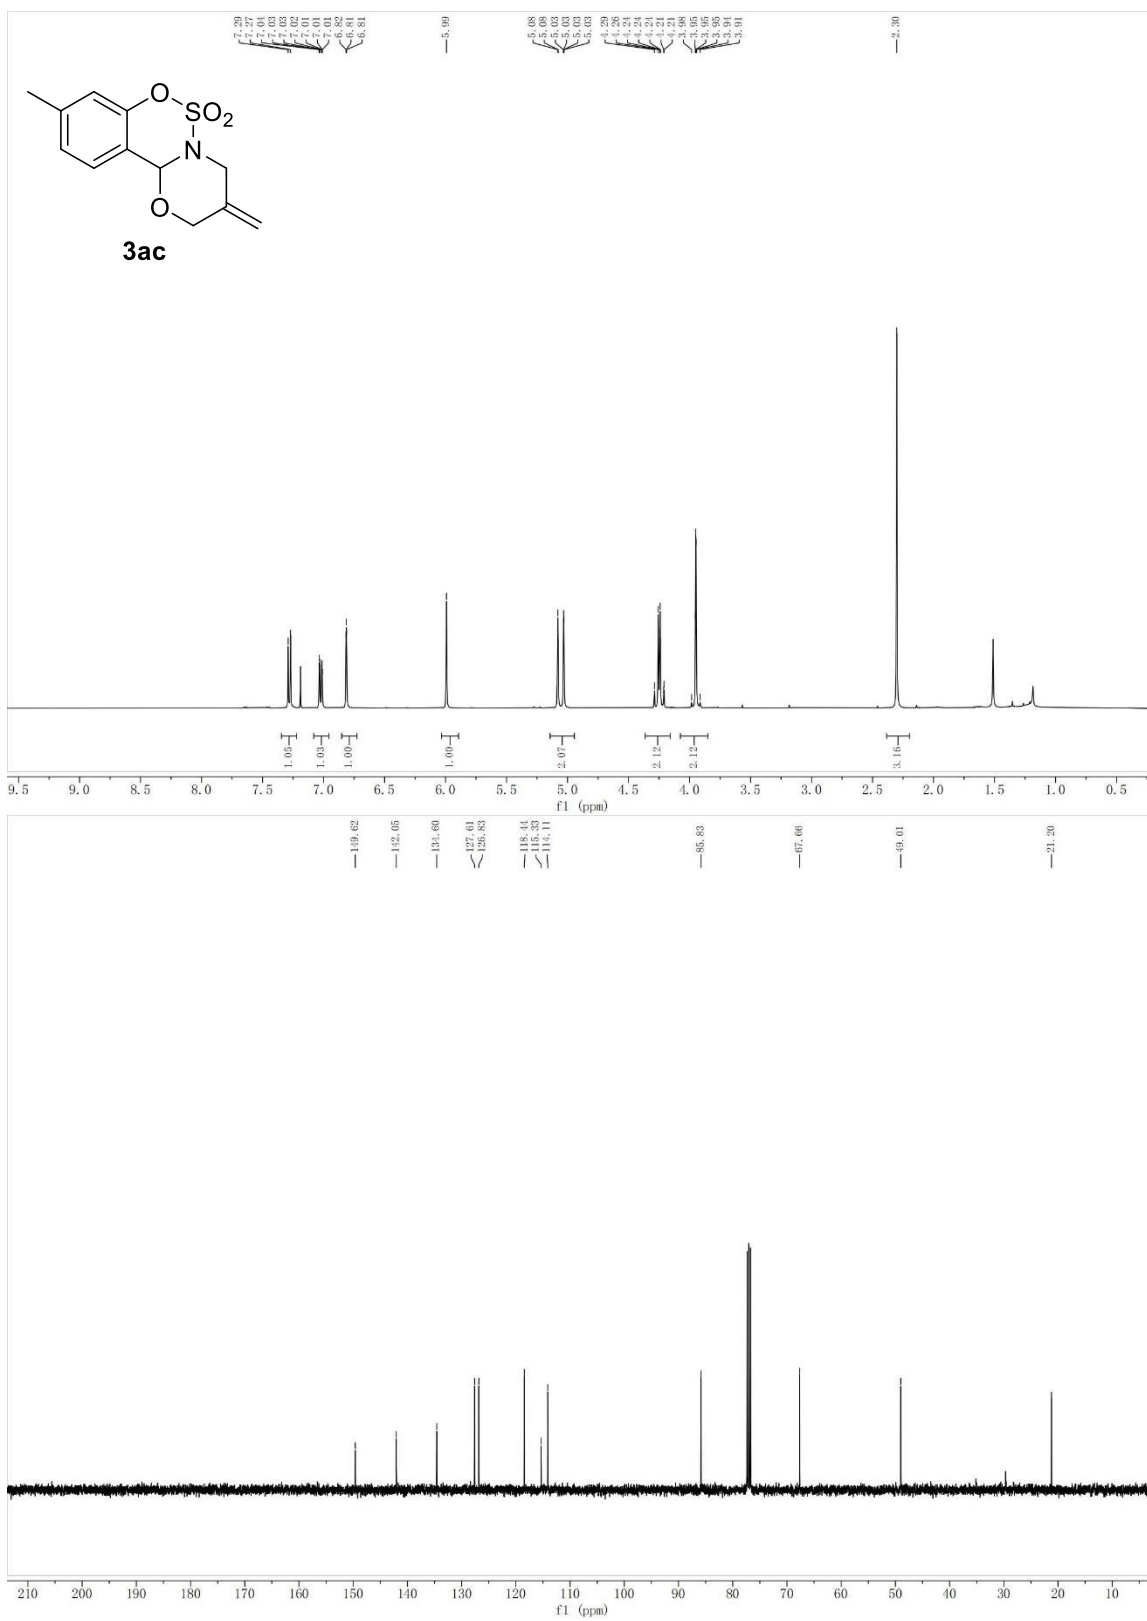

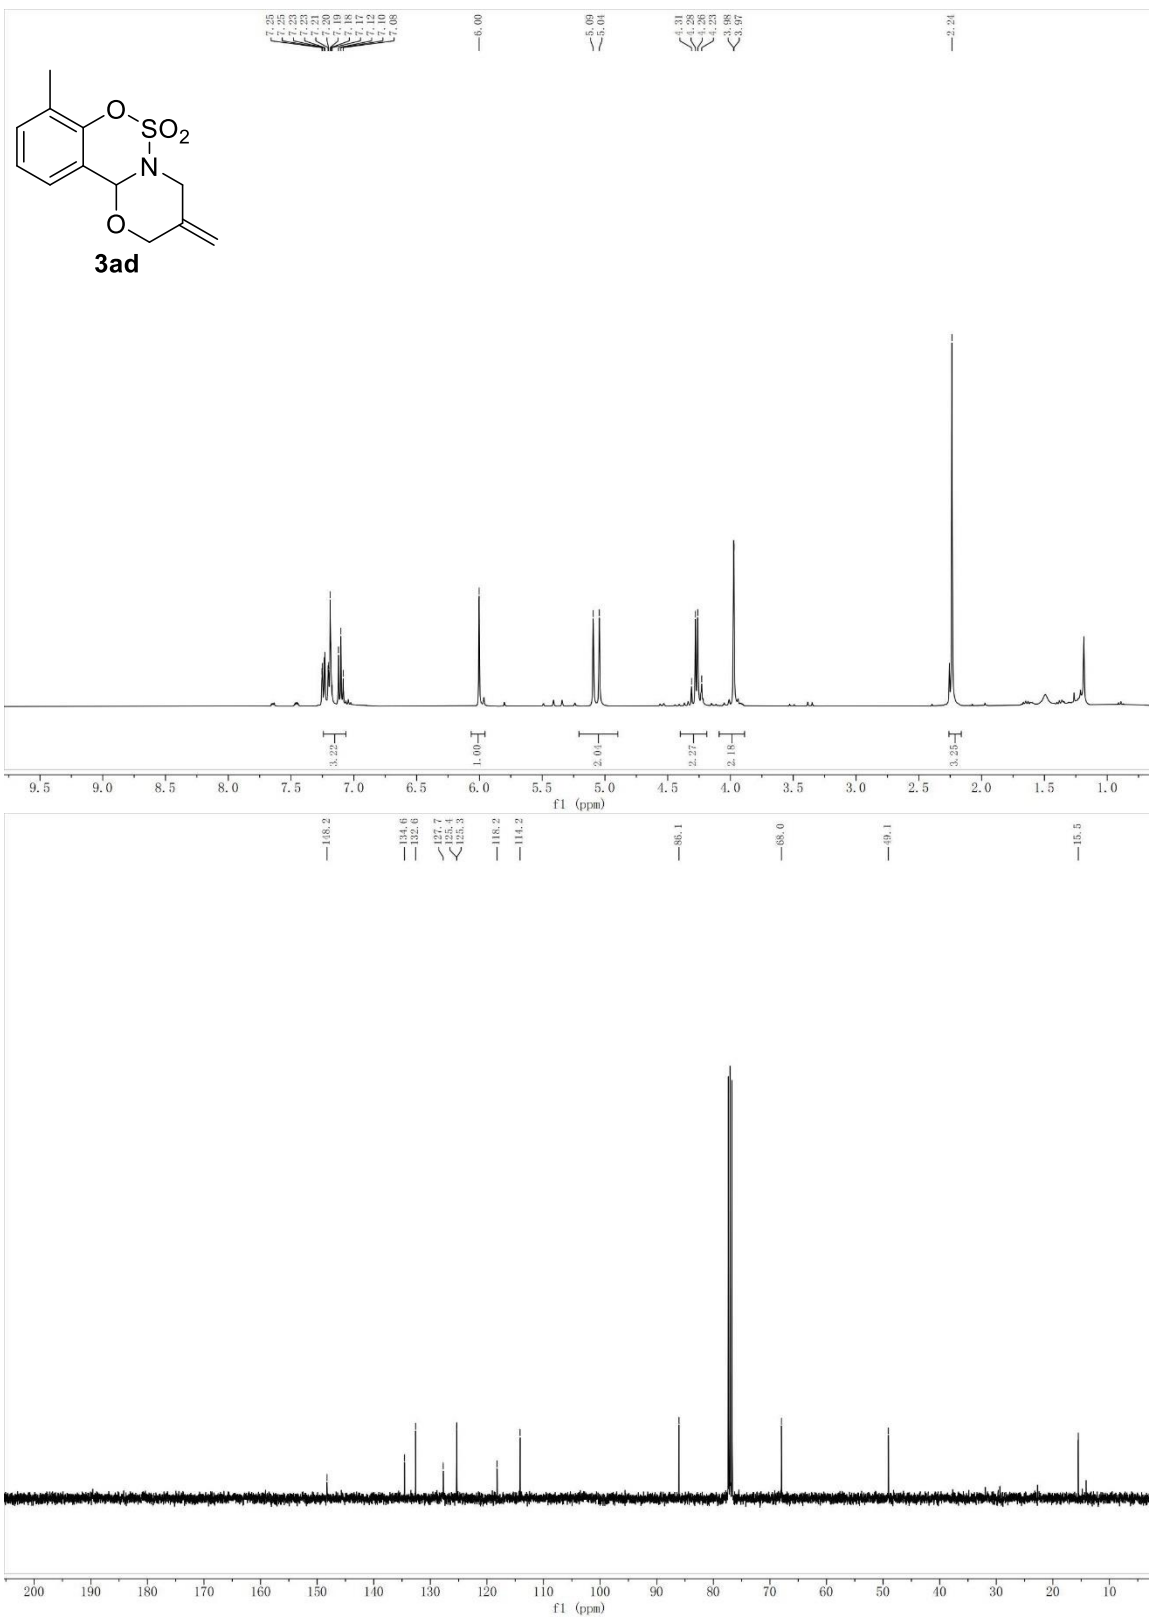

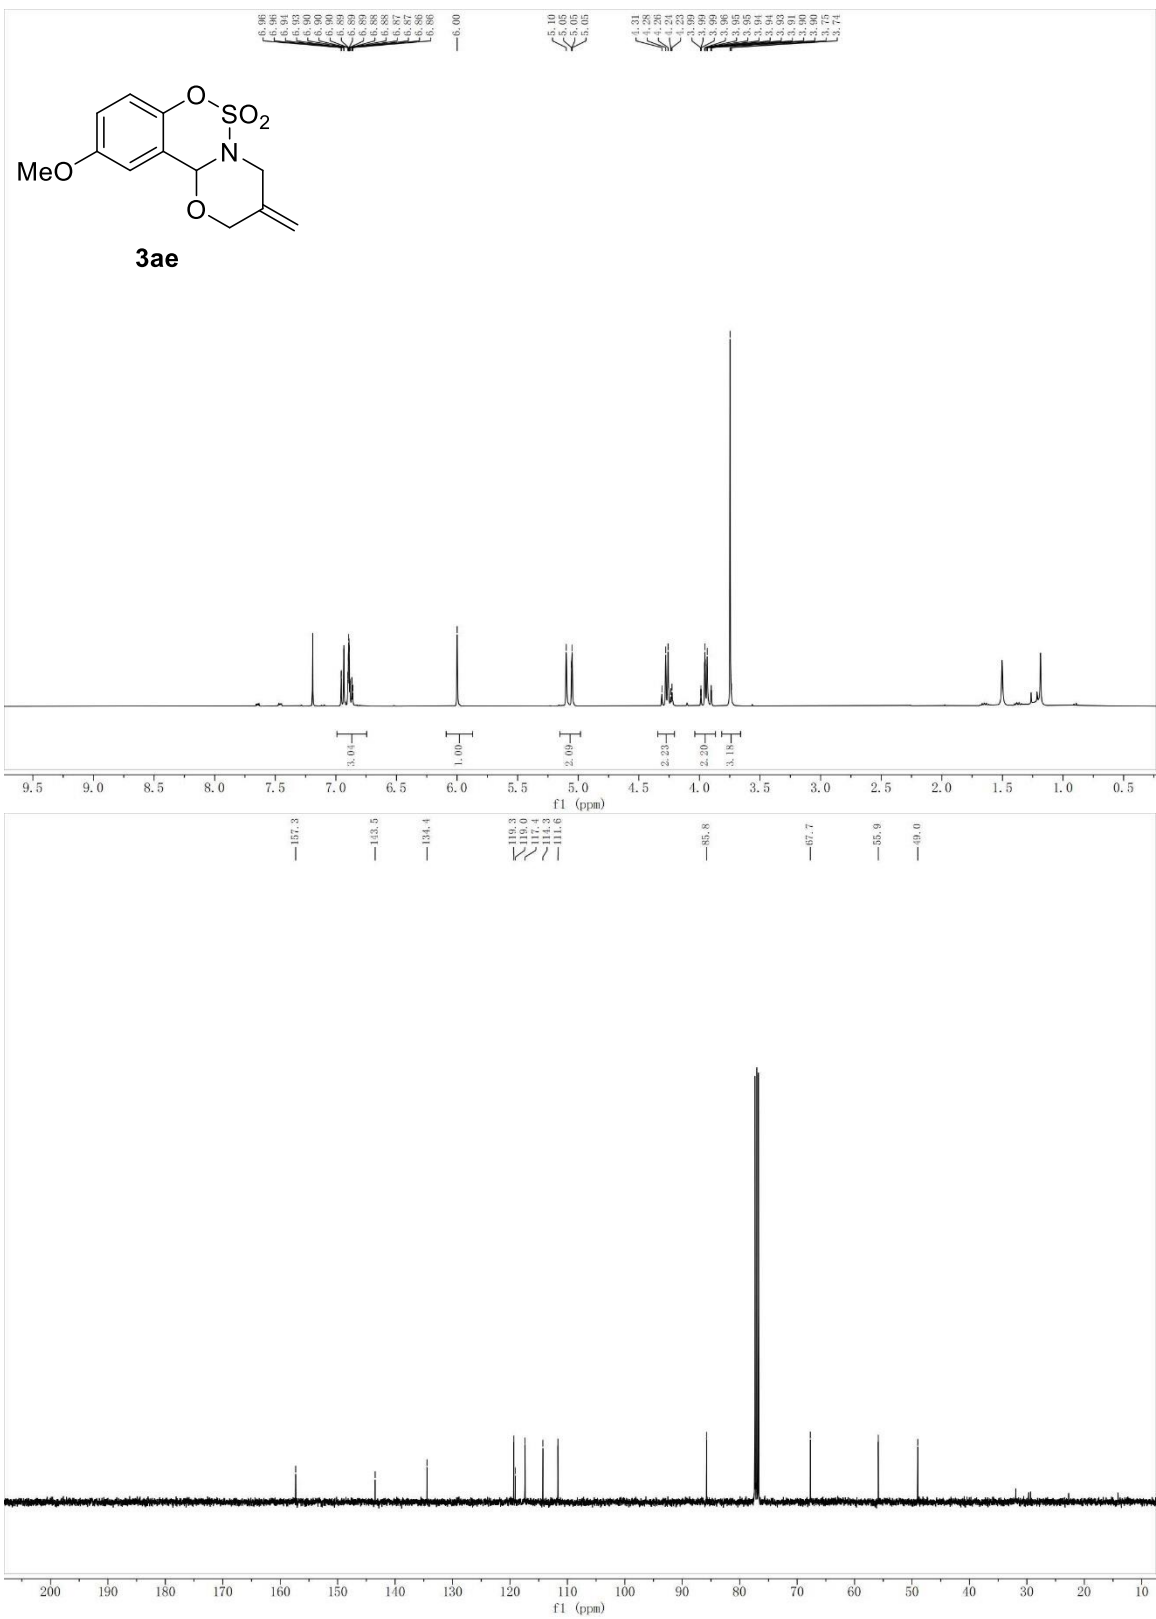

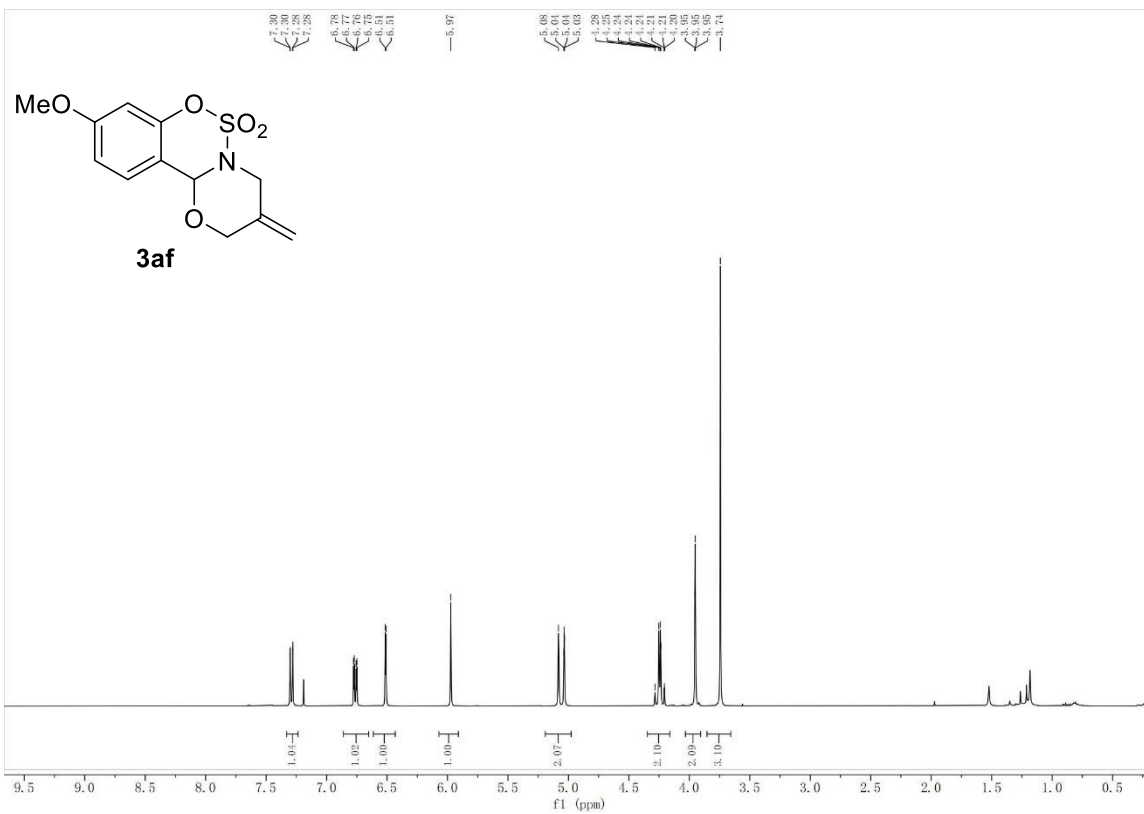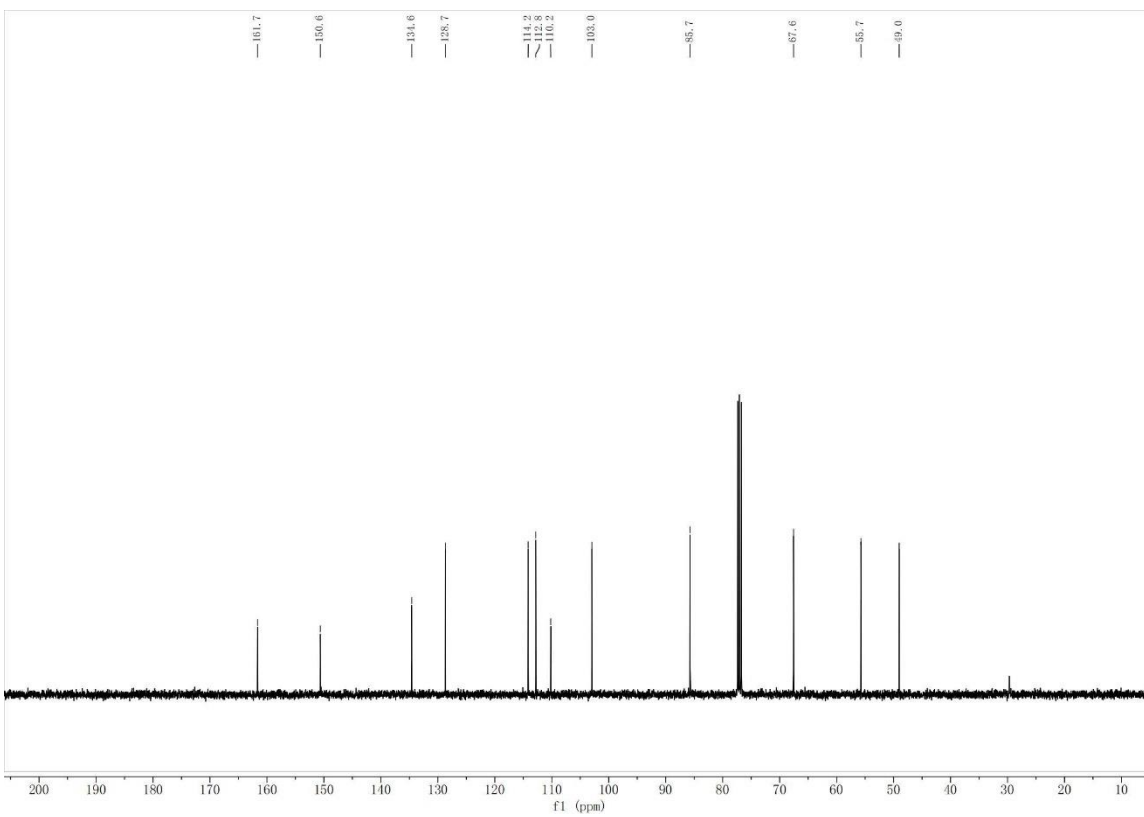





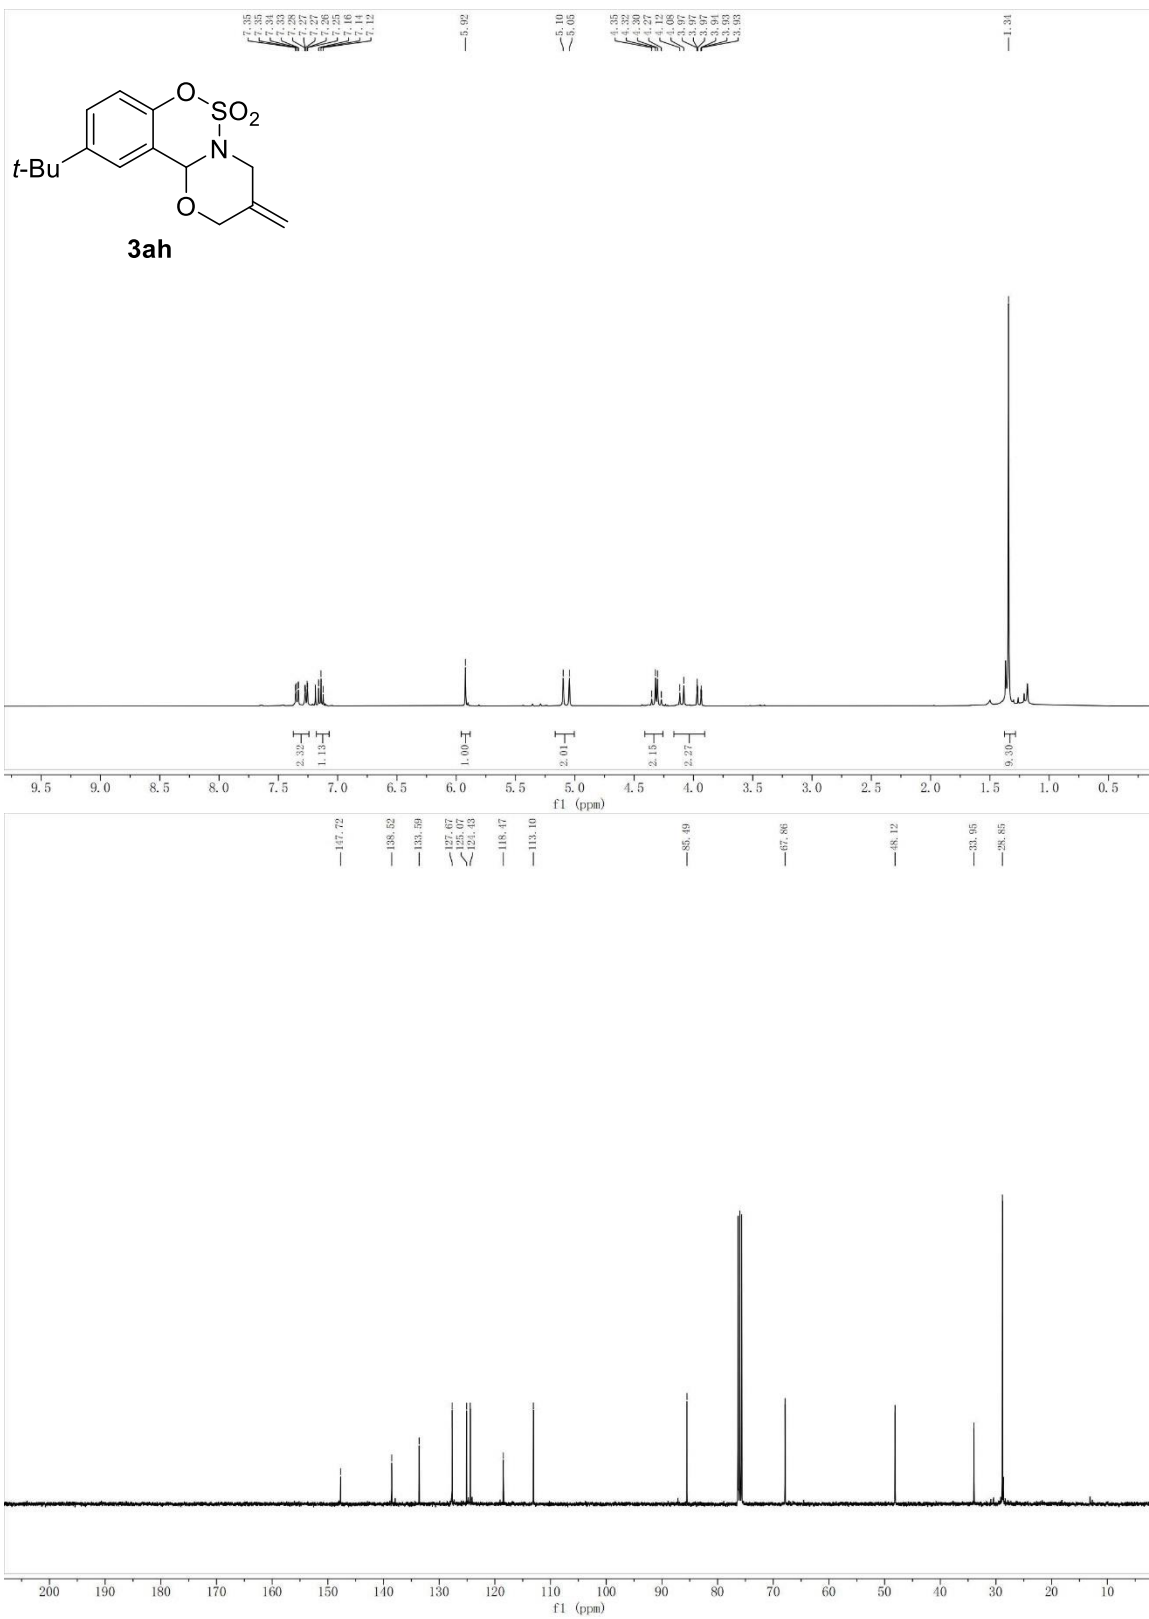

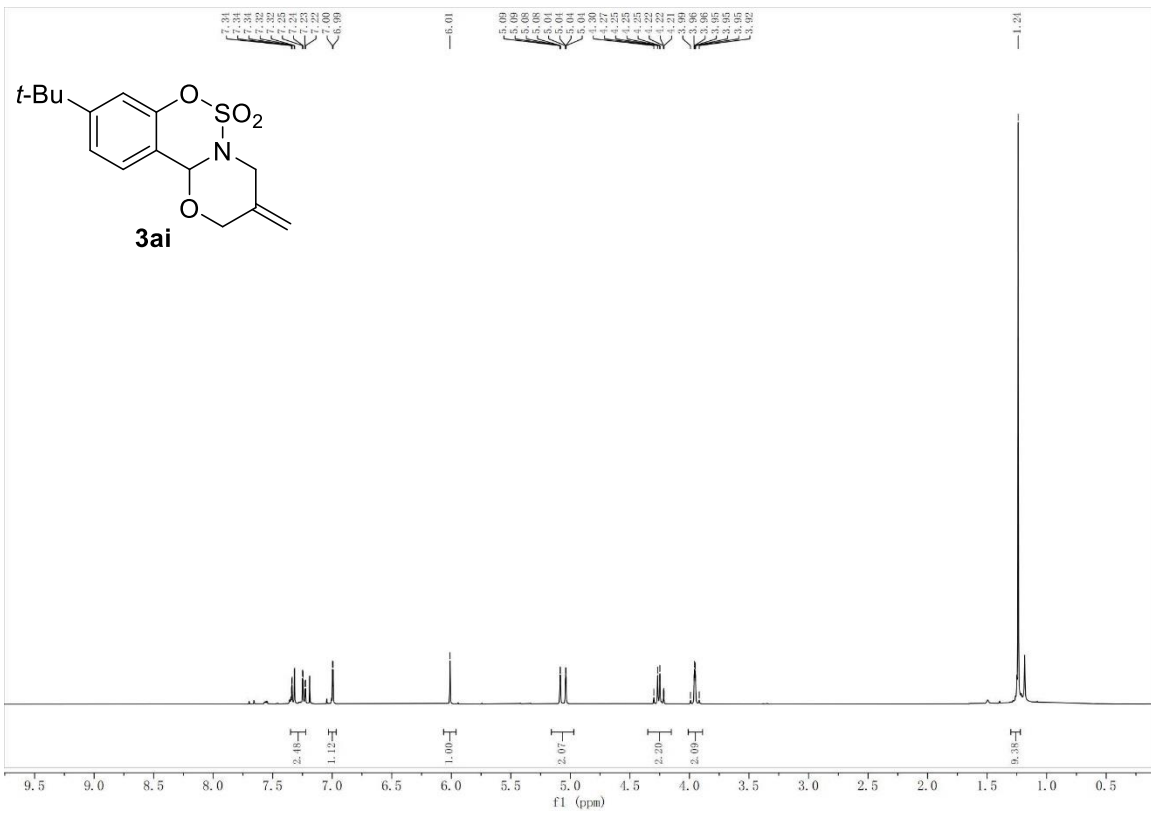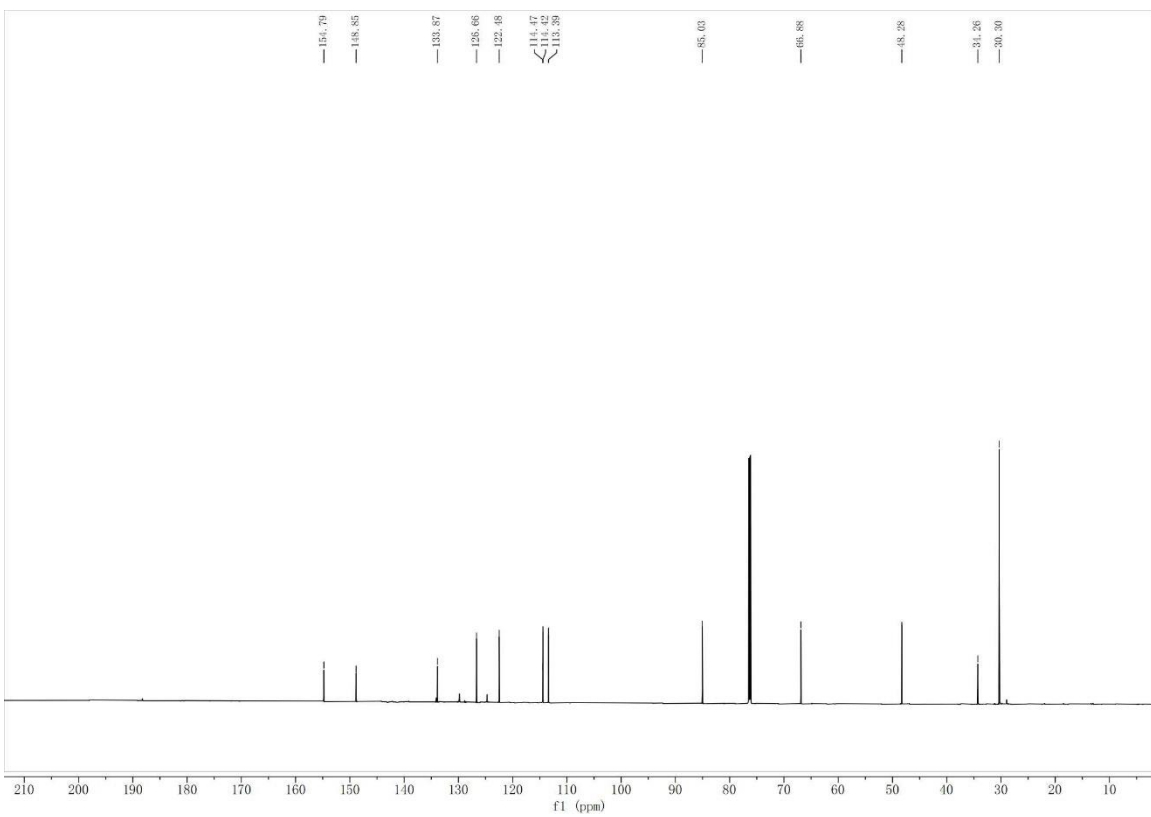

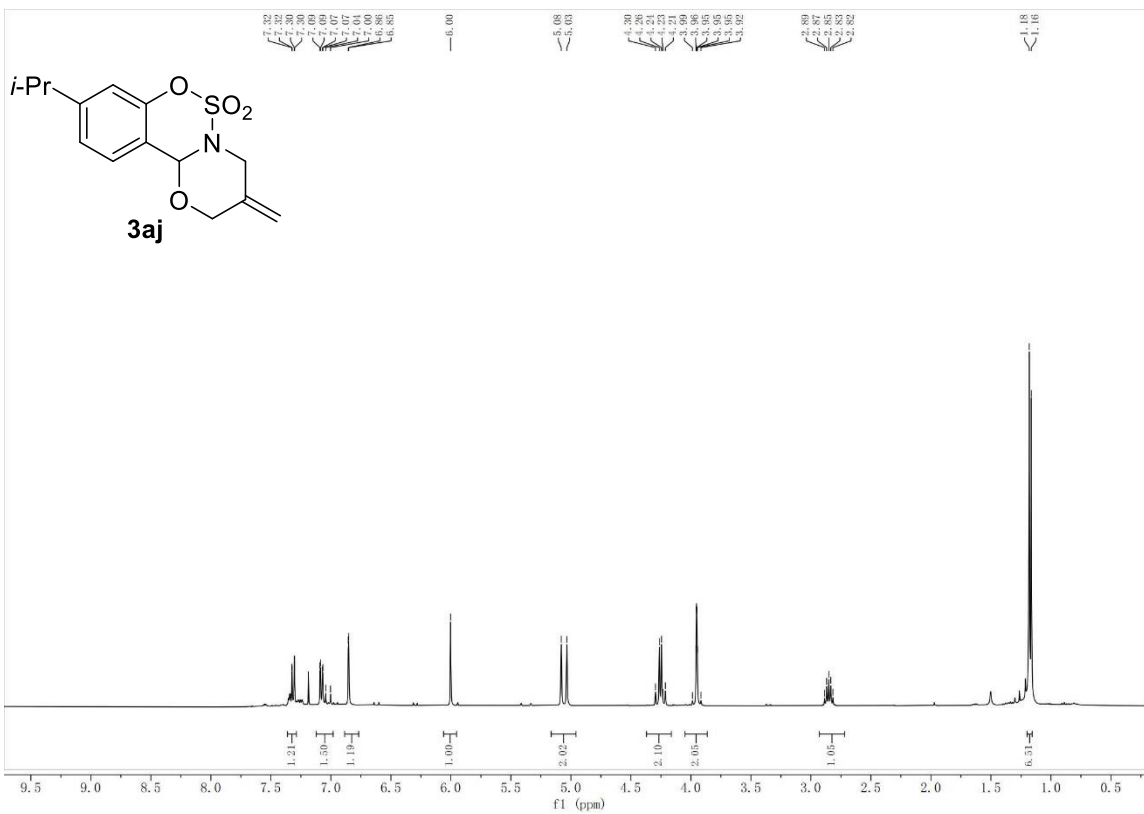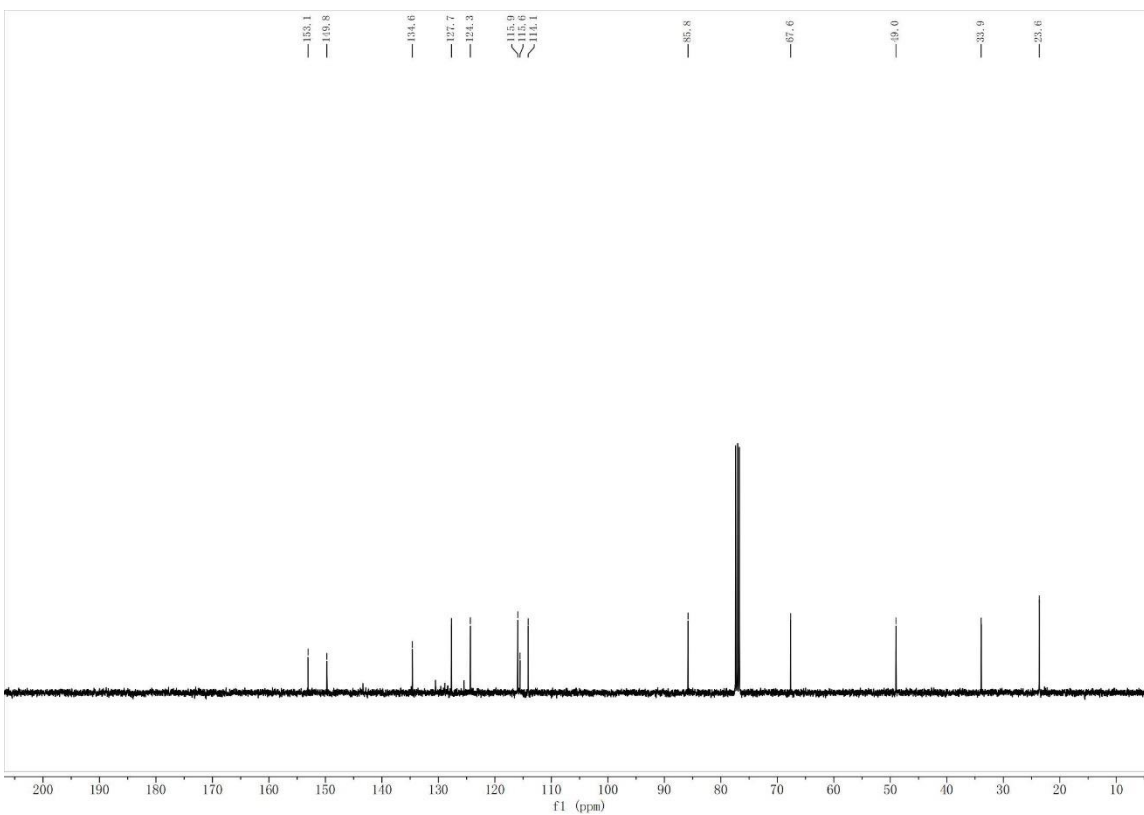

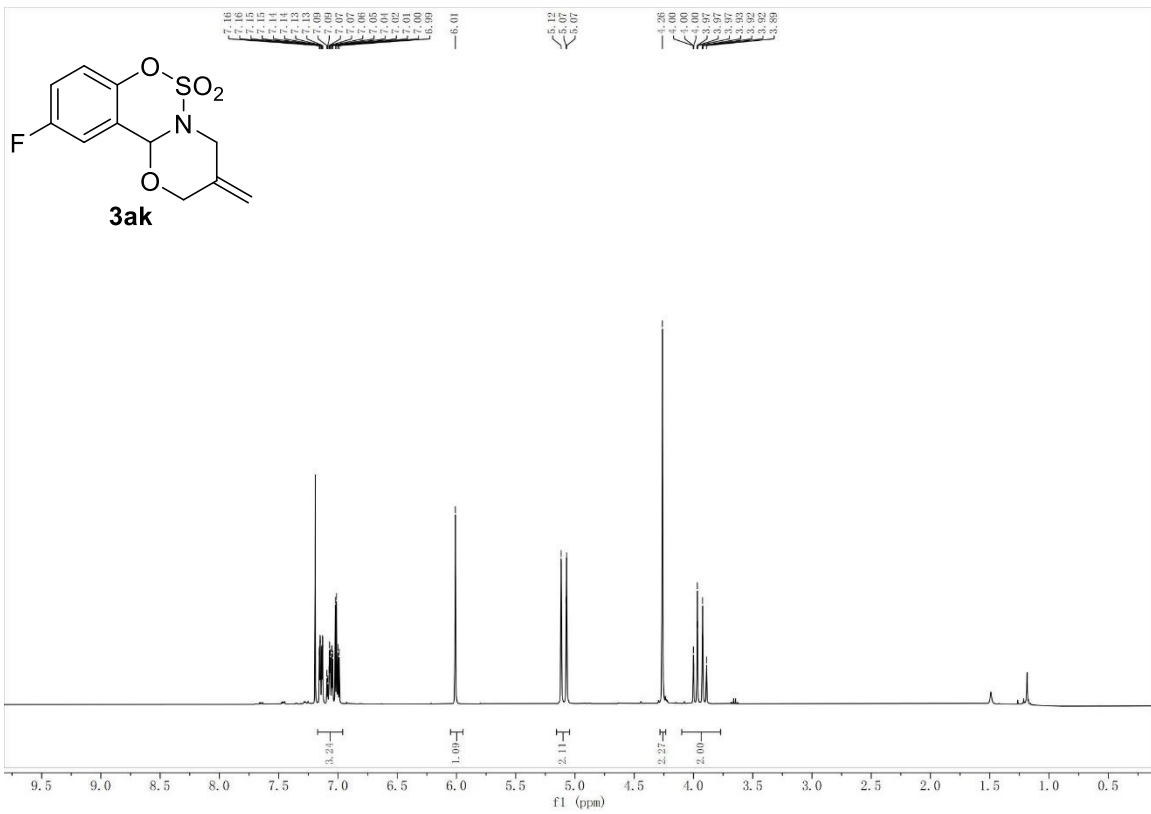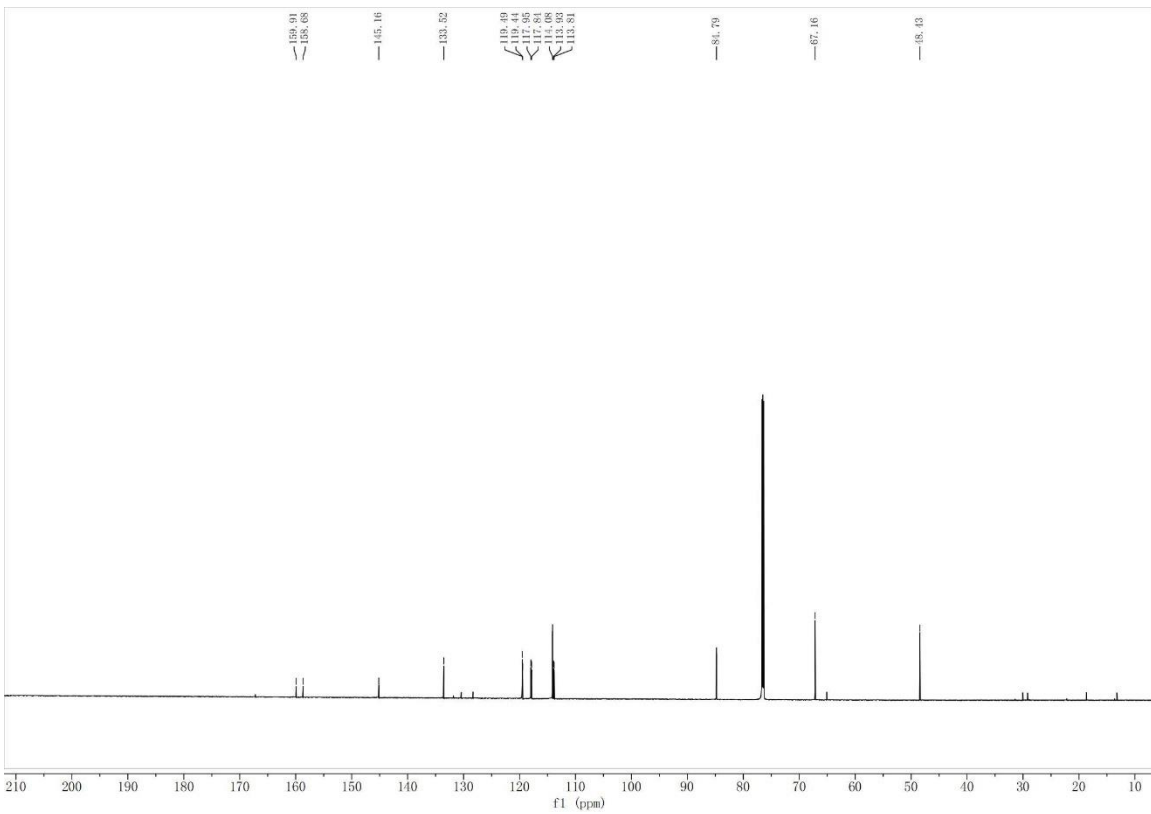

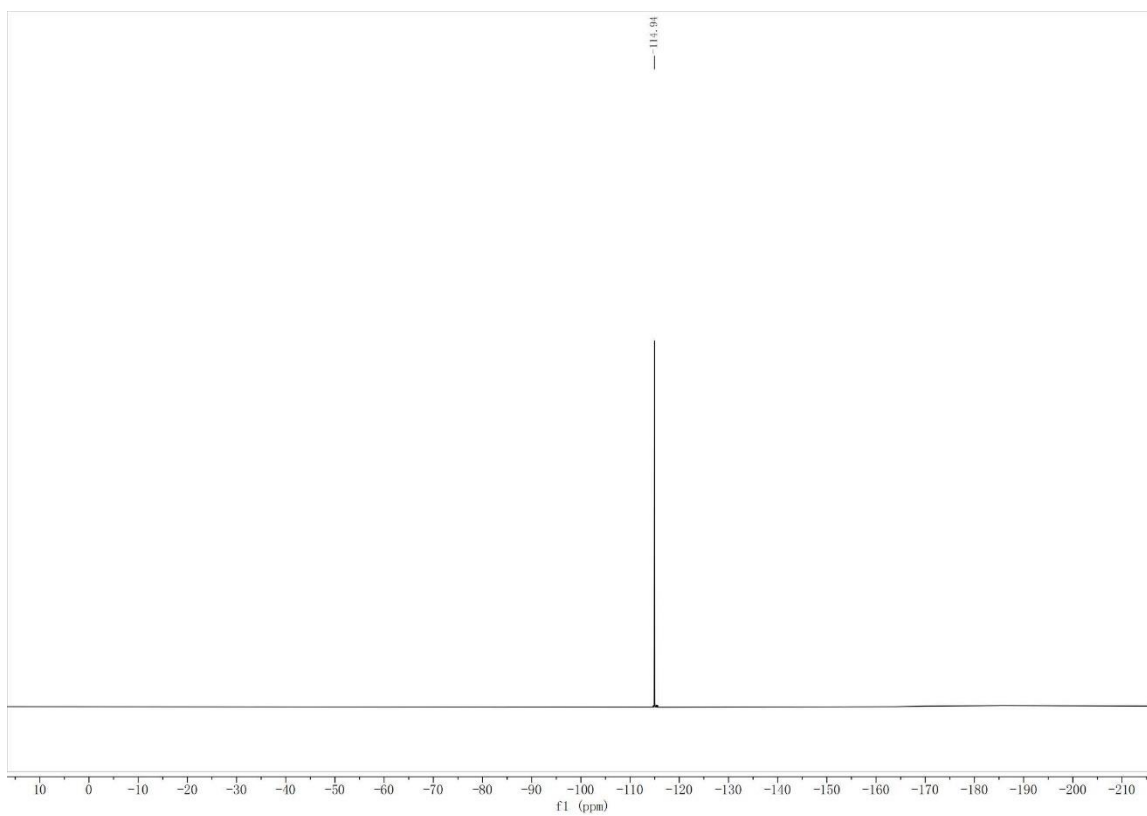

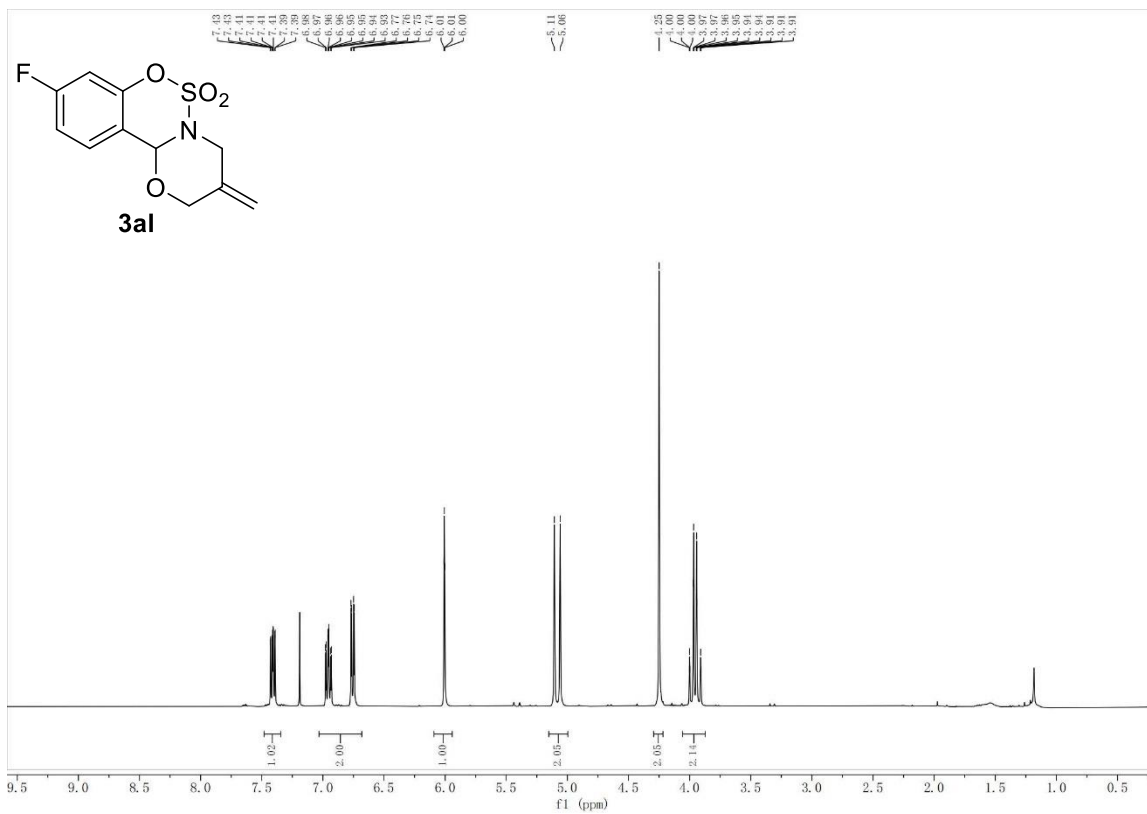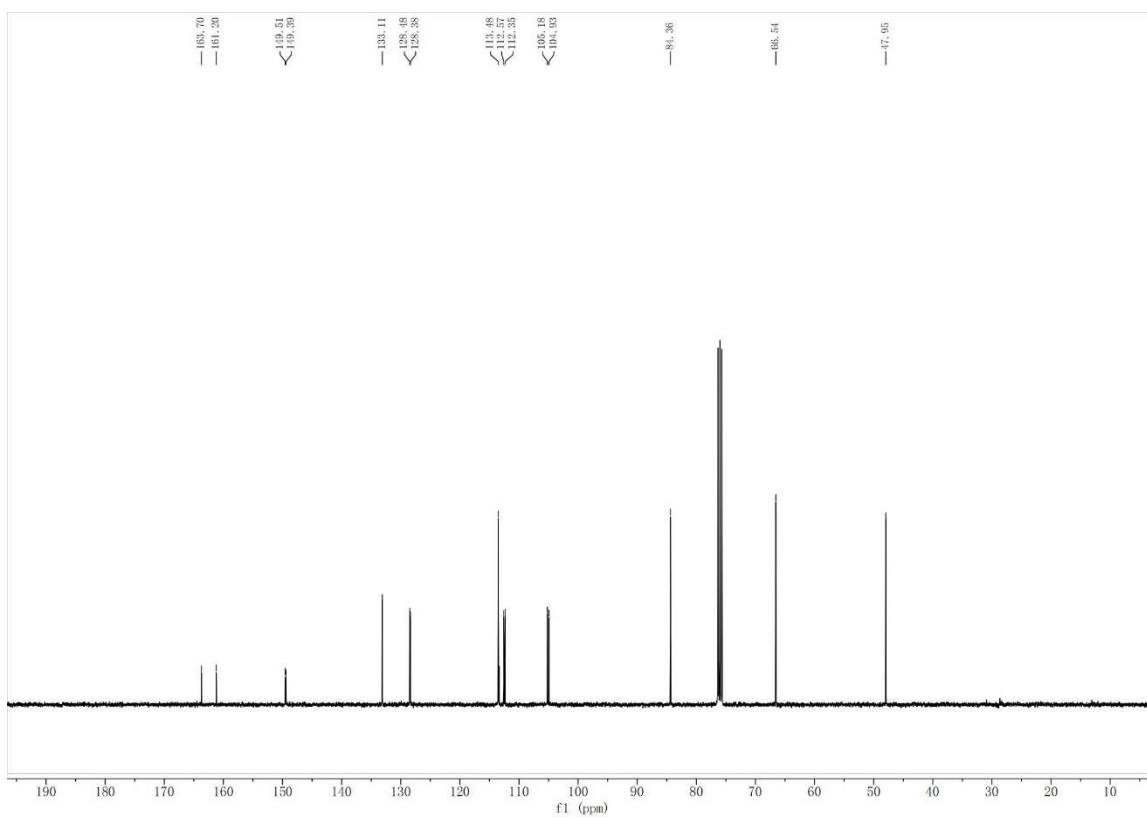

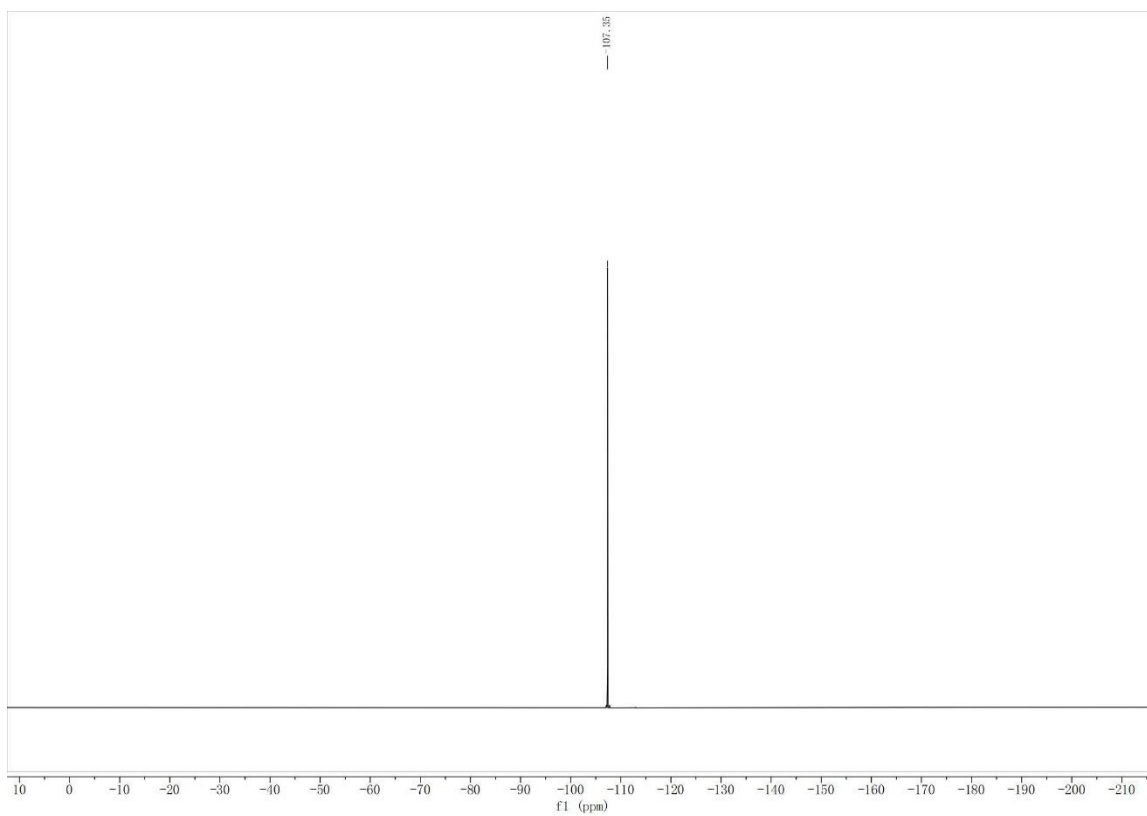

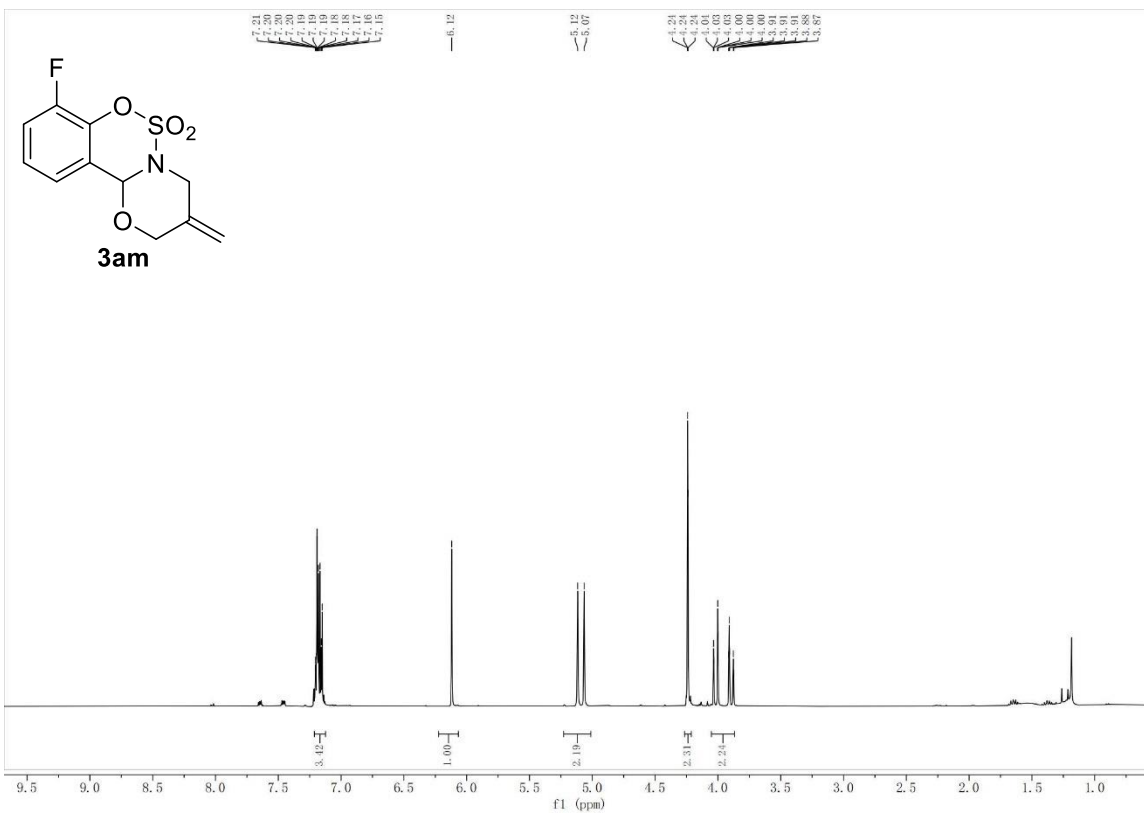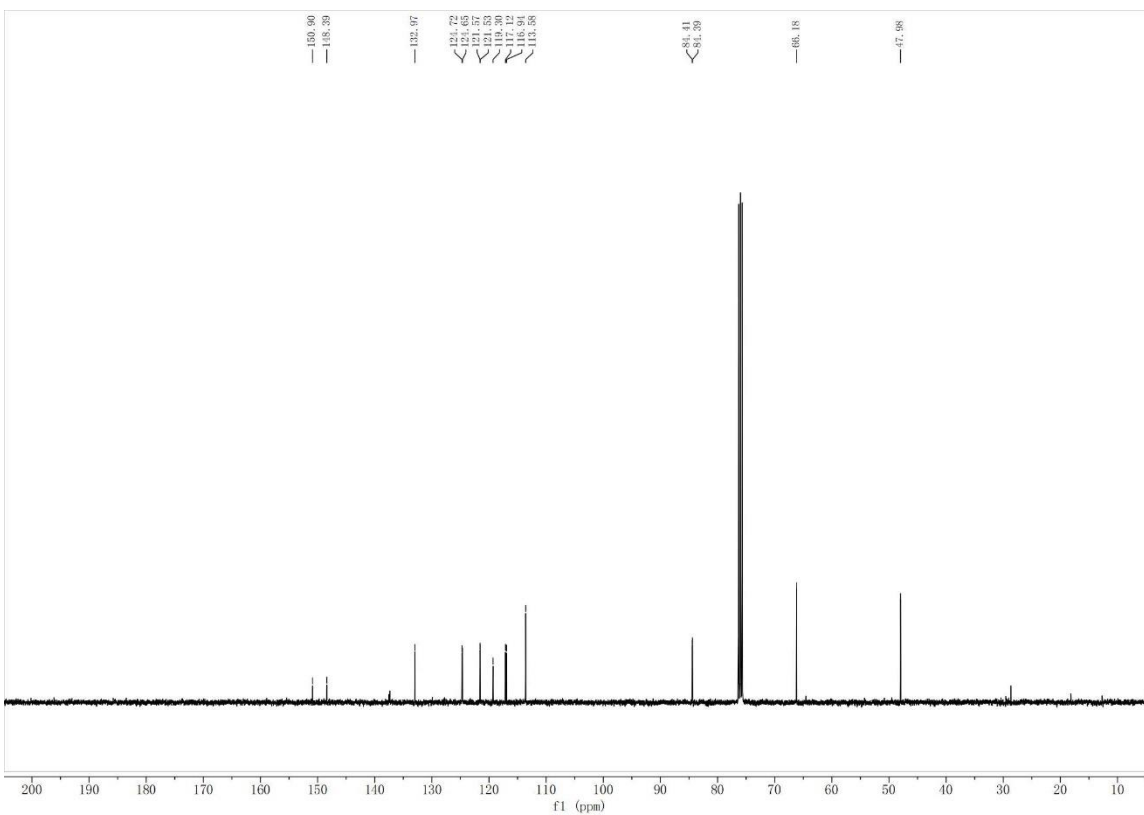



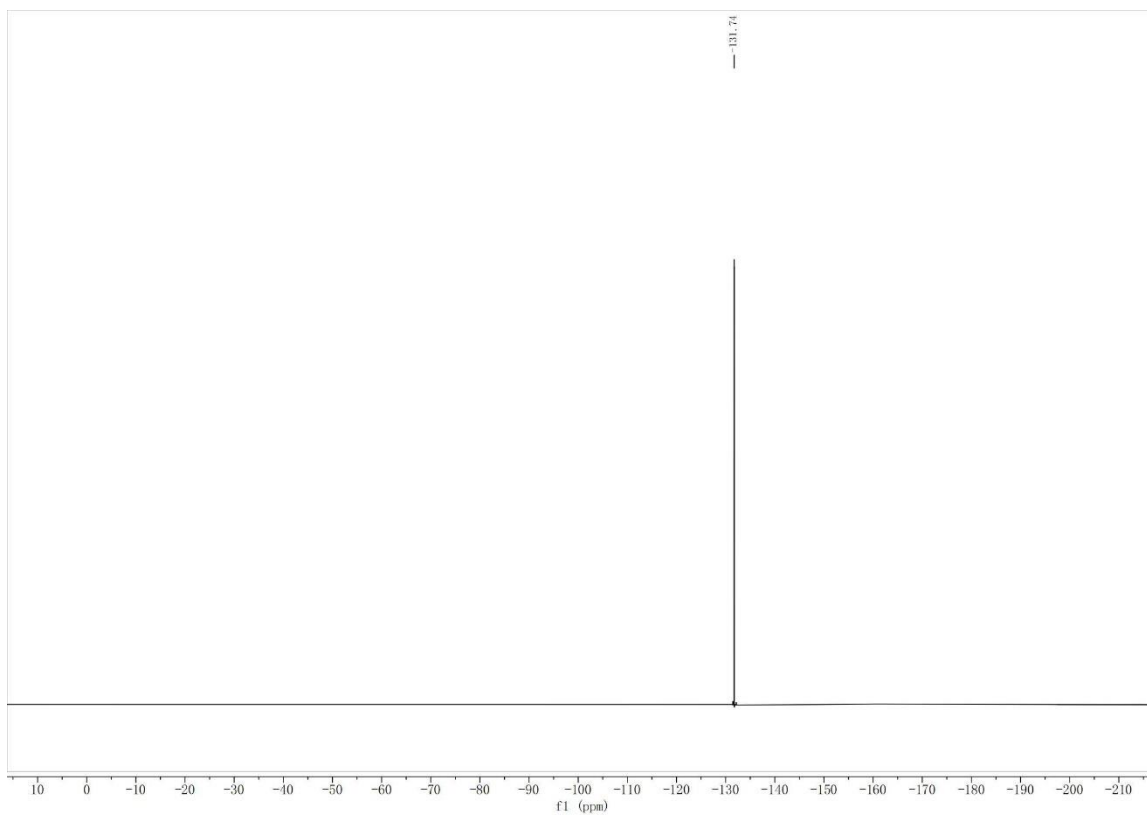

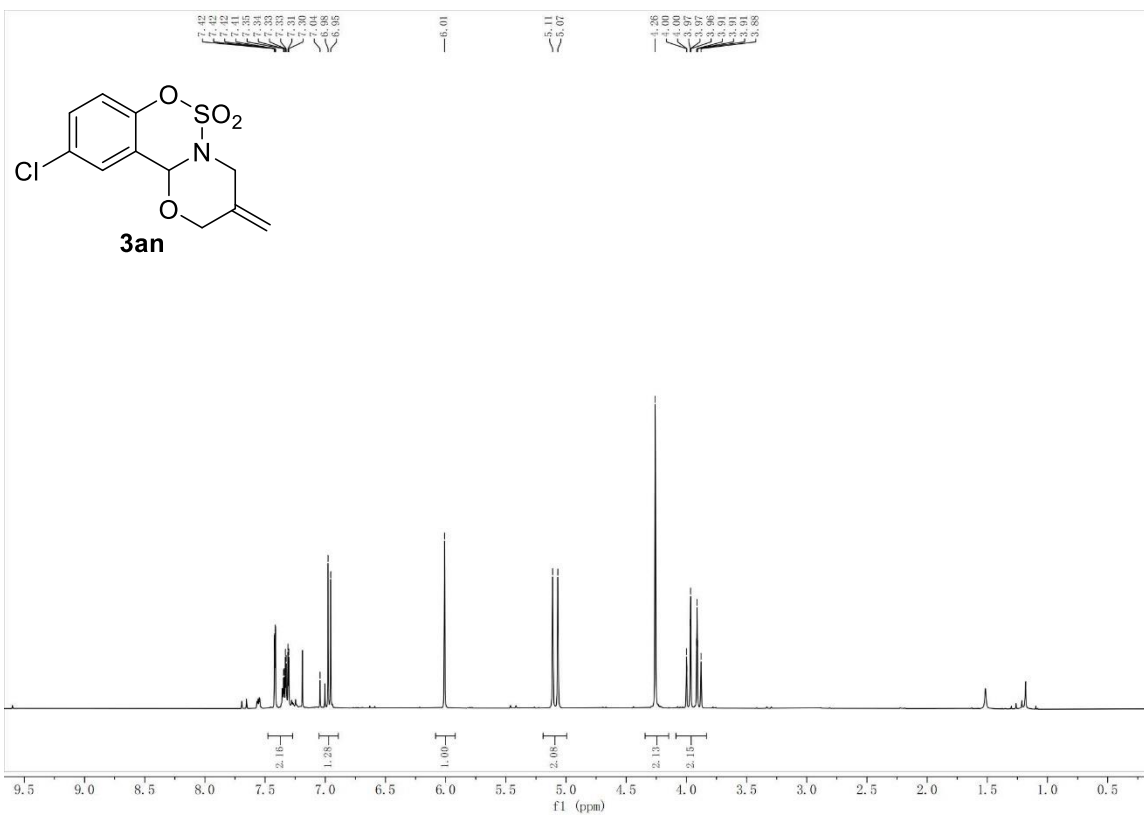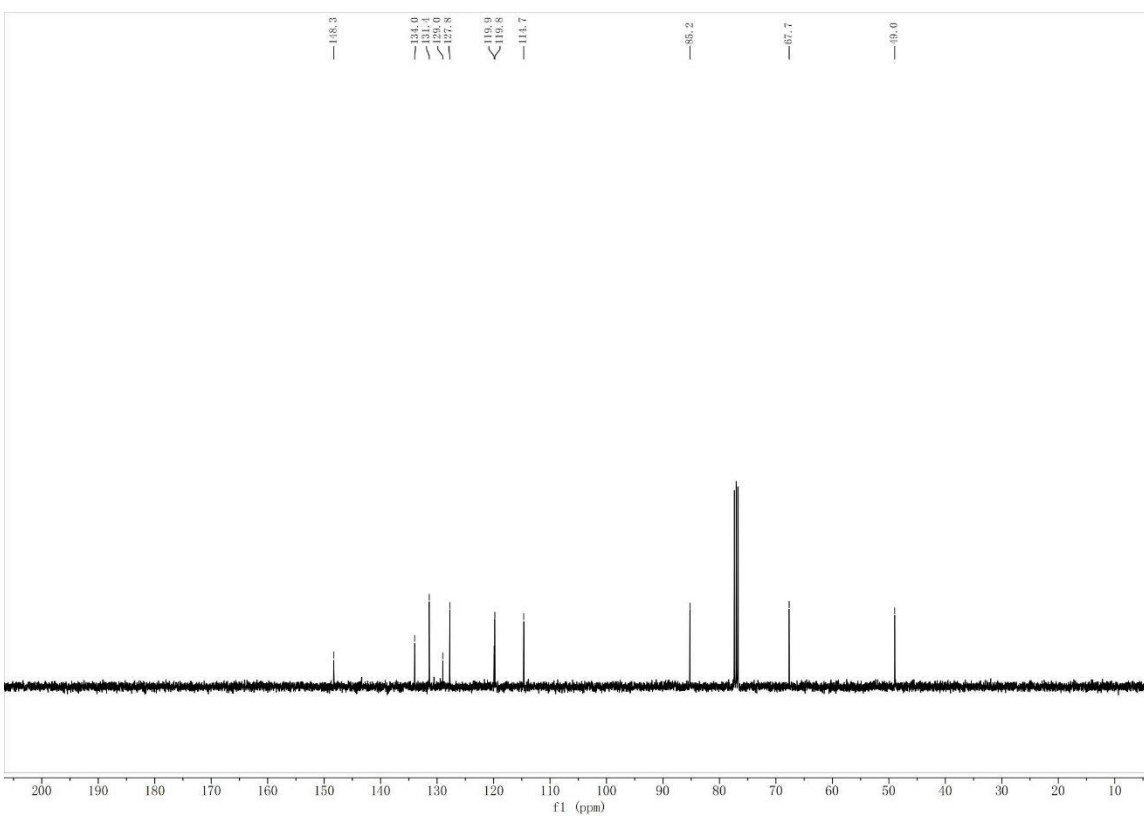

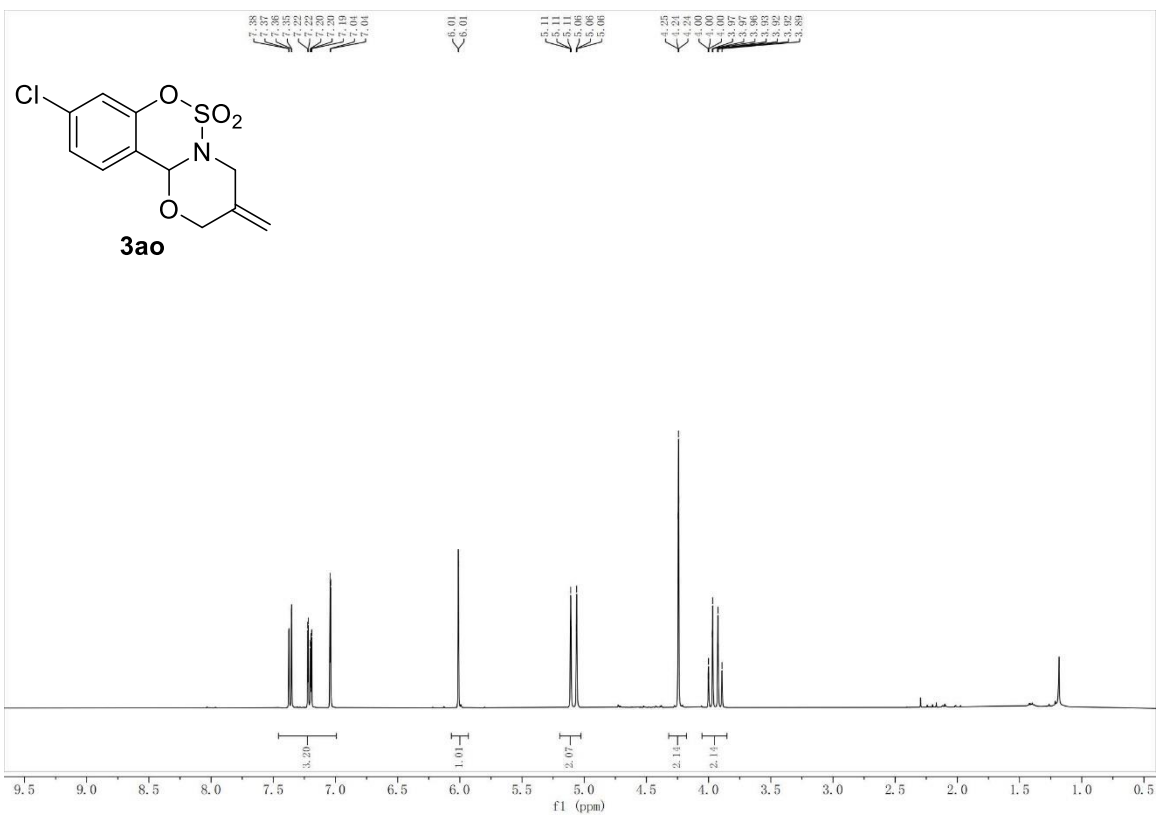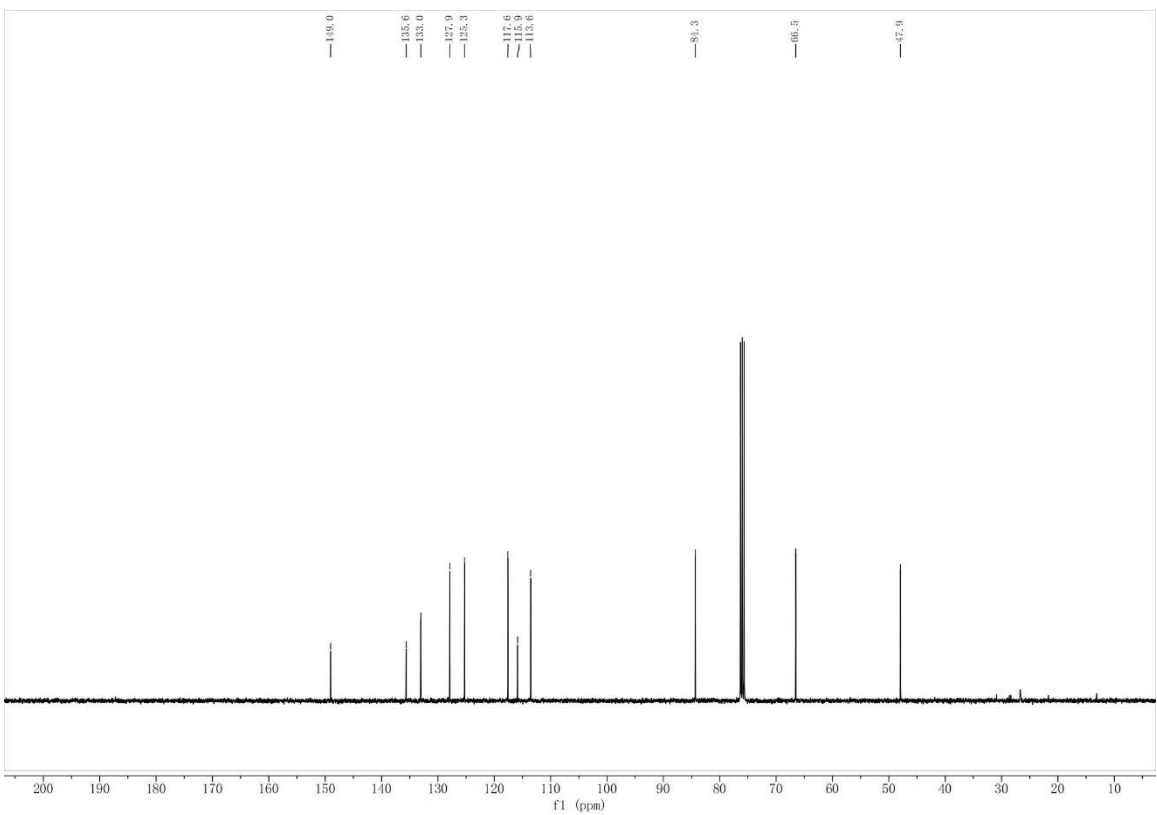

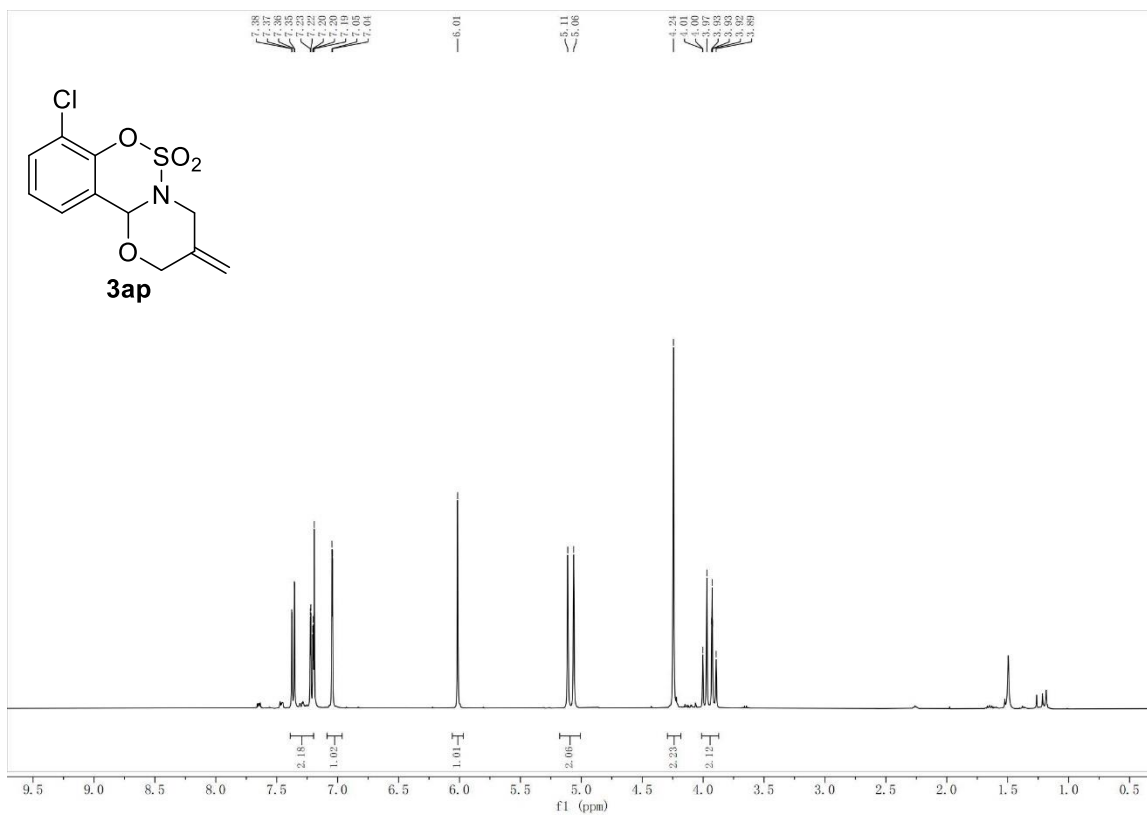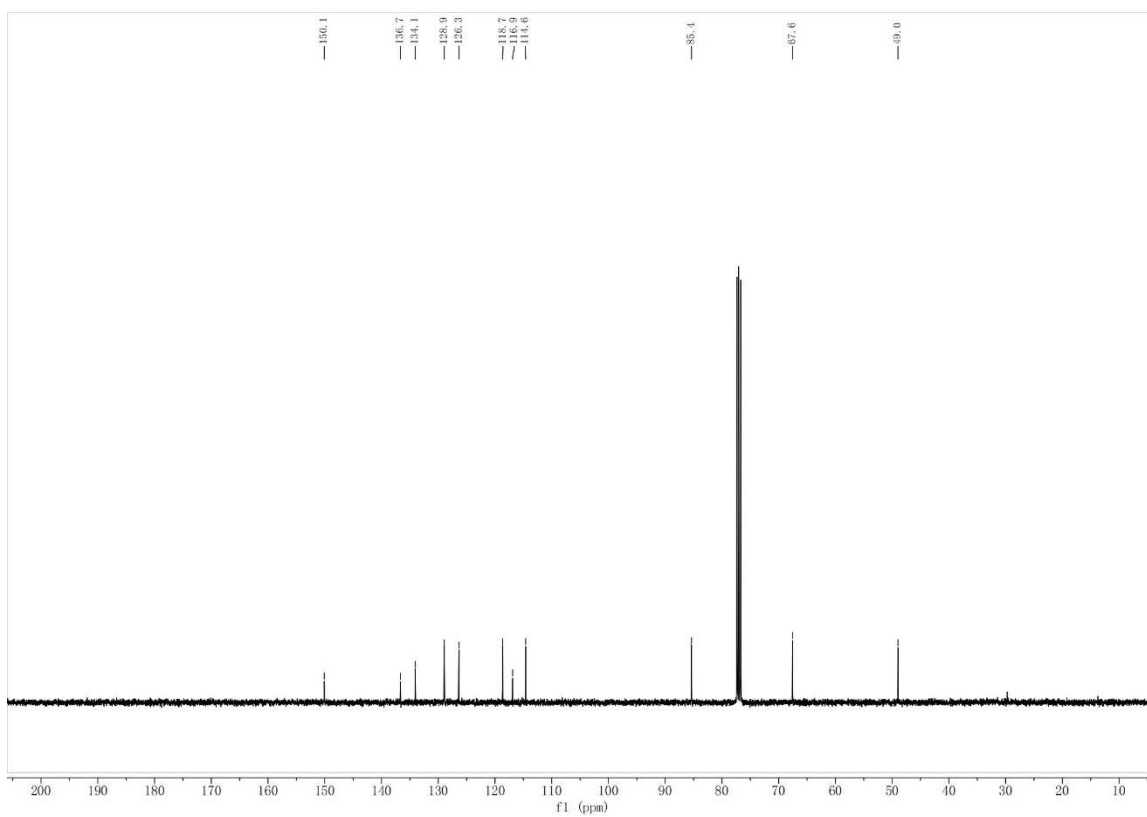

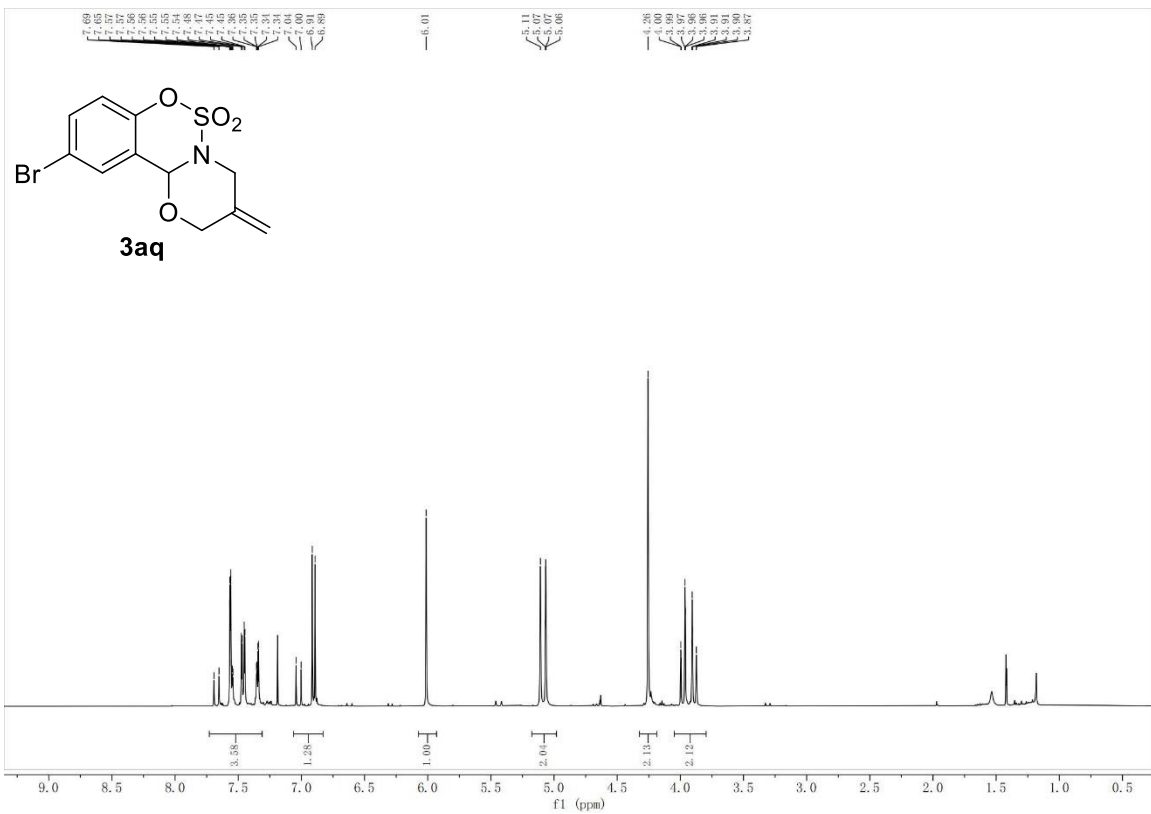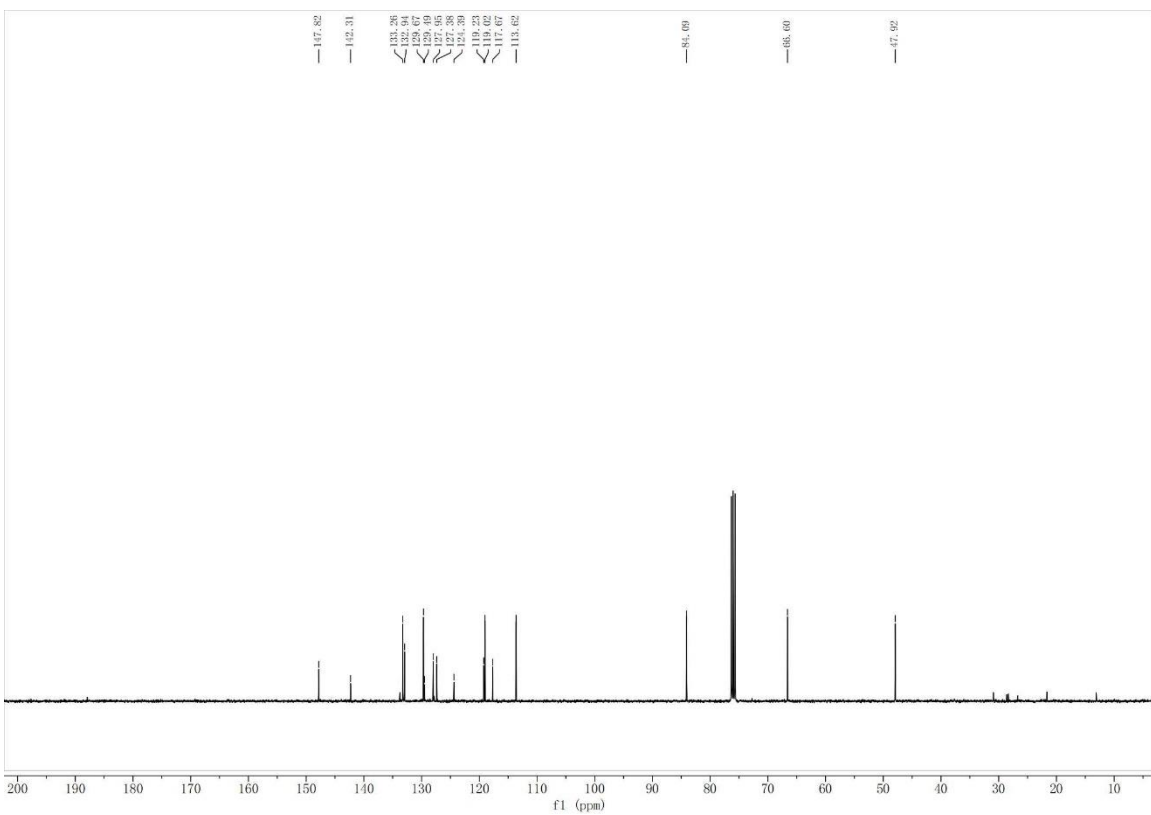

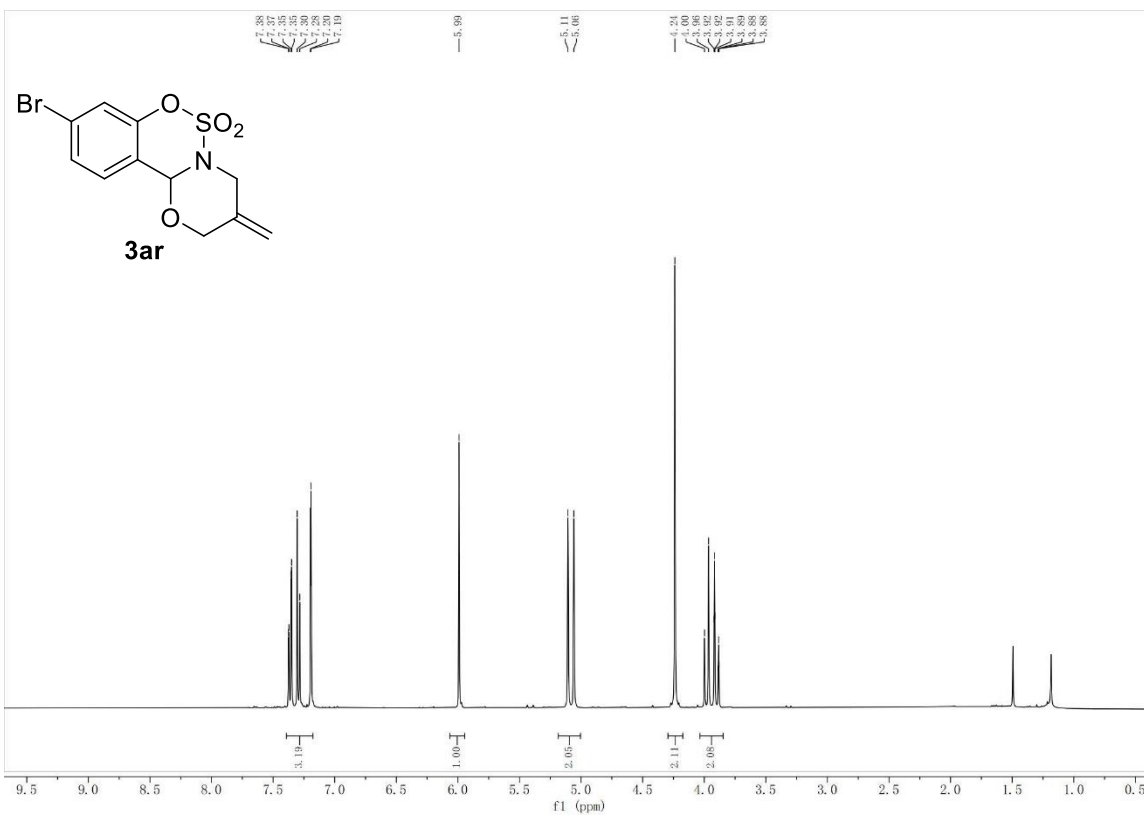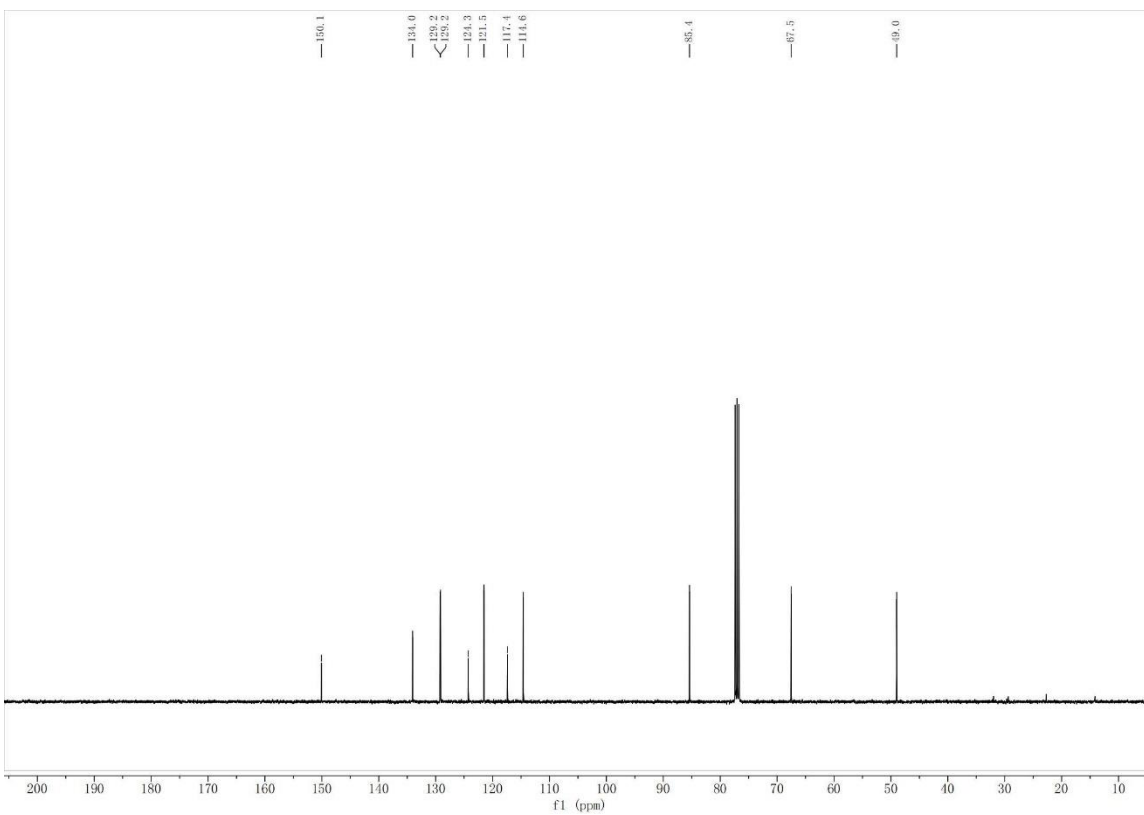

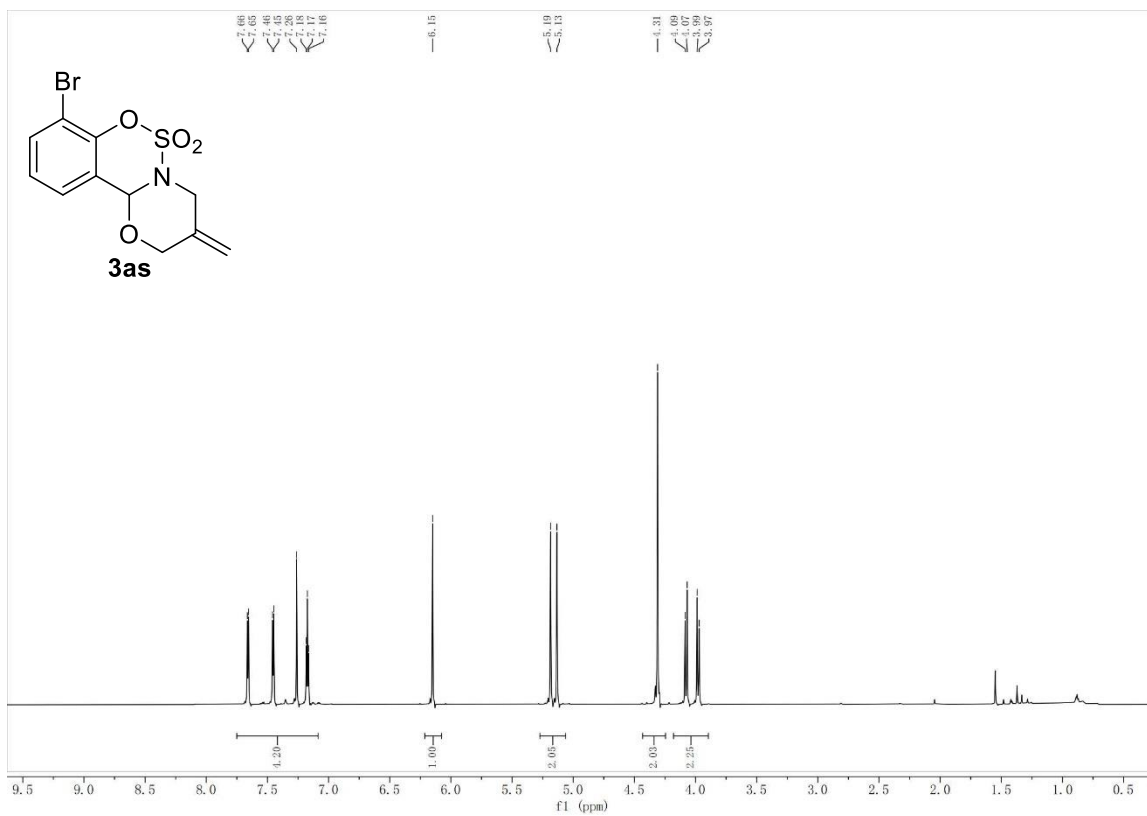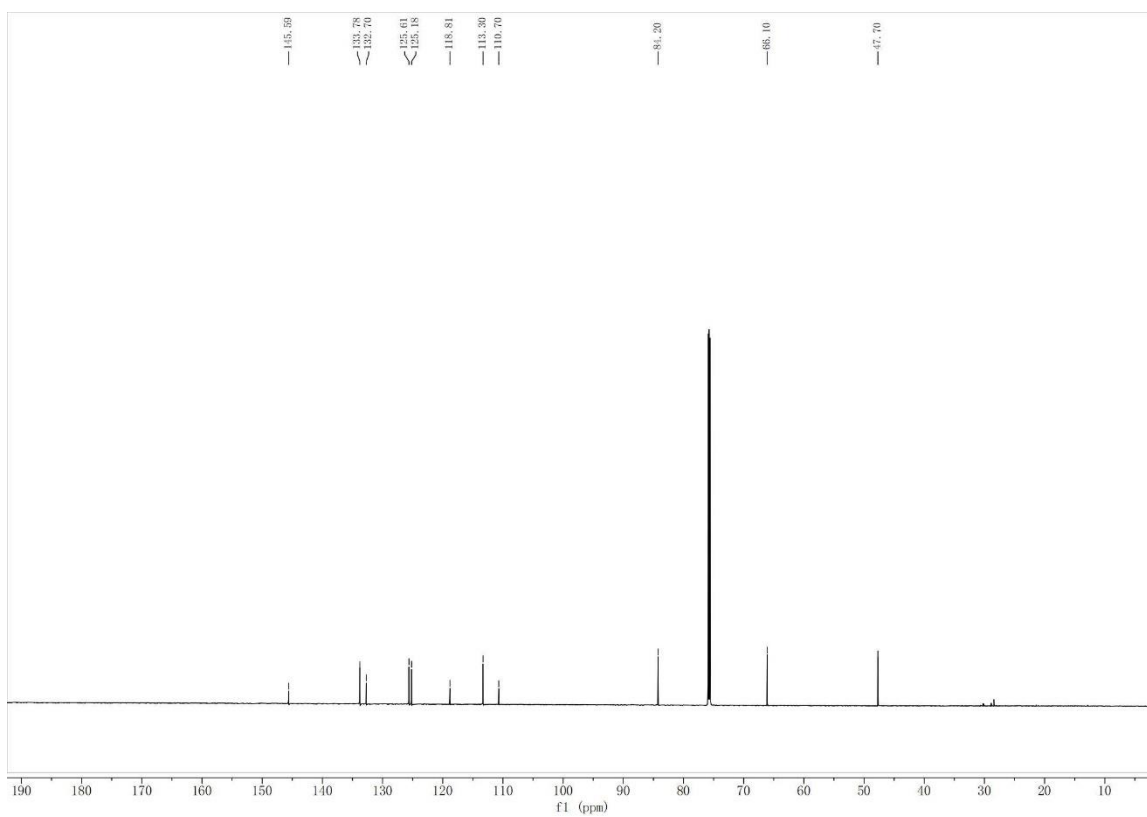





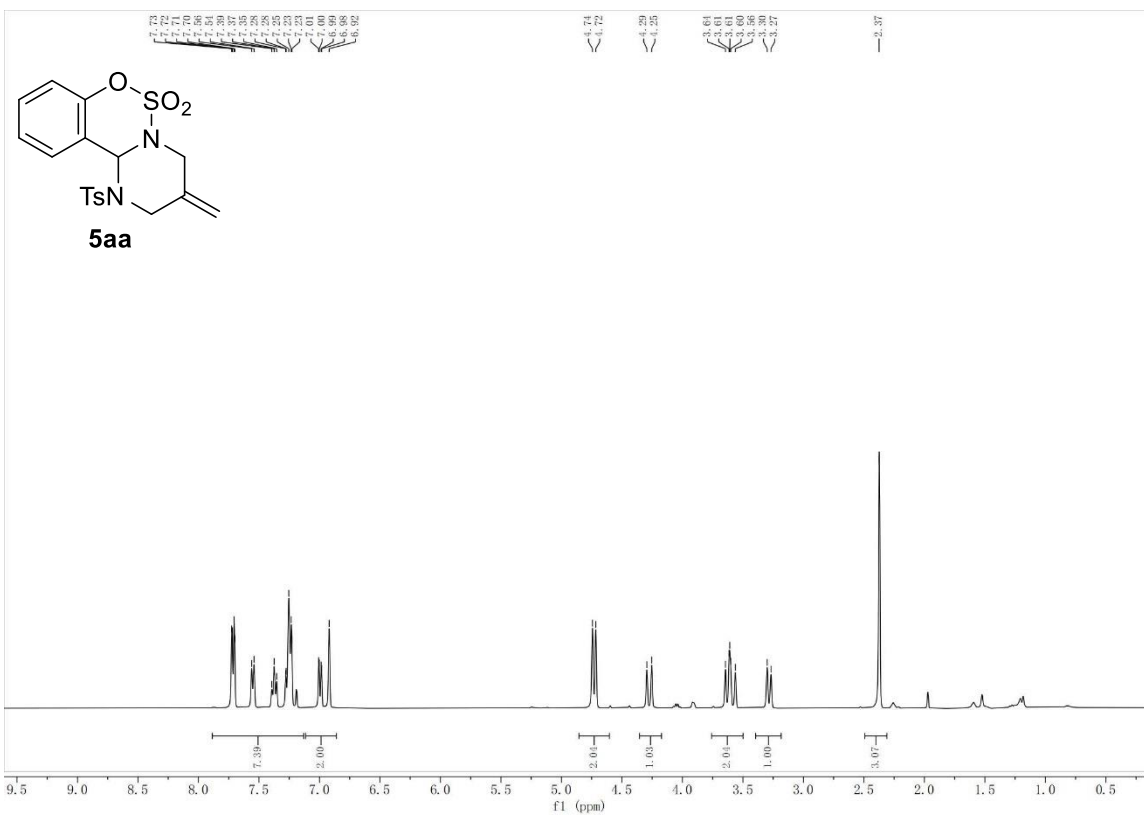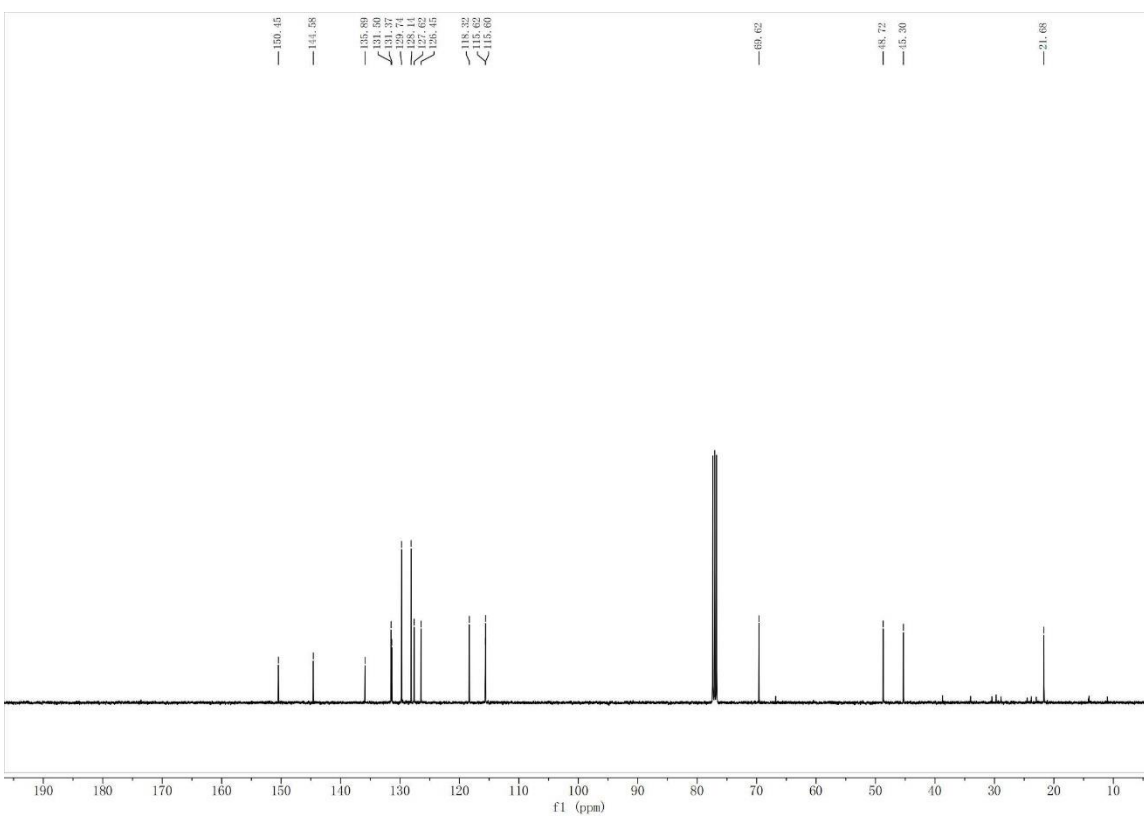



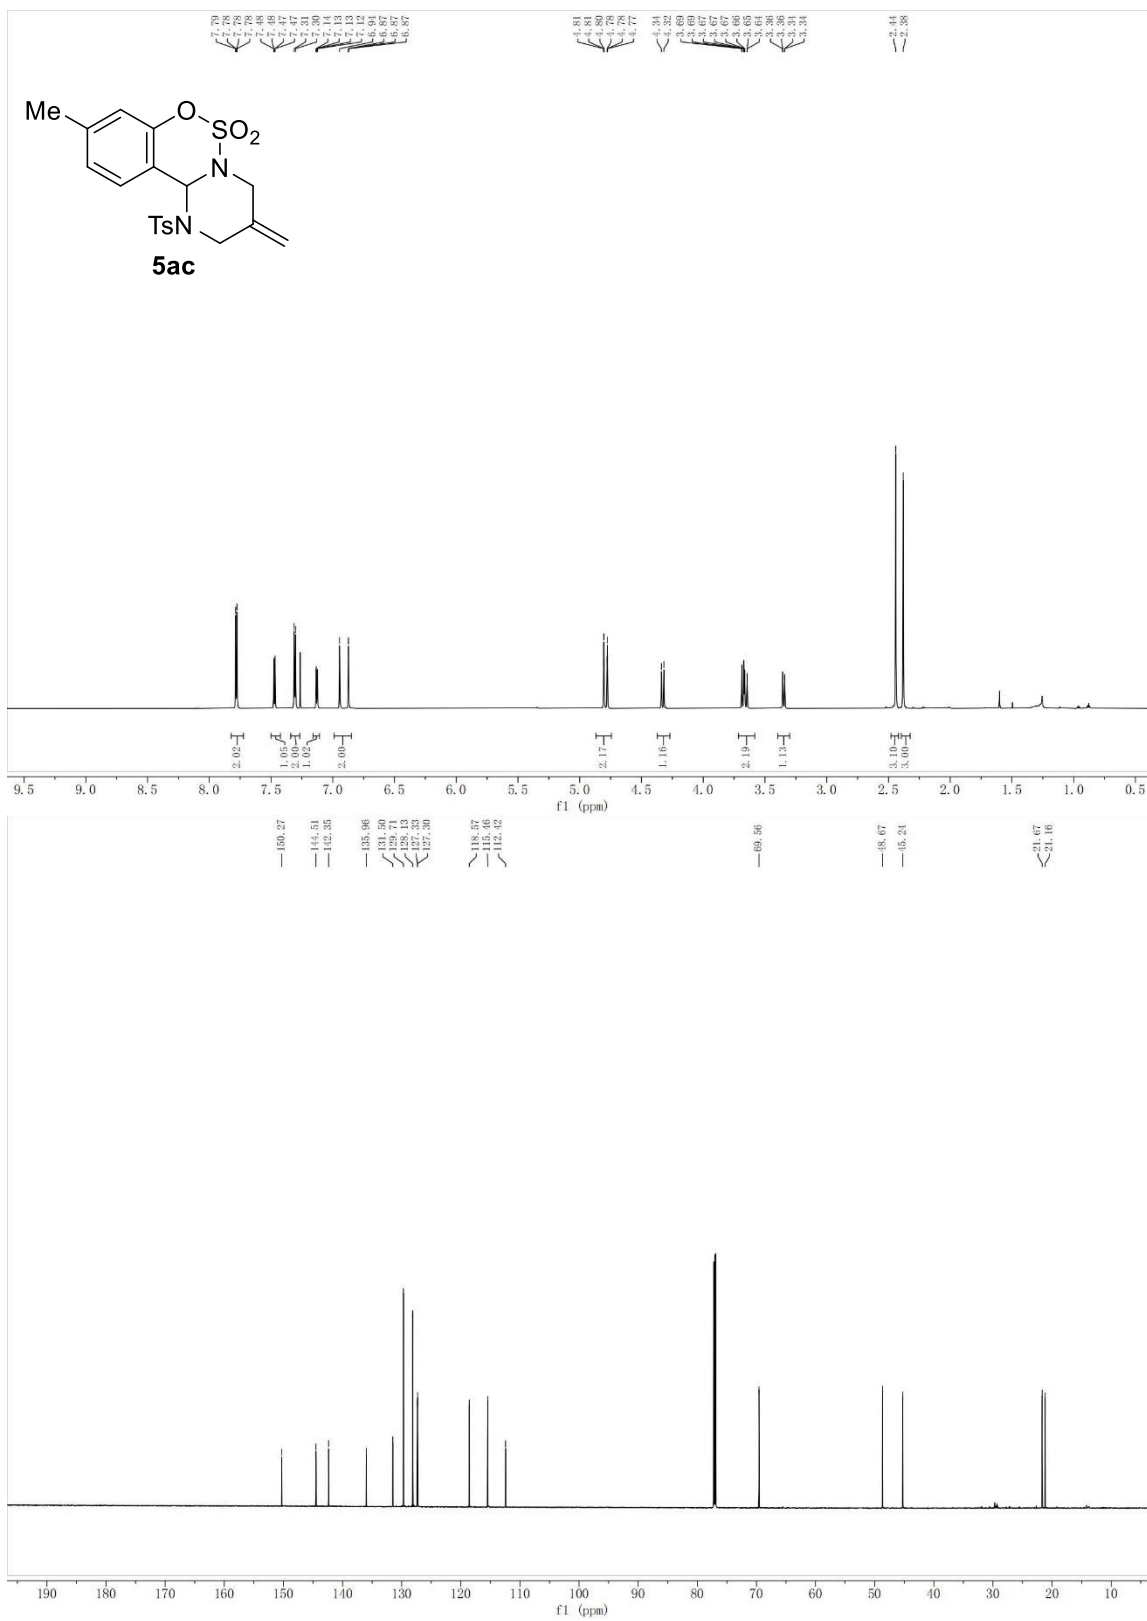

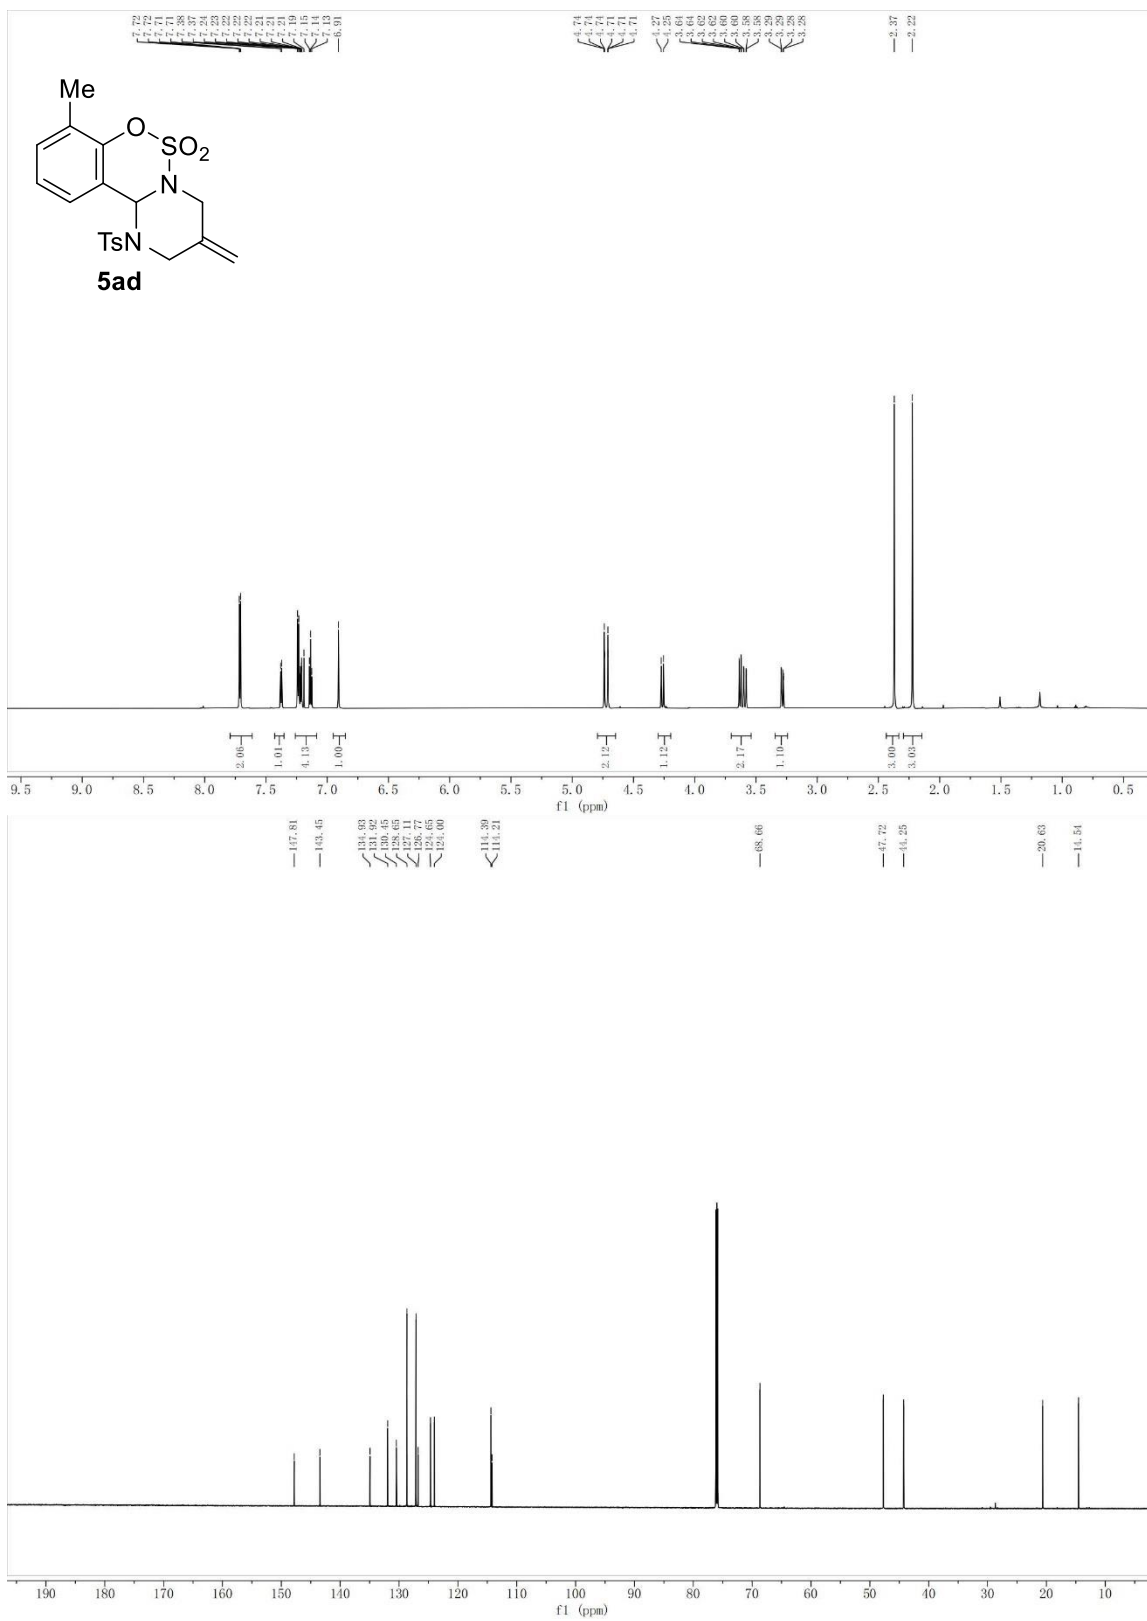

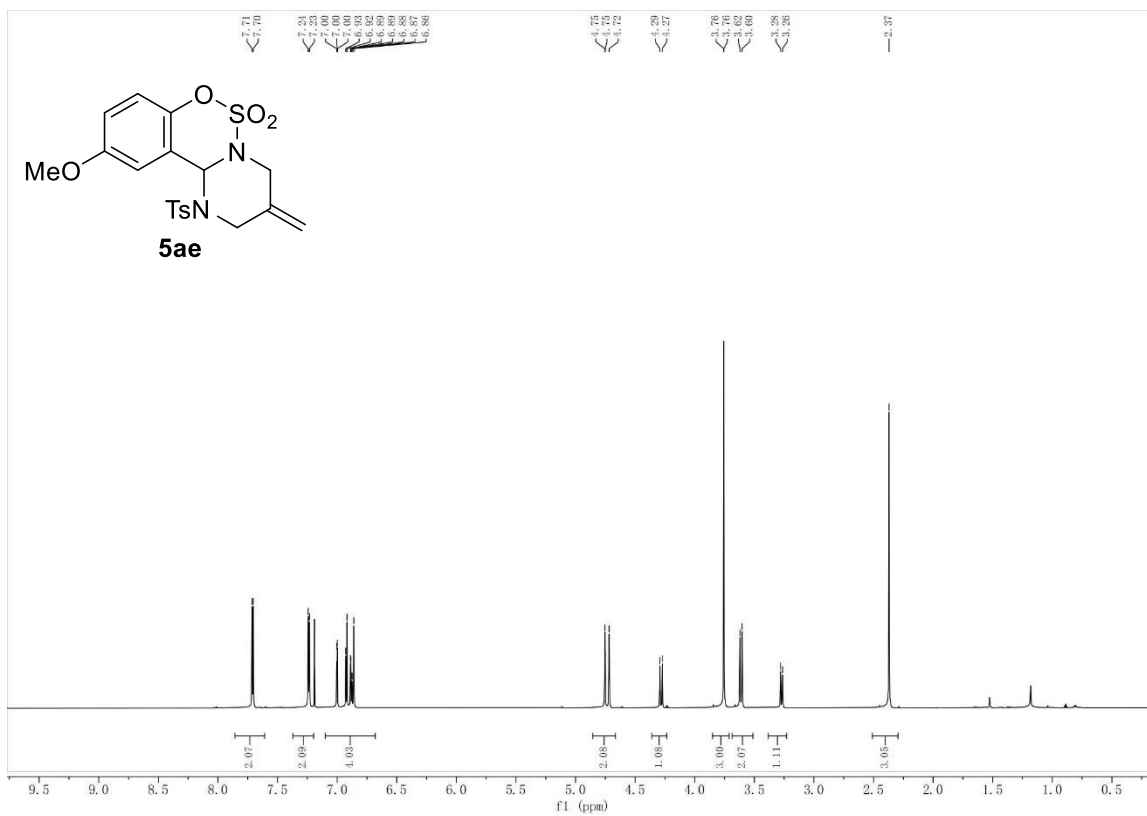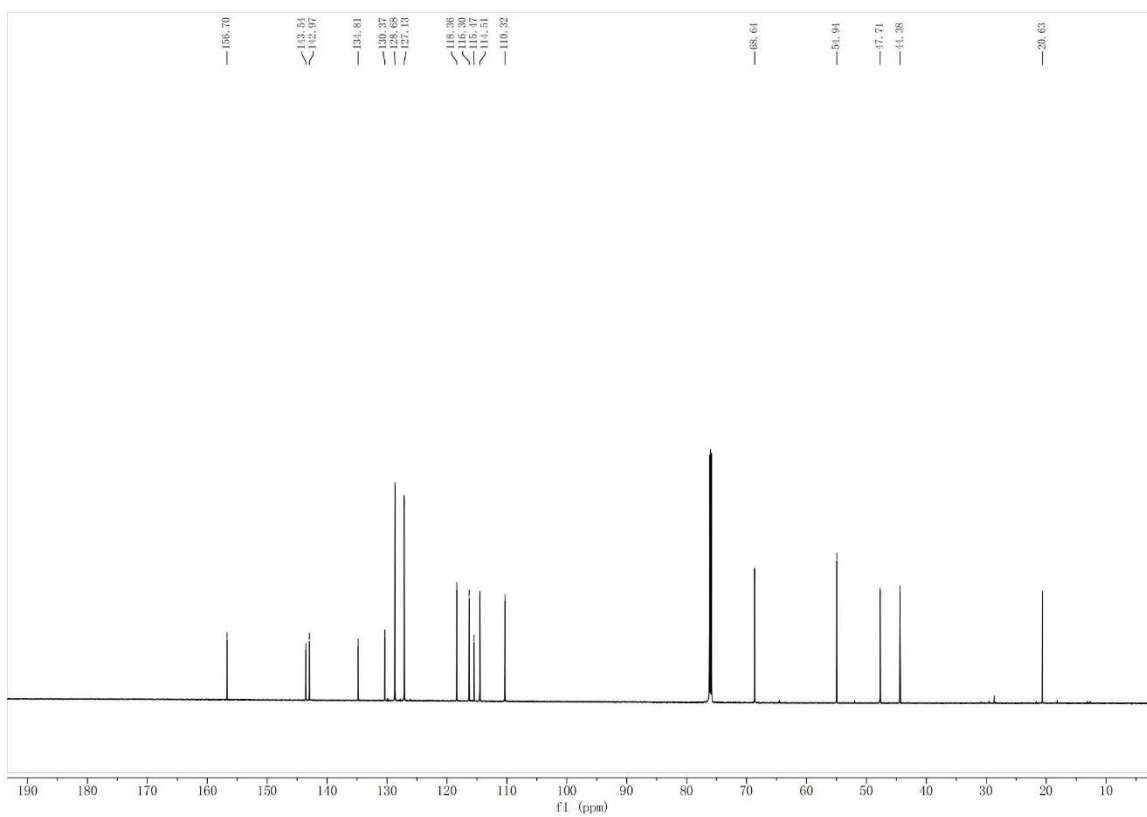

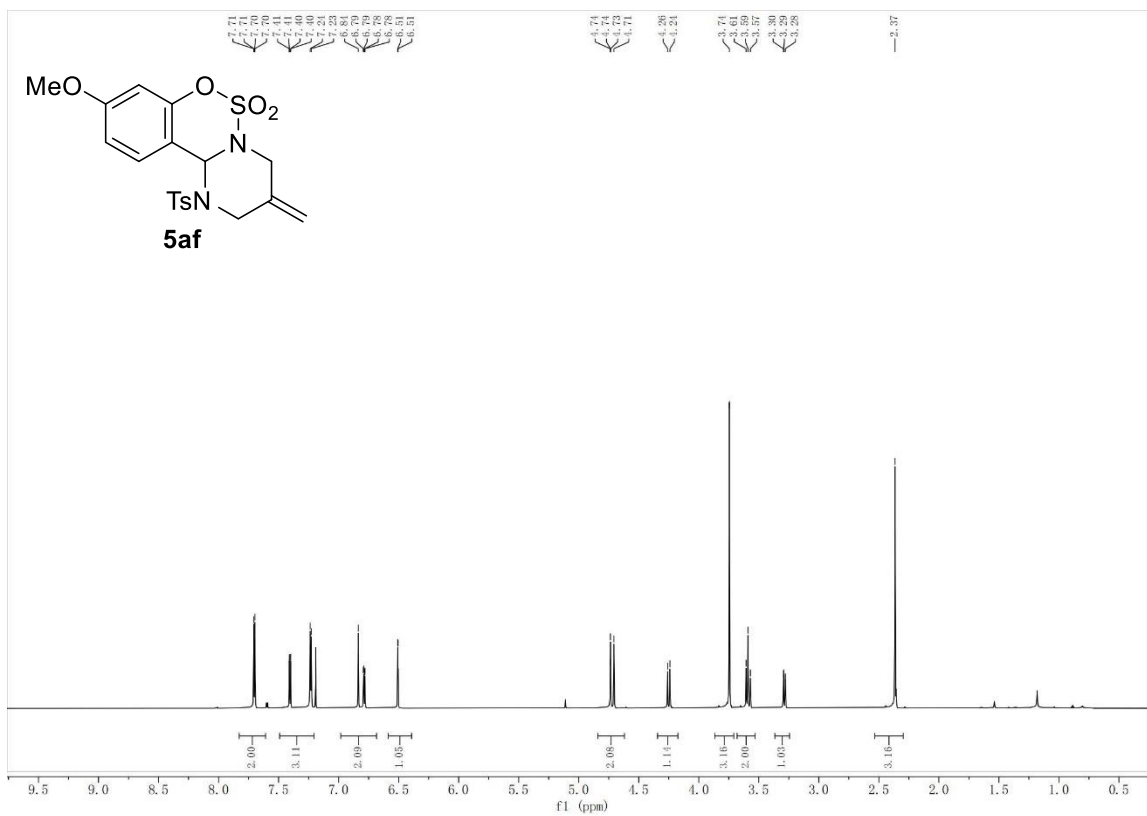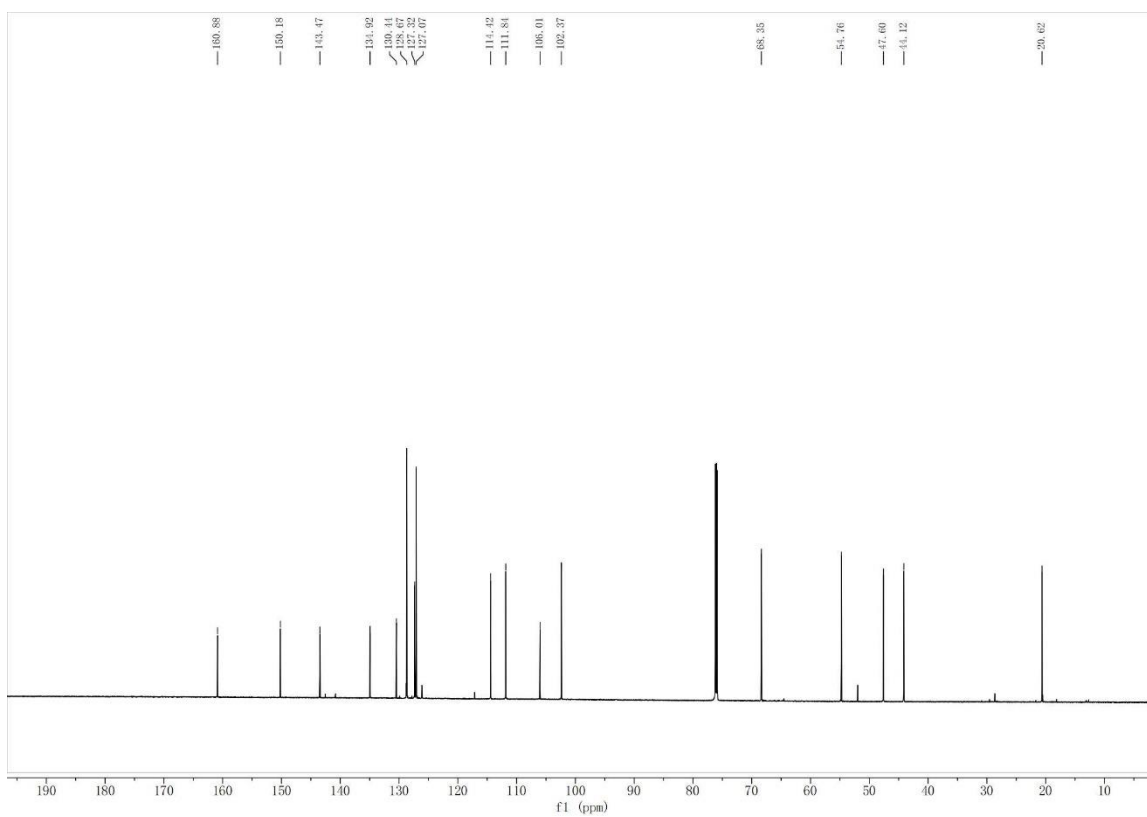

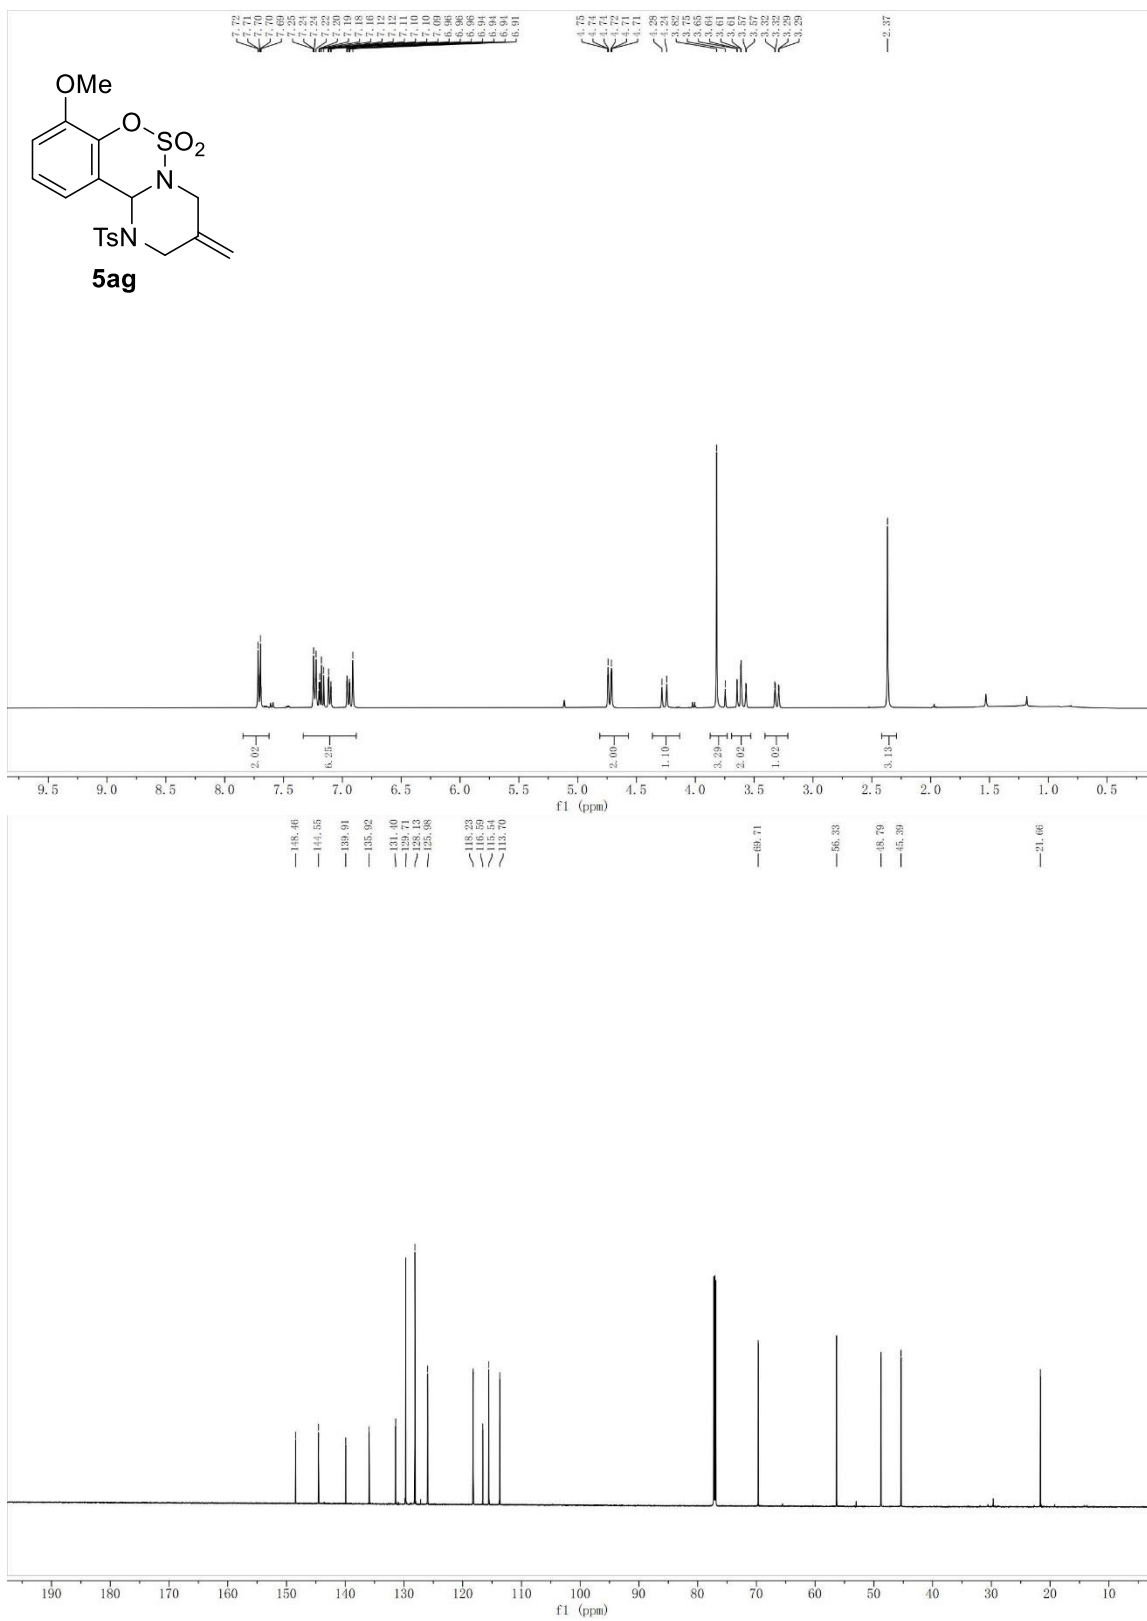

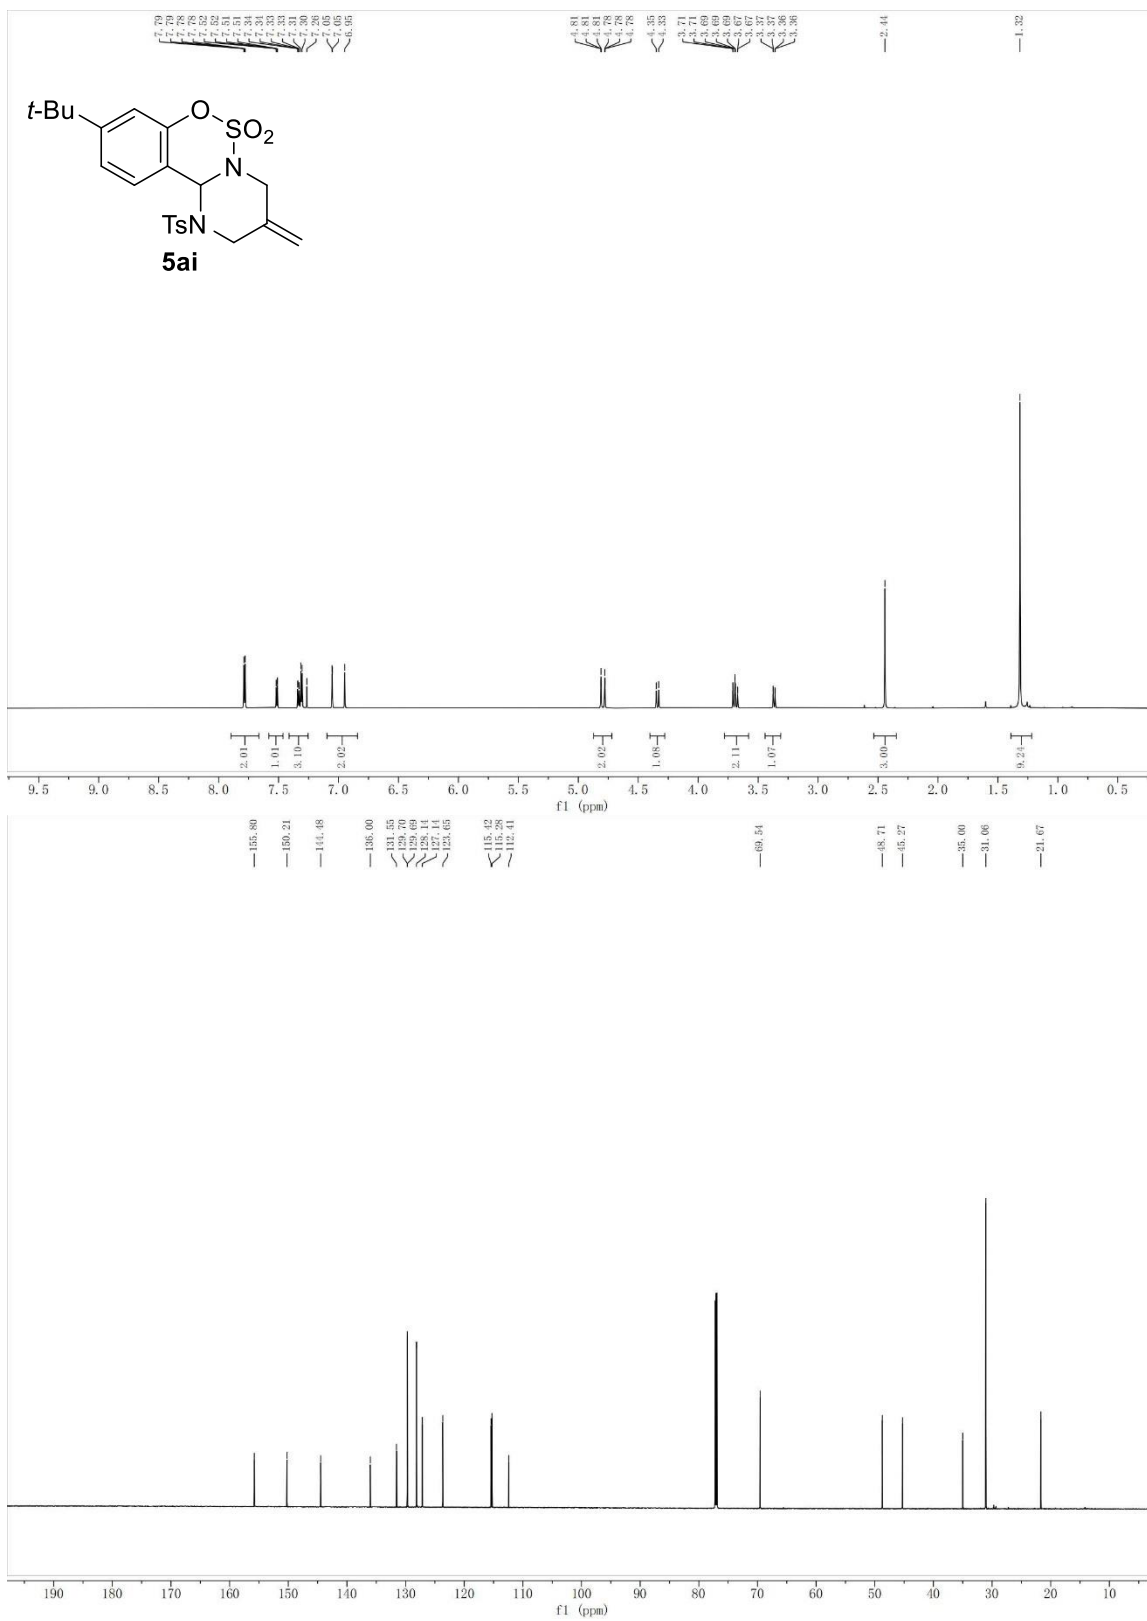



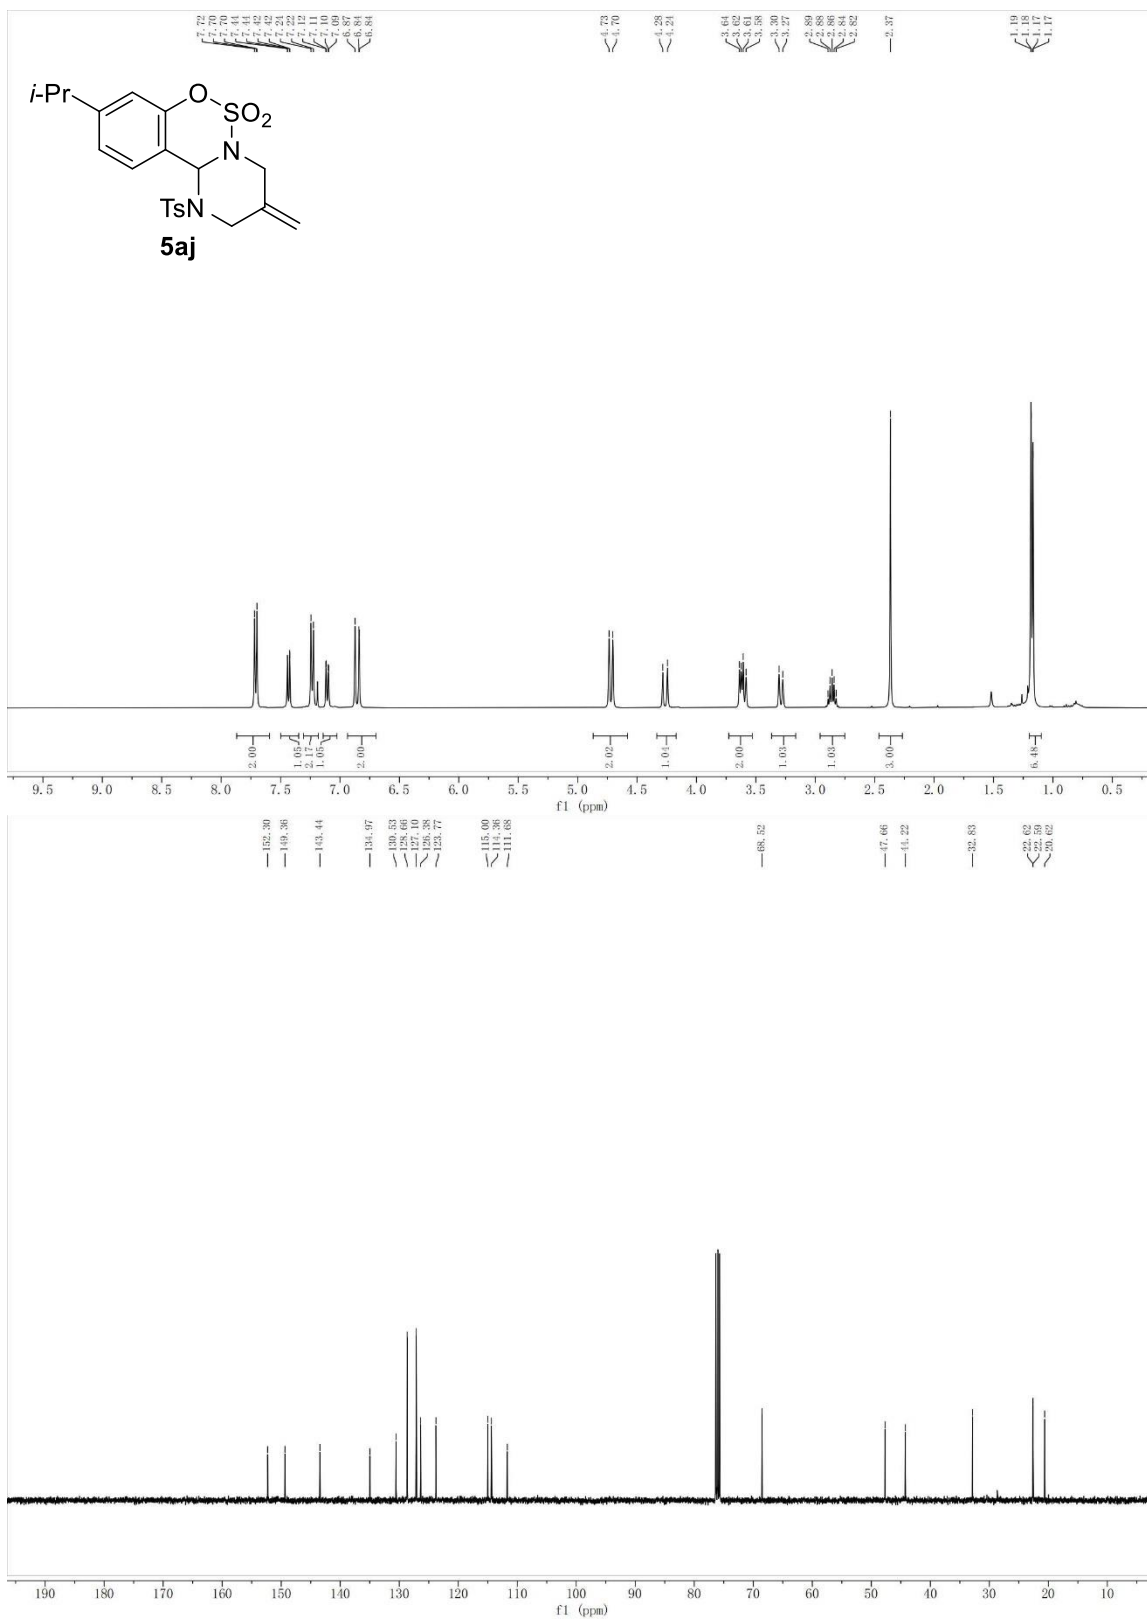

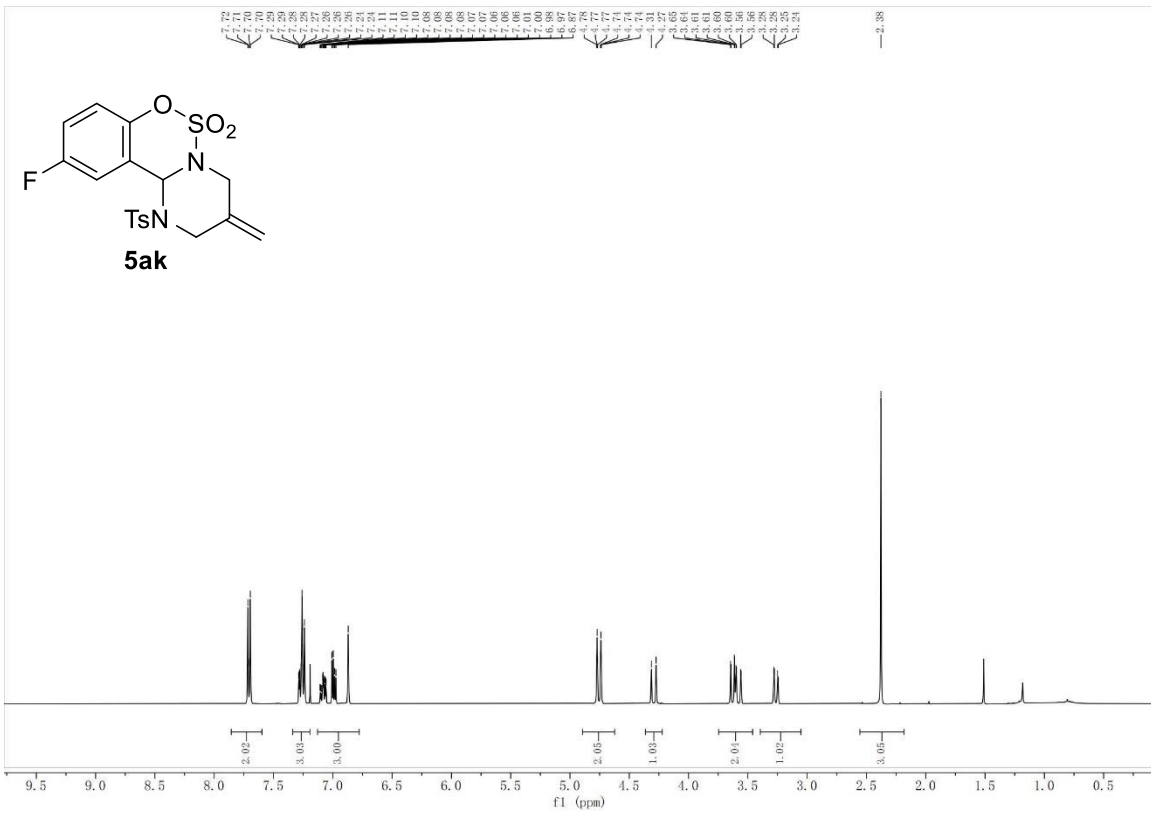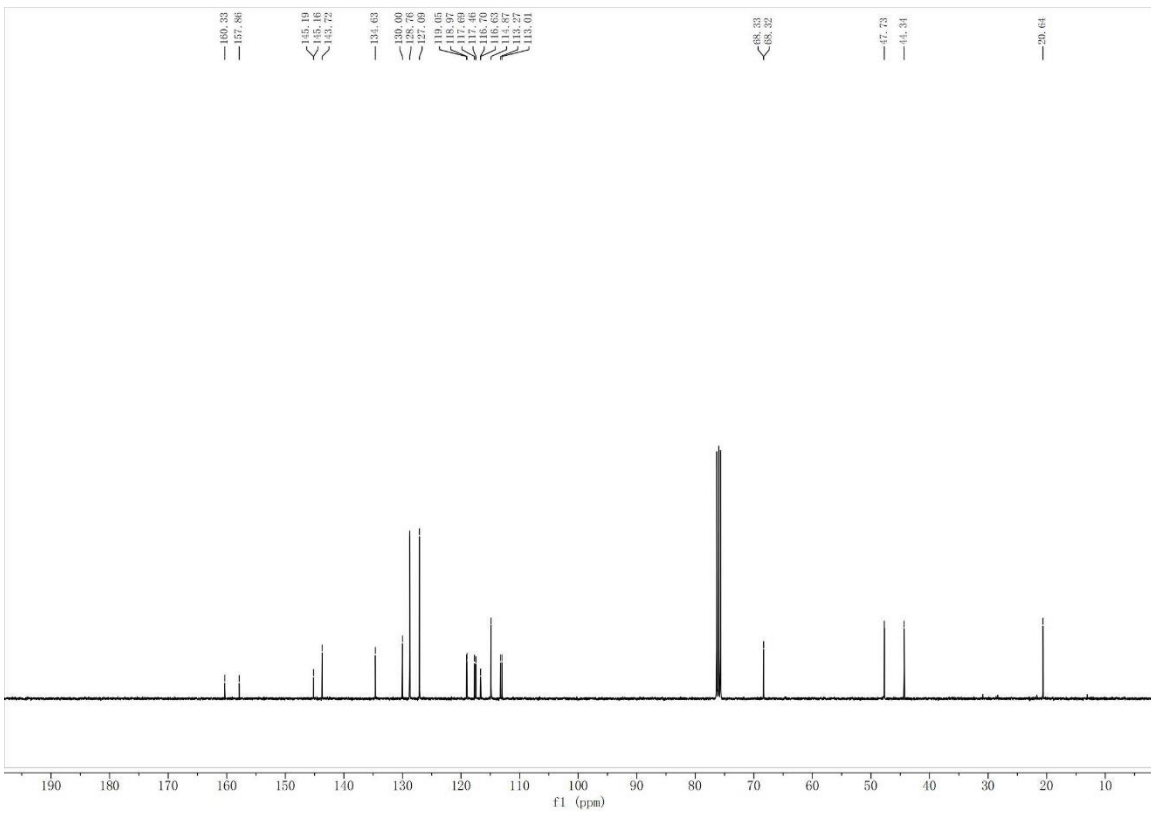

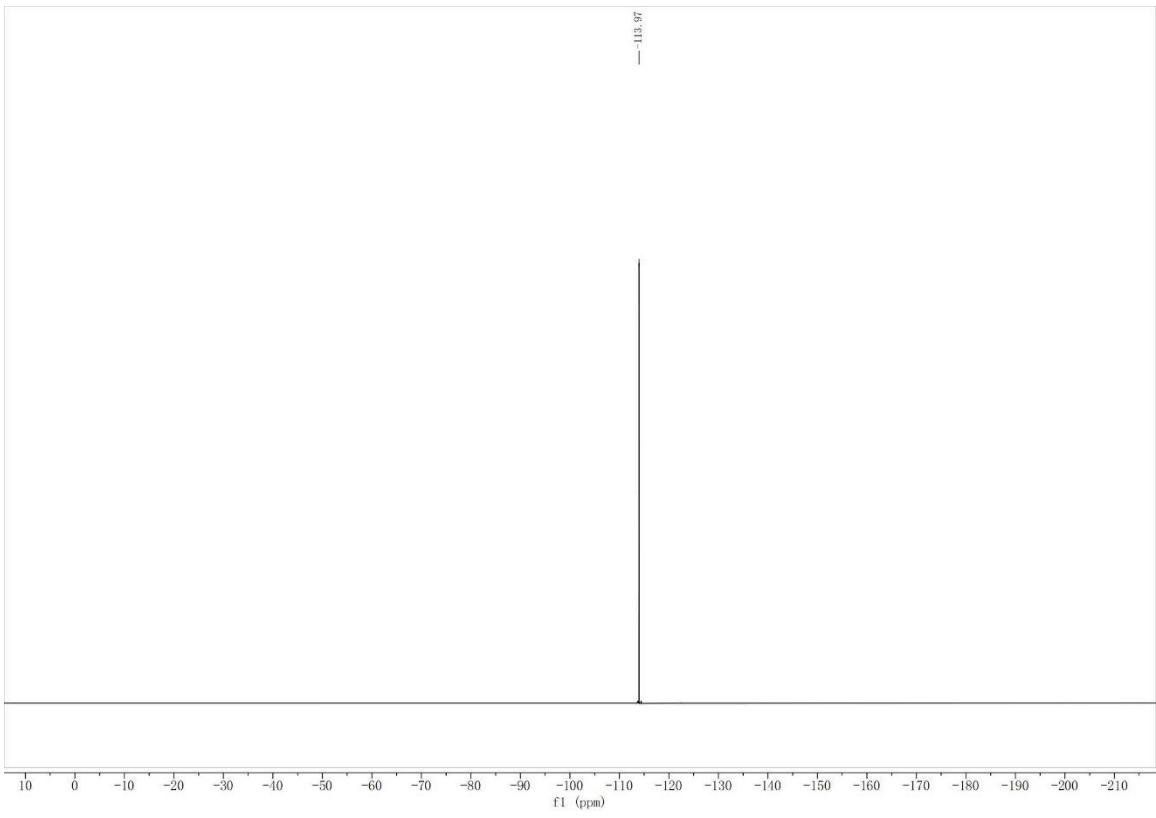

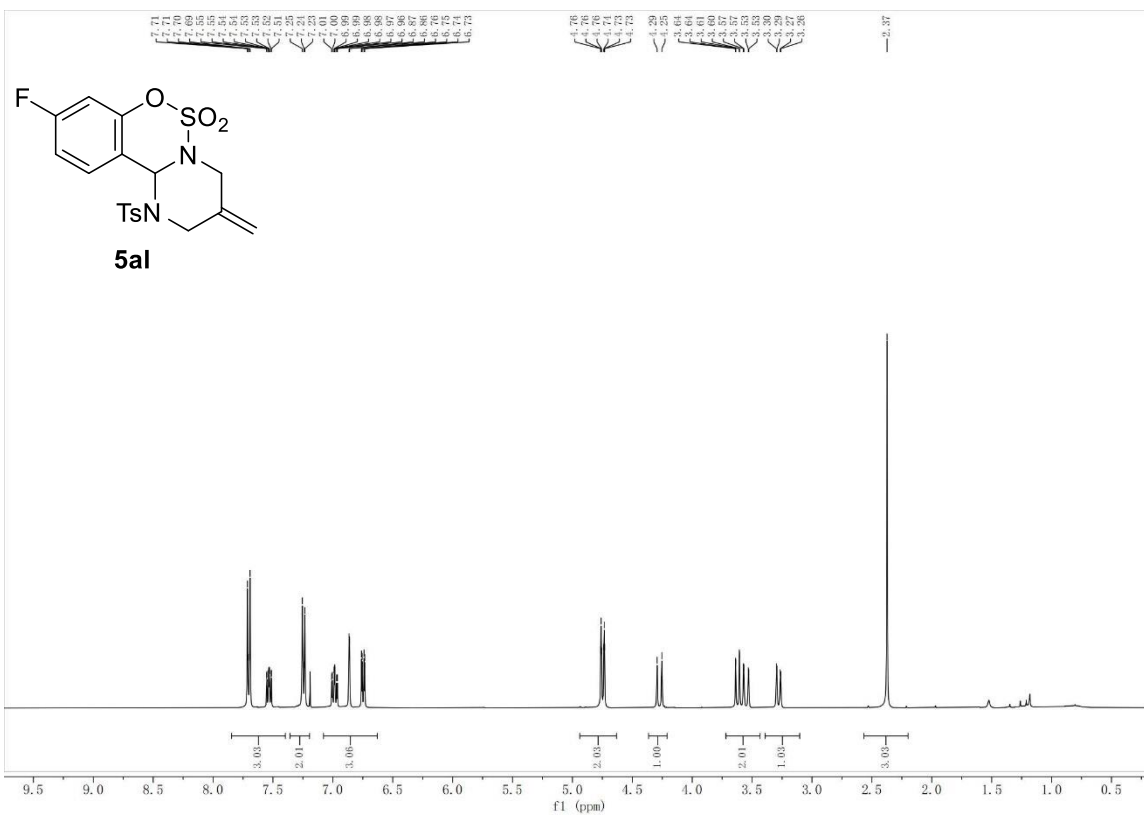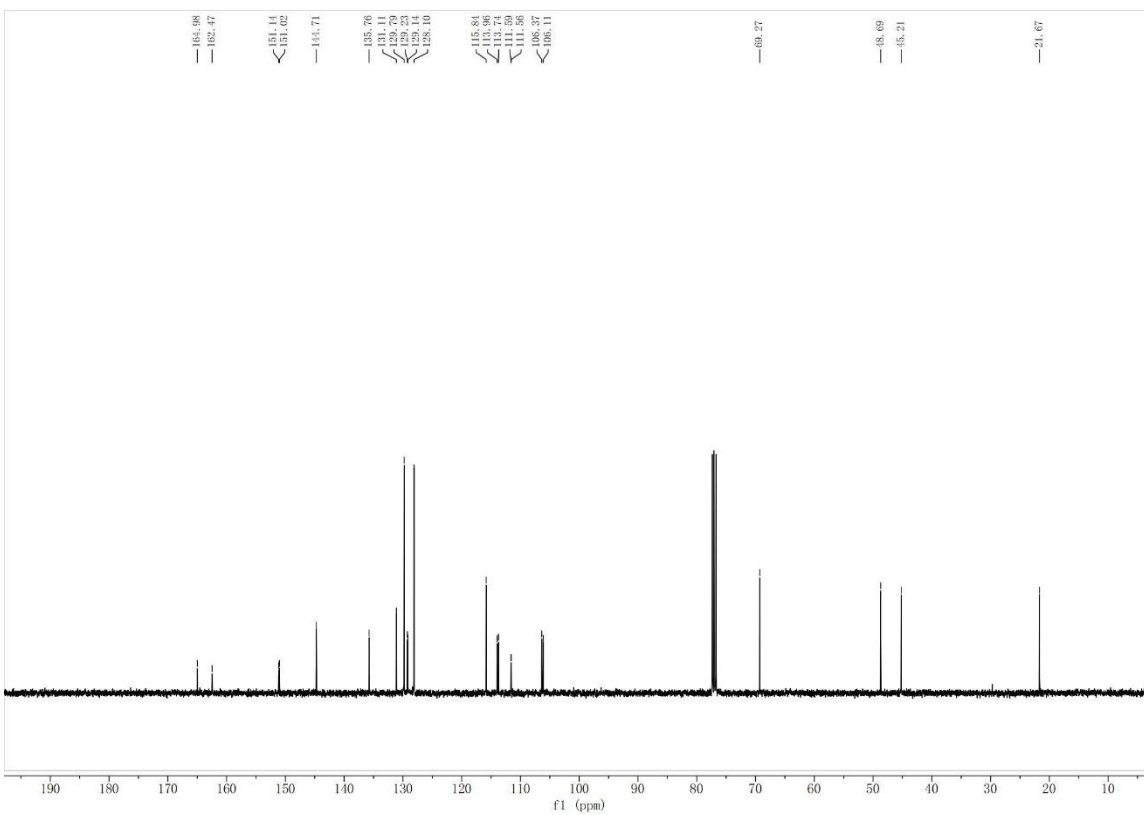

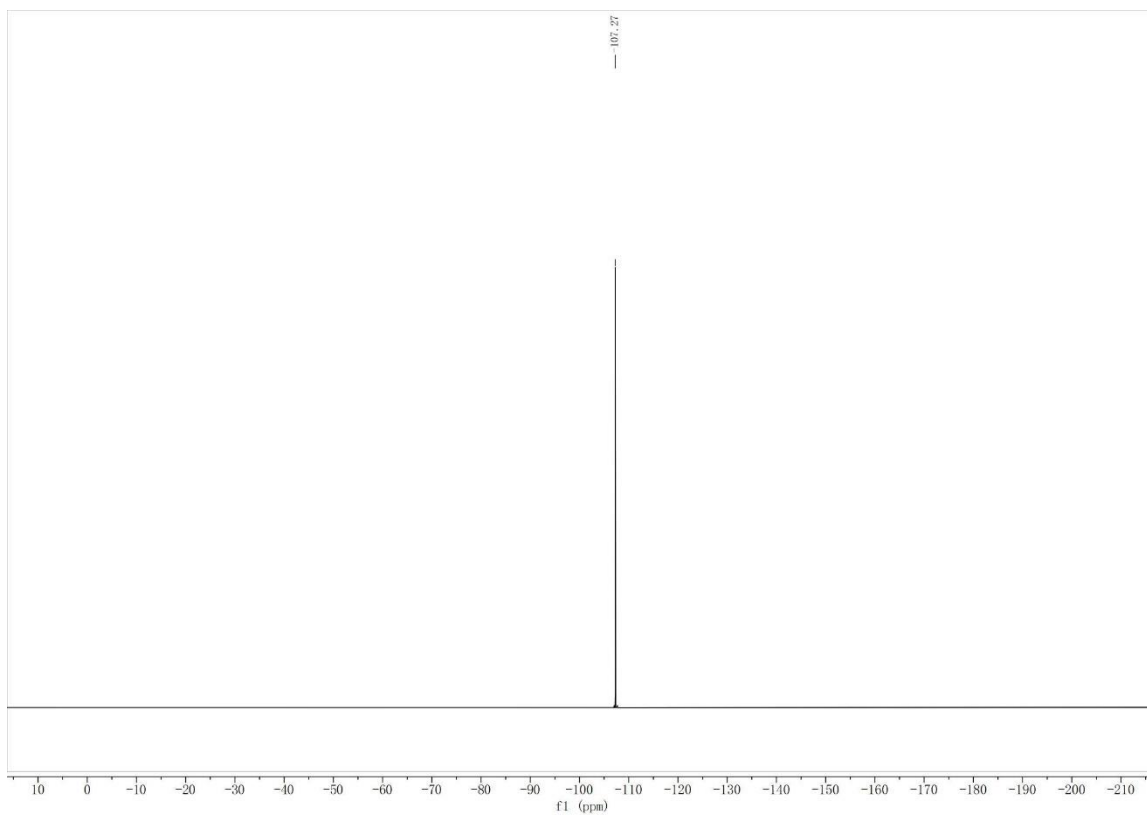

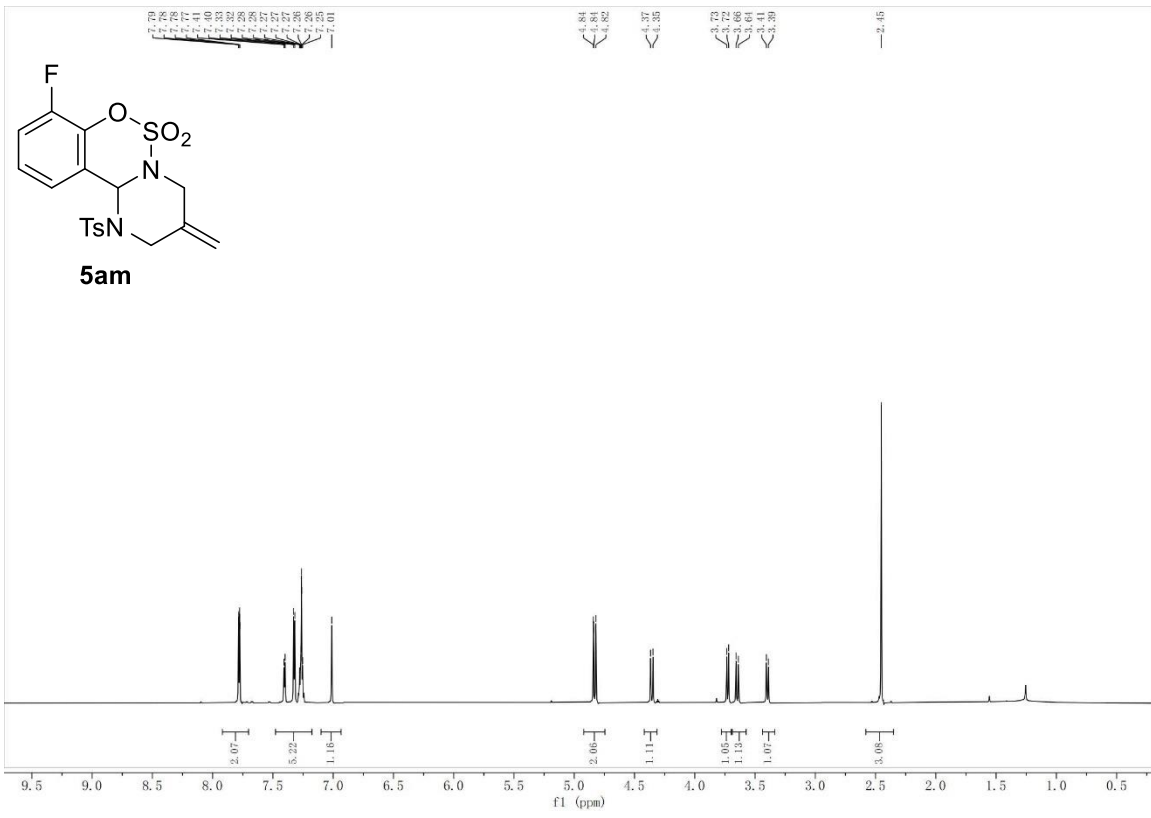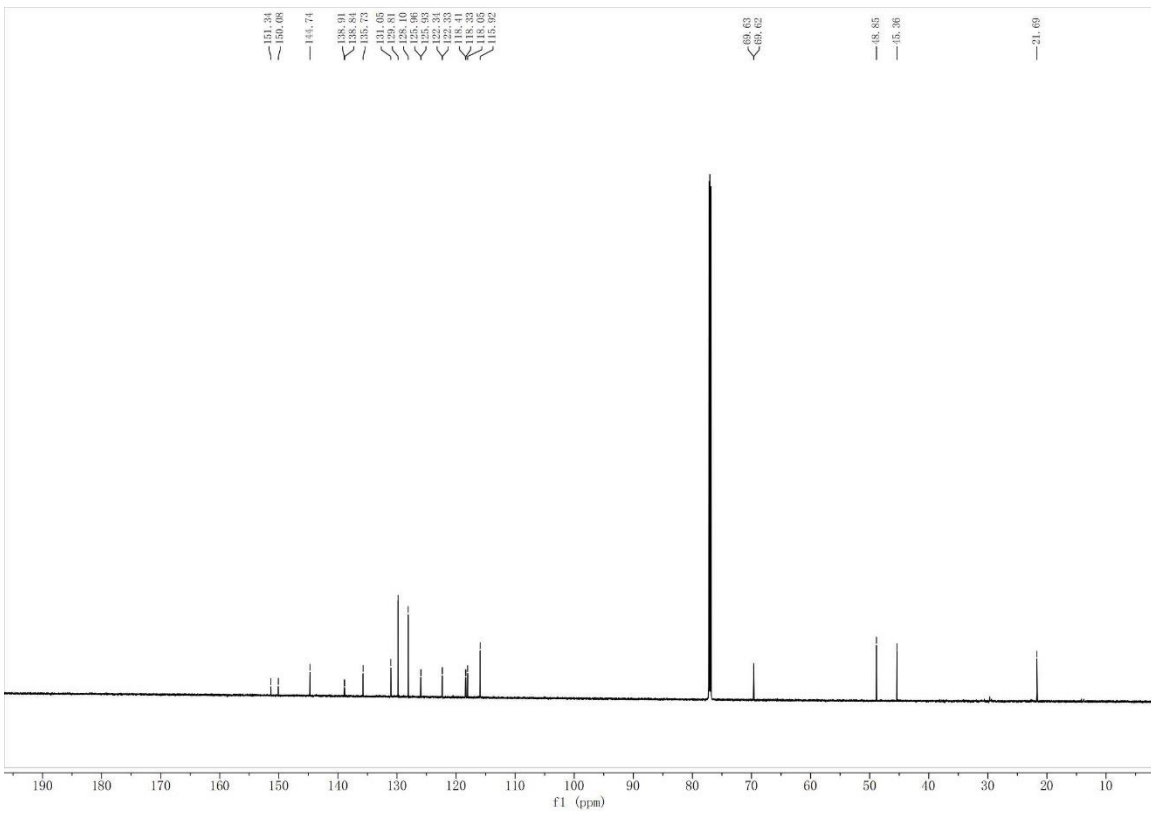

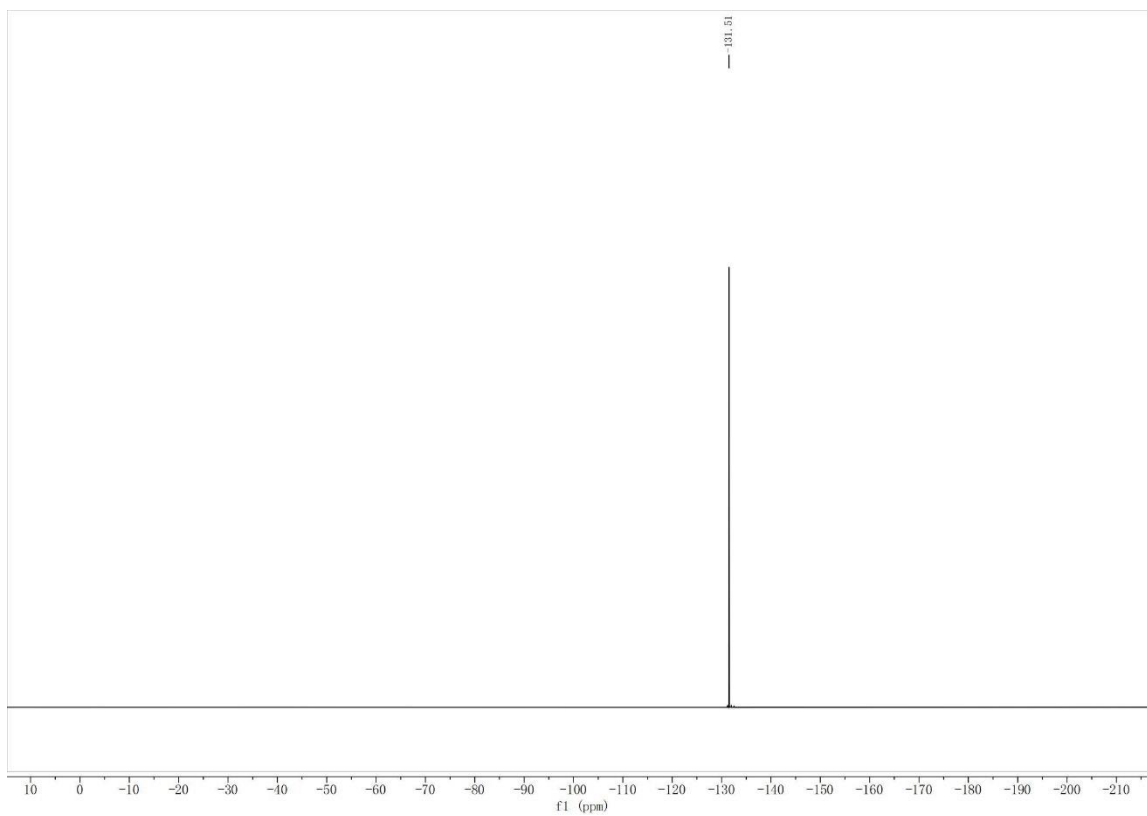

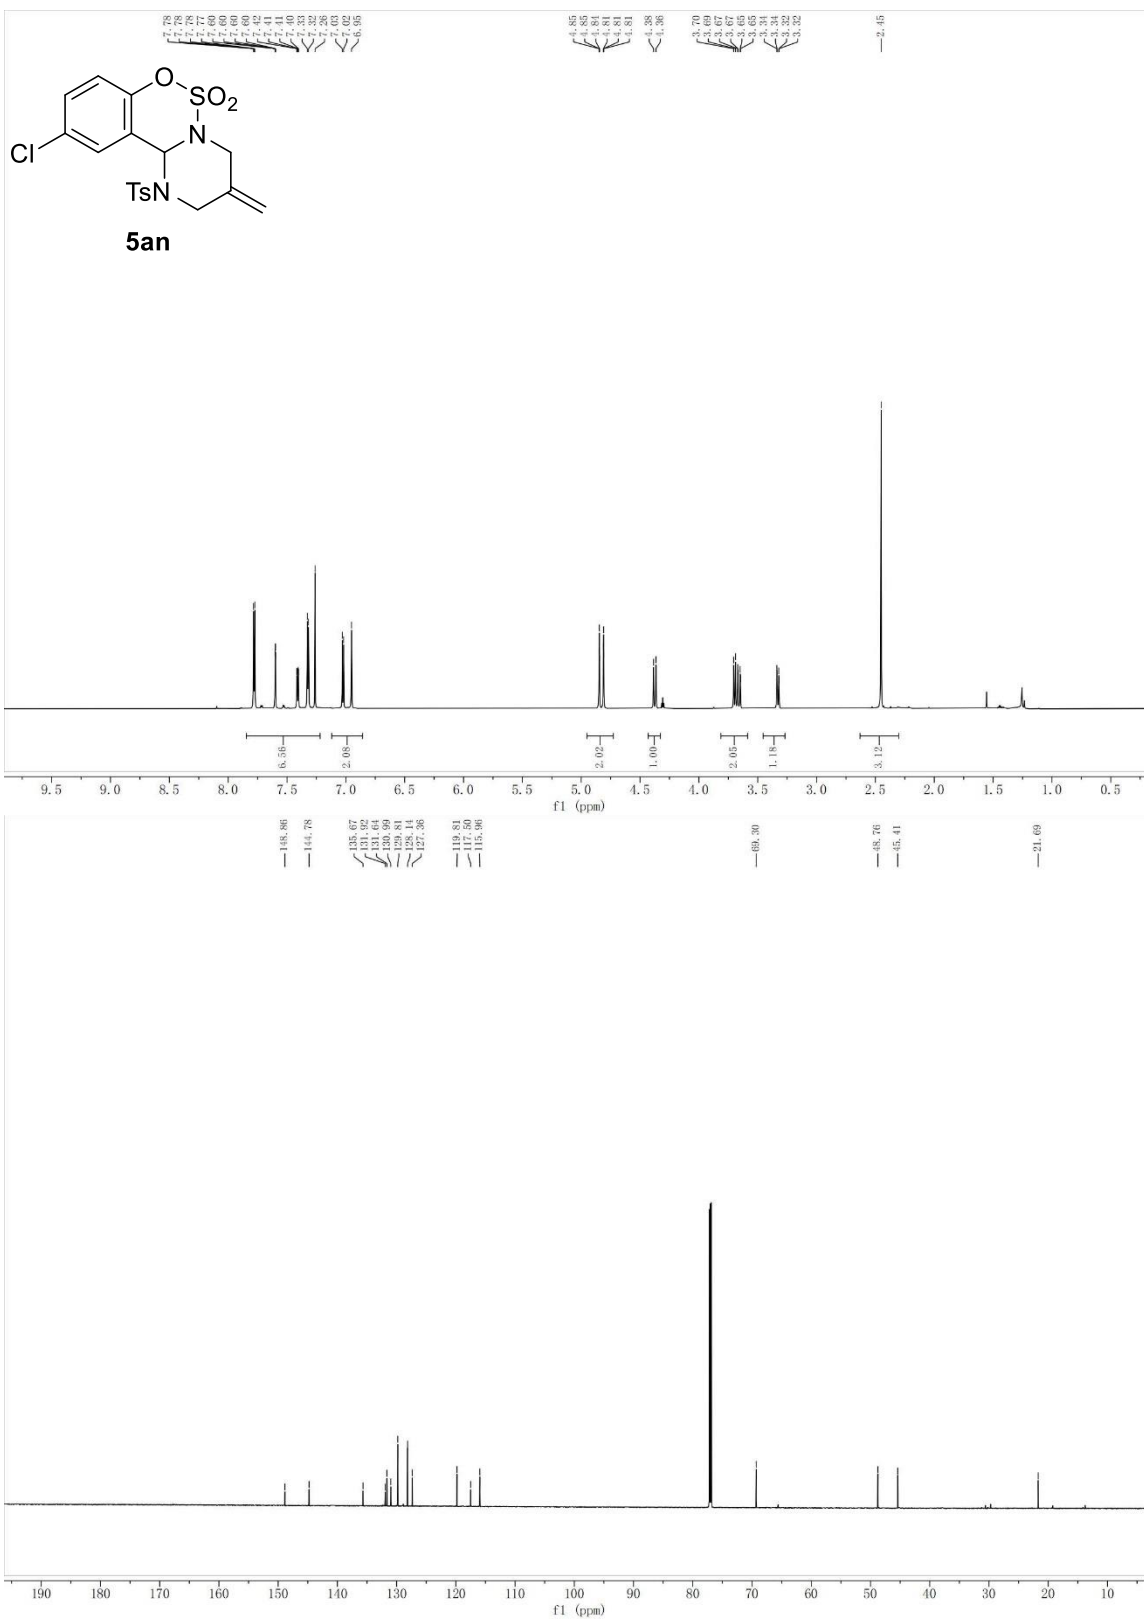





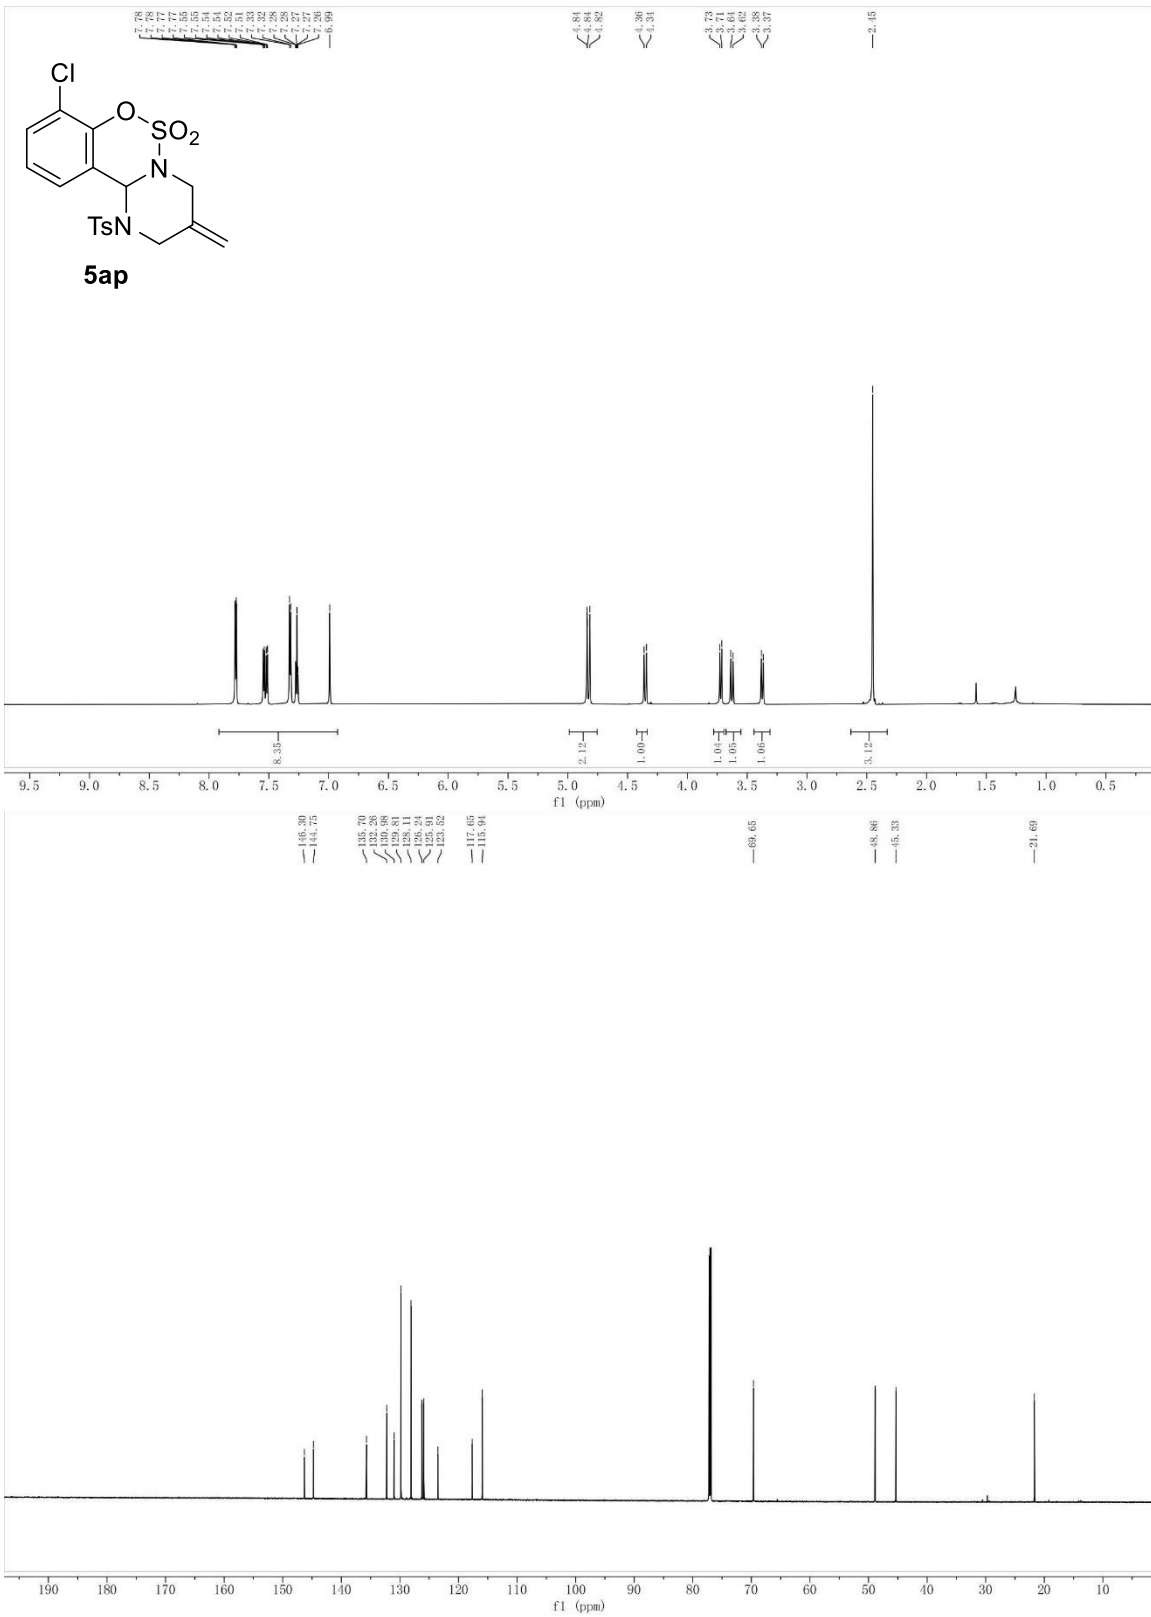



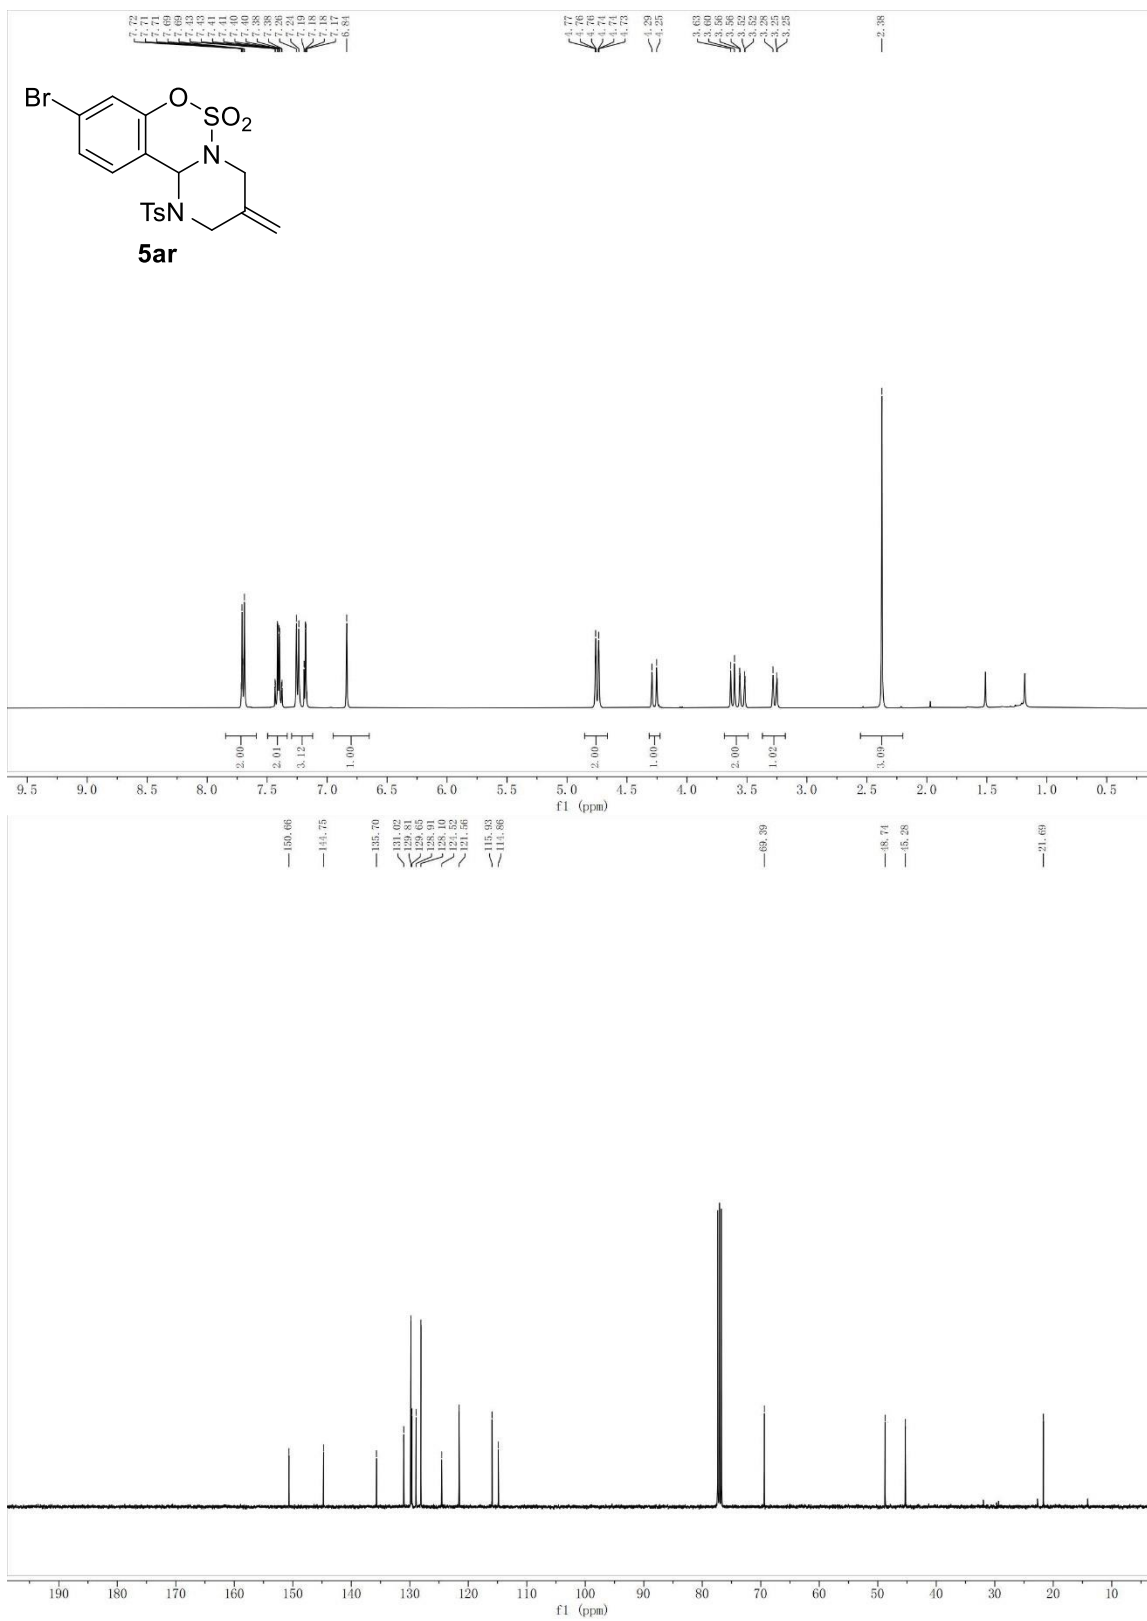

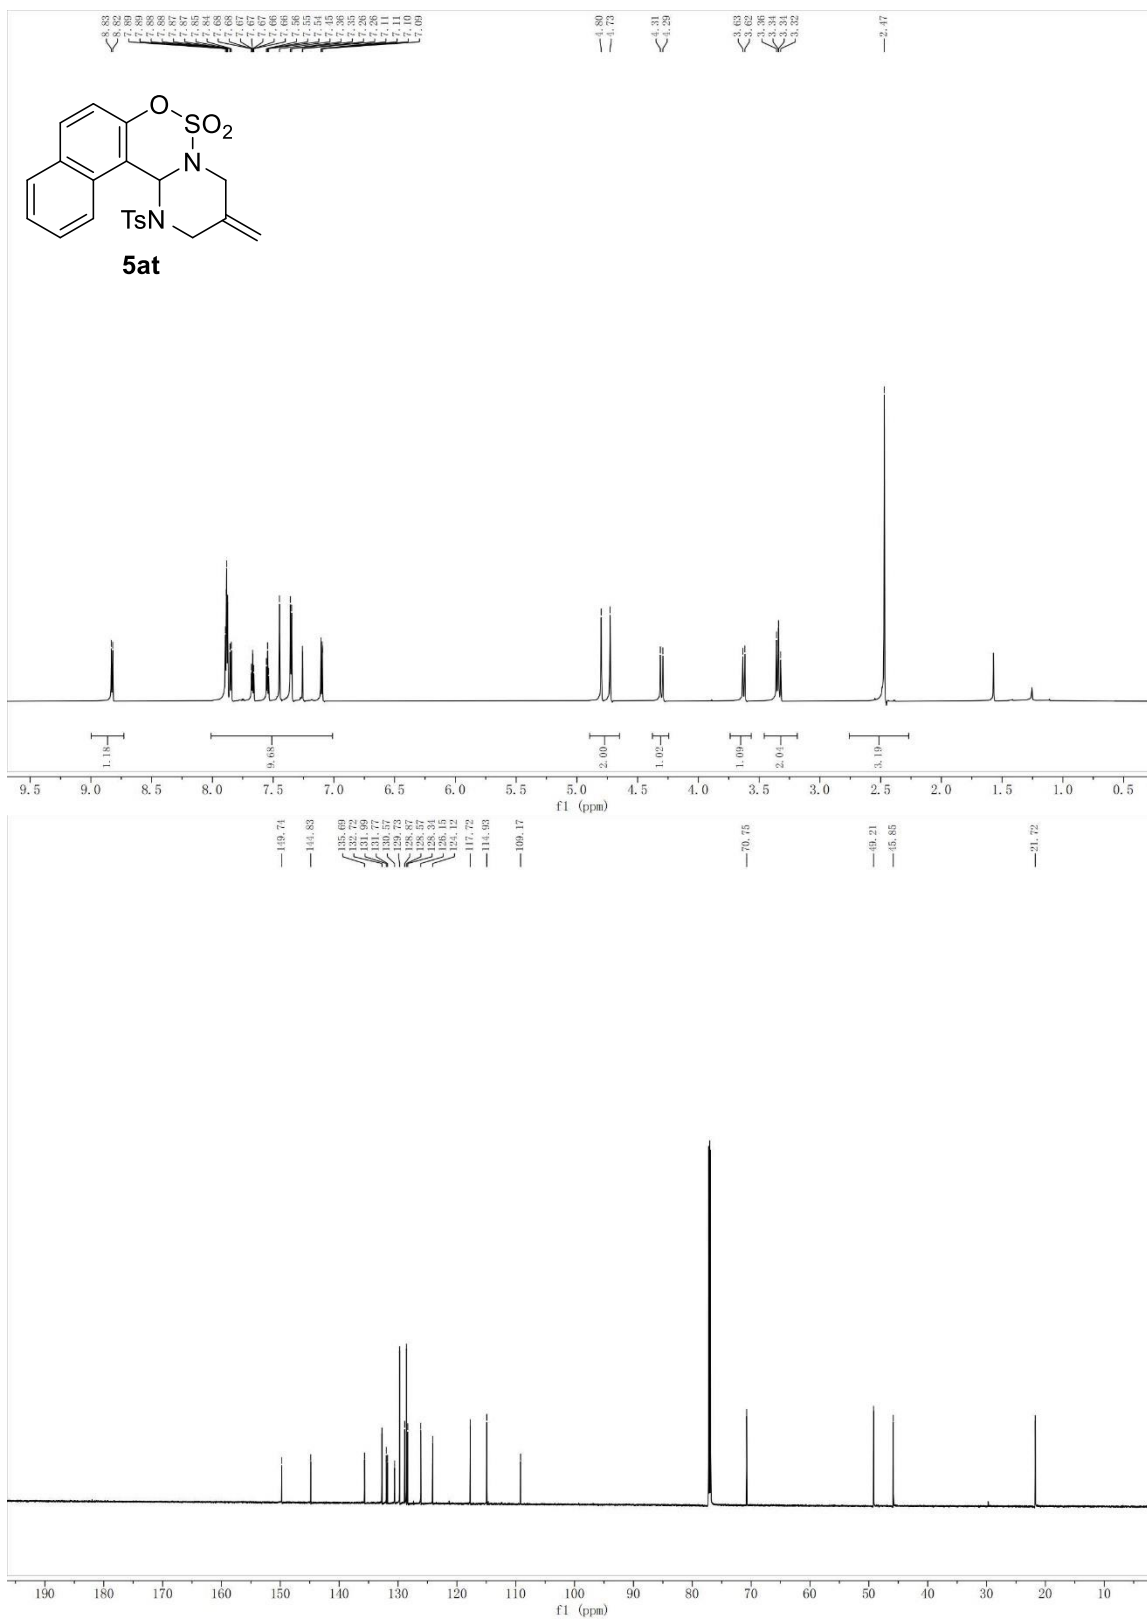

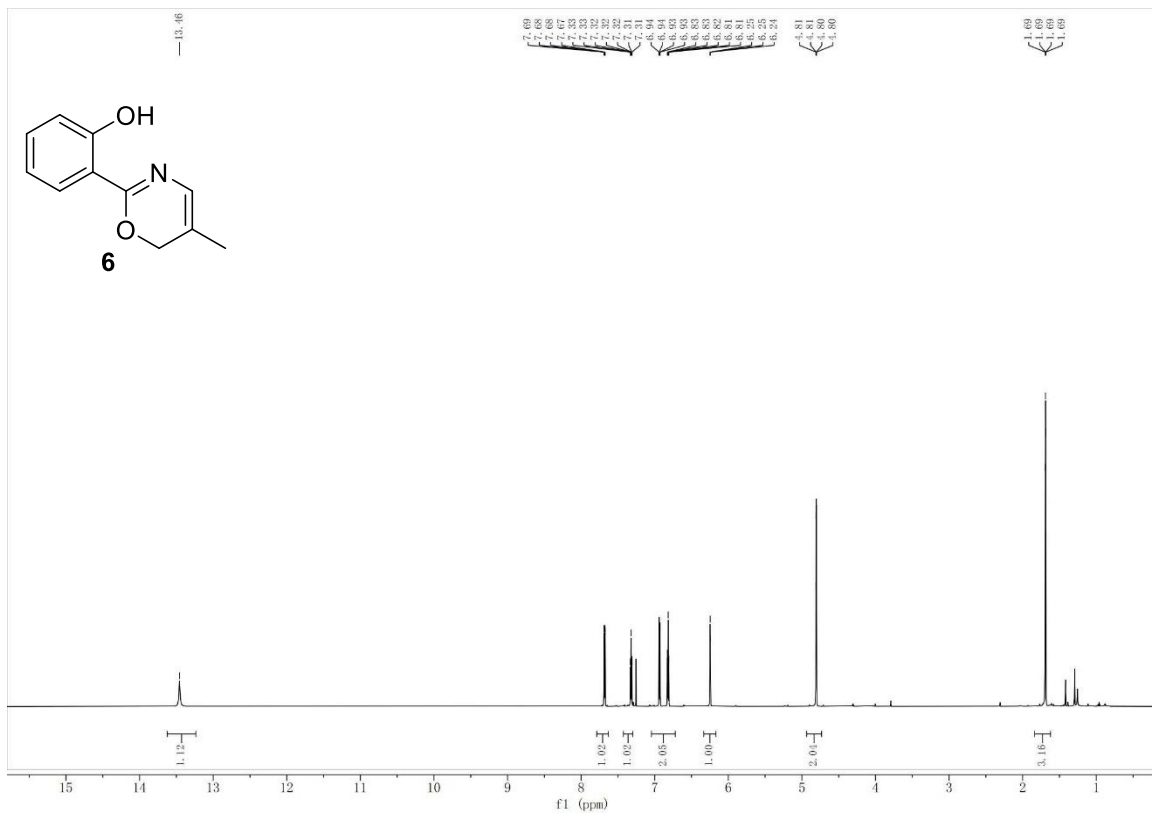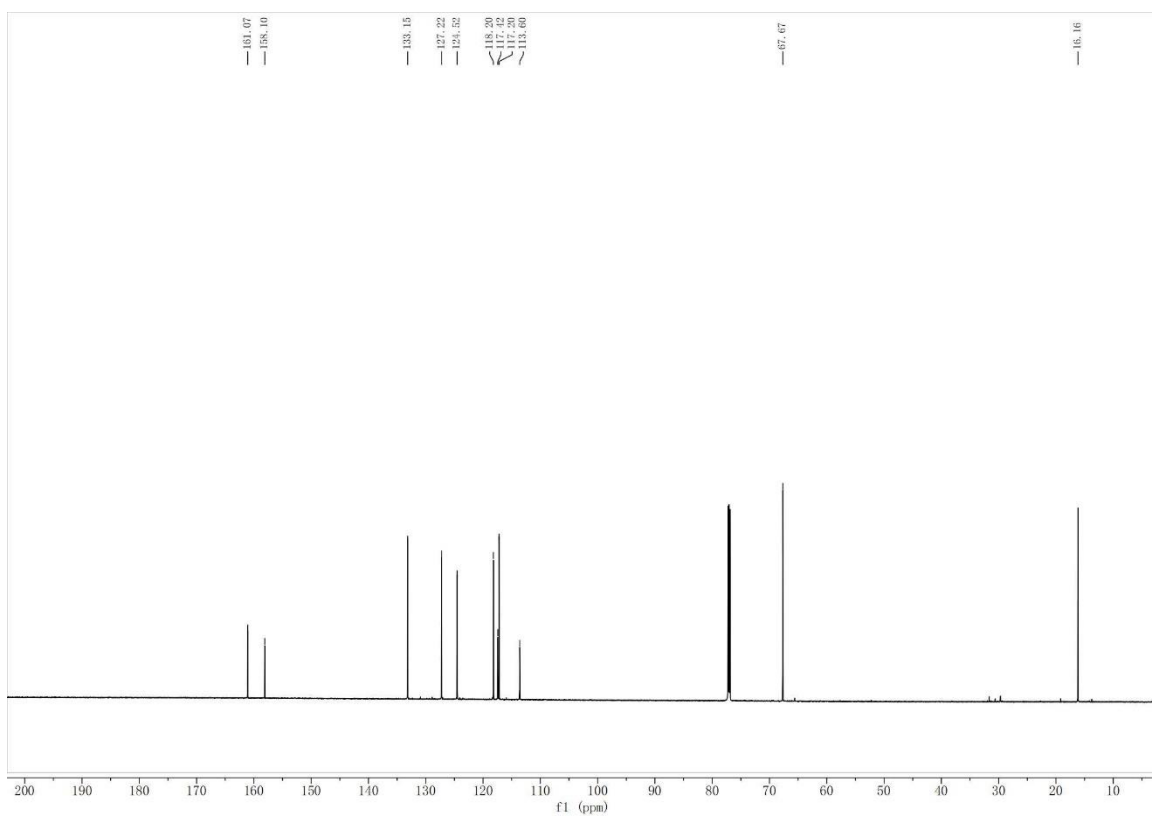

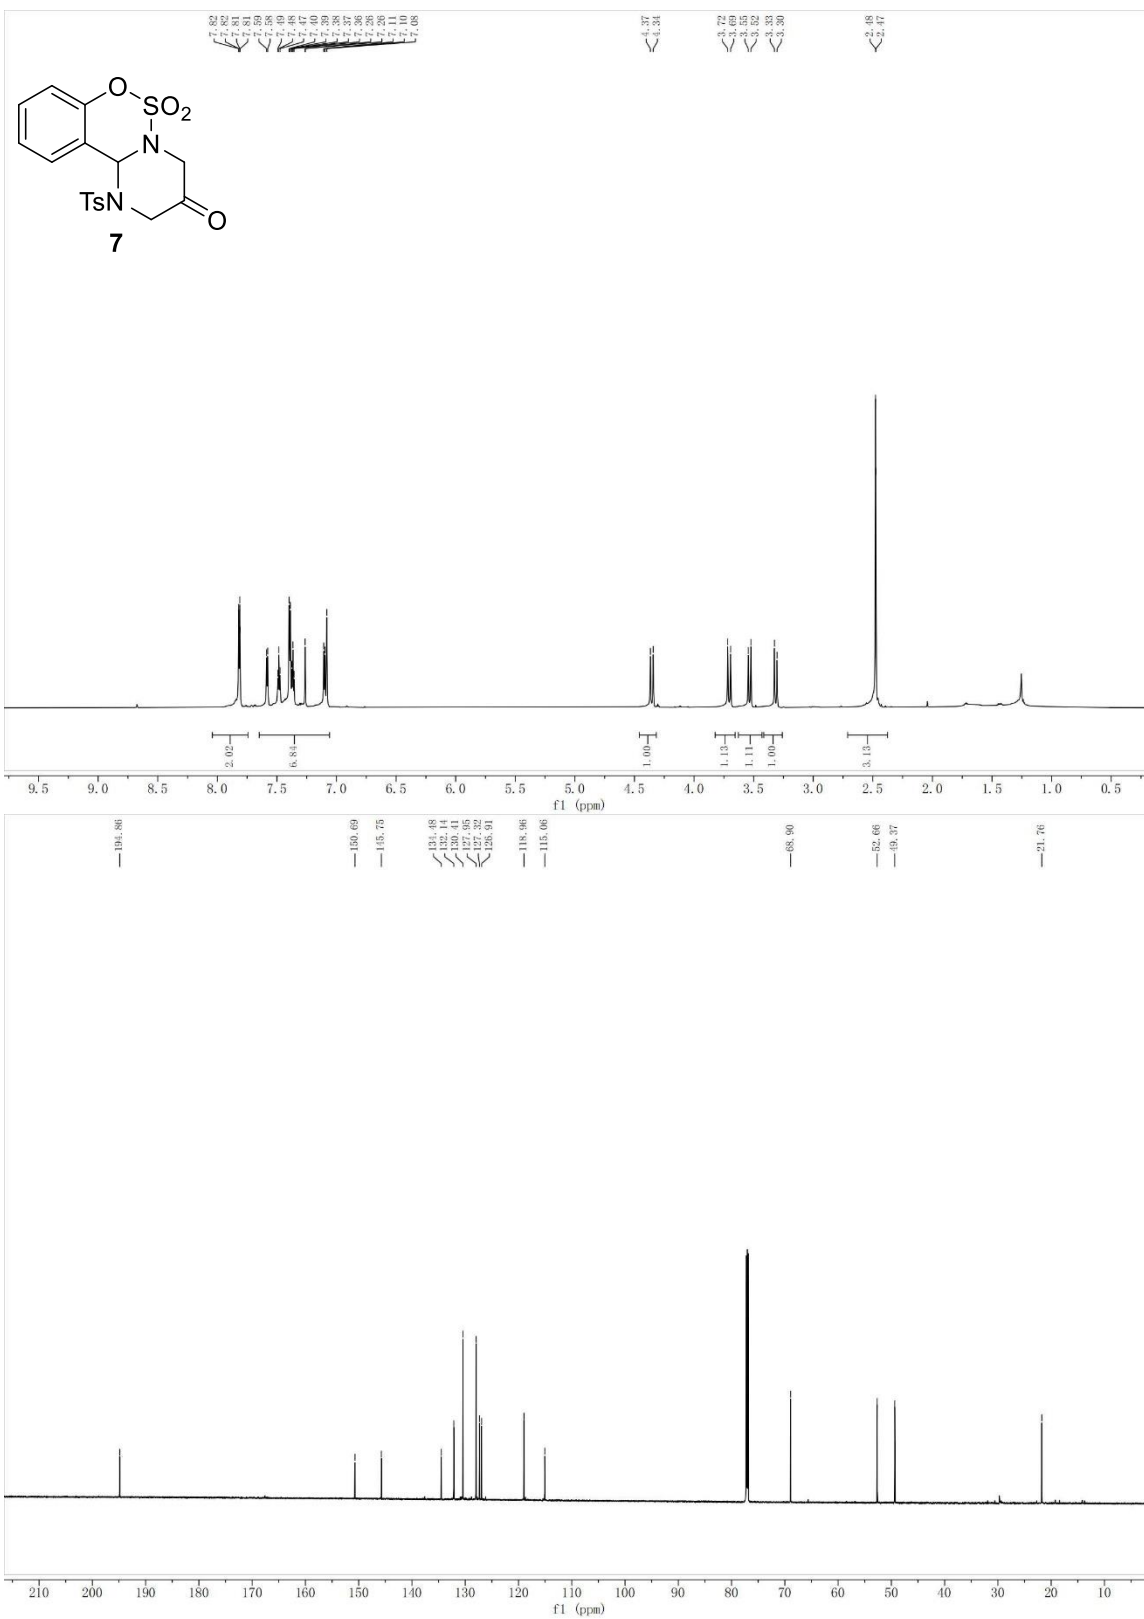

## X-Ray Crystallographic Data of **3aa**

Crystallographic data for **3aa** have been deposited with the Cambridge Crystallographic Data Centre as deposition number CCDC 2278928. These data can be obtained free of charge via [www.ccdc.cam.ac.uk/data\\_request/cif](http://www.ccdc.cam.ac.uk/data_request/cif), or by emailing [data\\_request@ccdc.cam.ac.uk](mailto:data_request@ccdc.cam.ac.uk), or by contacting The Cambridge Crystallographic Data Centre, 12, Union Road, Cambridge CB2 1EZ, UK; fax: +44 1223 336033.

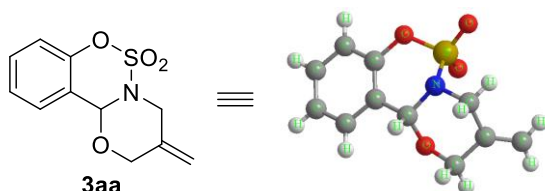

Table 1. Crystal data and structure refinement for **3aa**.

|                                 |                                                                                                                   |
|---------------------------------|-------------------------------------------------------------------------------------------------------------------|
| Identification code             | 3aa                                                                                                               |
| Empirical formula               | C <sub>11</sub> H <sub>11</sub> NO <sub>4</sub> S                                                                 |
| Formula weight                  | 253.27                                                                                                            |
| Temperature                     | 298(2) K                                                                                                          |
| Wavelength                      | 0.71073 Å                                                                                                         |
| Crystal system, space group     | Orthorhombic, Pbc <sub>a</sub>                                                                                    |
| Unit cell dimensions            | a = 12.9083(11) Å    alpha = 90 deg.<br>b = 8.1492(7) Å    beta = 90 deg.<br>c = 20.8706(18) Å    gamma = 90 deg. |
| Volume                          | 2195.4(3) Å <sup>3</sup>                                                                                          |
| Z, Calculated density           | 8, 1.533 Mg/m <sup>3</sup>                                                                                        |
| Absorption coefficient          | 0.297 mm <sup>-1</sup>                                                                                            |
| F(000)                          | 1056                                                                                                              |
| Crystal size                    | 0.45 x 0.33 x 0.14 mm                                                                                             |
| Theta range for data collection | 2.51 to 25.02 deg.                                                                                                |
| Limiting indices                | -14 ≤ h ≤ 15, -9 ≤ k ≤ 9, -24 ≤ l ≤ 18                                                                            |
| Reflections collected / unique  | 10188 / 1931 [R(int) = 0.1011]                                                                                    |
| Completeness to theta = 25.02   | 99.8 %                                                                                                            |
| Absorption correction           | Semi-empirical from equivalents                                                                                   |
| Max. and min. transmission      | 0.9596 and 0.8780                                                                                                 |



Refinement method            Full-matrix least-squares on F<sup>2</sup>  
 Data / restraints / parameters    1931 / 0 / 154  
 Goodness-of-fit on F<sup>2</sup>            1.048  
 Final R indices [I>2sigma(I)]    R1 = 0.0592, wR2 = 0.1499  
 R indices (all data)            R1 = 0.0880, wR2 = 0.1648  
 Largest diff. peak and hole    0.306 and -0.424 e.A<sup>-3</sup>

Table 2. Atomic coordinates ( x 10<sup>4</sup>) and equivalent isotropic displacement parameters (A<sup>2</sup> x 10<sup>3</sup>) for 3aa.

U(eq) is defined as one third of the trace of the orthogonalized Uij tensor.

|       | x       | y        | z       | U(eq) |
|-------|---------|----------|---------|-------|
| N(1)  | 6043(2) | -486(3)  | 6548(1) | 34(1) |
| O(1)  | 5544(2) | 885(4)   | 5574(1) | 56(1) |
| O(2)  | 7667(2) | 627(3)   | 6876(1) | 40(1) |
| O(3)  | 5682(2) | 2555(3)  | 6523(1) | 52(1) |
| O(4)  | 4294(2) | 593(4)   | 6389(1) | 62(1) |
| S(1)  | 5332(1) | 1008(1)  | 6308(1) | 41(1) |
| C(1)  | 6584(3) | 970(5)   | 5387(2) | 41(1) |
| C(2)  | 6776(3) | 1631(6)  | 4800(2) | 56(1) |
| C(3)  | 7775(4) | 1767(6)  | 4601(2) | 66(1) |
| C(4)  | 8564(4) | 1260(6)  | 4981(2) | 64(1) |
| C(5)  | 8362(3) | 564(5)   | 5568(2) | 51(1) |
| C(6)  | 7352(3) | 402(4)   | 5777(2) | 36(1) |
| C(7)  | 7151(3) | -341(4)  | 6416(2) | 34(1) |
| C(8)  | 7569(3) | -81(6)   | 7500(2) | 54(1) |
| C(9)  | 6463(3) | -177(5)  | 7683(2) | 46(1) |
| C(10) | 5835(3) | -1092(5) | 7206(2) | 41(1) |
| C(11) | 6085(4) | 447(6)   | 8197(2) | 74(2) |

---

Table 3. Bond lengths [Å] and angles [deg] for 3aa.

---

|            |          |
|------------|----------|
| N(1)-C(7)  | 1.461(4) |
| N(1)-C(10) | 1.484(4) |
| N(1)-S(1)  | 1.604(3) |
| O(1)-C(1)  | 1.400(4) |
| O(1)-S(1)  | 1.560(3) |
| O(2)-C(7)  | 1.410(4) |
| O(2)-C(8)  | 1.430(4) |
| O(3)-S(1)  | 1.412(3) |
| O(4)-S(1)  | 1.392(3) |
| C(1)-C(2)  | 1.360(5) |
| C(1)-C(6)  | 1.363(5) |
| C(2)-C(3)  | 1.360(5) |
| C(2)-H(2)  | 0.9300   |
| C(3)-C(4)  | 1.356(6) |
| C(3)-H(3)  | 0.9300   |
| C(4)-C(5)  | 1.374(5) |
| C(4)-H(4)  | 0.9300   |
| C(5)-C(6)  | 1.381(5) |
| C(5)-H(5)  | 0.9300   |
| C(6)-C(7)  | 1.489(5) |
| C(7)-H(7)  | 0.9800   |
| C(8)-C(9)  | 1.480(5) |
| C(8)-H(8A) | 0.9700   |
| C(8)-H(8B) | 0.9700   |
| C(9)-C(11) | 1.283(6) |
| C(9)-C(10) | 1.485(5) |

|                 |            |
|-----------------|------------|
| C(10)-H(10A)    | 0.9700     |
| C(10)-H(10B)    | 0.9700     |
| C(11)-H(11A)    | 0.9300     |
| C(11)-H(11B)    | 0.9300     |
| C(7)-N(1)-C(10) | 112.2(3)   |
| C(7)-N(1)-S(1)  | 116.1(2)   |
| C(10)-N(1)-S(1) | 115.9(2)   |
| C(1)-O(1)-S(1)  | 116.1(2)   |
| C(7)-O(2)-C(8)  | 110.6(3)   |
| O(4)-S(1)-O(3)  | 119.08(18) |
| O(4)-S(1)-O(1)  | 105.78(16) |
| O(3)-S(1)-O(1)  | 108.24(16) |
| O(4)-S(1)-N(1)  | 109.16(17) |
| O(3)-S(1)-N(1)  | 113.35(15) |
| O(1)-S(1)-N(1)  | 99.05(15)  |
| C(2)-C(1)-C(6)  | 122.6(4)   |
| C(2)-C(1)-O(1)  | 116.5(3)   |
| C(6)-C(1)-O(1)  | 120.9(3)   |
| C(3)-C(2)-C(1)  | 118.8(4)   |
| C(3)-C(2)-H(2)  | 120.6      |
| C(1)-C(2)-H(2)  | 120.6      |
| C(4)-C(3)-C(2)  | 120.6(4)   |
| C(4)-C(3)-H(3)  | 119.7      |
| C(2)-C(3)-H(3)  | 119.7      |
| C(3)-C(4)-C(5)  | 120.3(4)   |
| C(3)-C(4)-H(4)  | 119.8      |
| C(5)-C(4)-H(4)  | 119.8      |
| C(4)-C(5)-C(6)  | 120.0(4)   |
| C(4)-C(5)-H(5)  | 120.0      |
| C(6)-C(5)-H(5)  | 120.0      |

|                     |          |
|---------------------|----------|
| C(1)-C(6)-C(5)      | 117.8(3) |
| C(1)-C(6)-C(7)      | 123.1(3) |
| C(5)-C(6)-C(7)      | 119.1(3) |
| O(2)-C(7)-N(1)      | 112.4(3) |
| O(2)-C(7)-C(6)      | 107.5(3) |
| N(1)-C(7)-C(6)      | 111.8(3) |
| O(2)-C(7)-H(7)      | 108.3    |
| N(1)-C(7)-H(7)      | 108.3    |
| C(6)-C(7)-H(7)      | 108.3    |
| O(2)-C(8)-C(9)      | 109.9(3) |
| O(2)-C(8)-H(8A)     | 109.7    |
| C(9)-C(8)-H(8A)     | 109.7    |
| O(2)-C(8)-H(8B)     | 109.7    |
| C(9)-C(8)-H(8B)     | 109.7    |
| H(8A)-C(8)-H(8B)    | 108.2    |
| C(11)-C(9)-C(8)     | 124.1(4) |
| C(11)-C(9)-C(10)    | 123.5(4) |
| C(8)-C(9)-C(10)     | 112.4(3) |
| N(1)-C(10)-C(9)     | 110.8(3) |
| N(1)-C(10)-H(10A)   | 109.5    |
| C(9)-C(10)-H(10A)   | 109.5    |
| N(1)-C(10)-H(10B)   | 109.5    |
| C(9)-C(10)-H(10B)   | 109.5    |
| H(10A)-C(10)-H(10B) | 108.1    |
| C(9)-C(11)-H(11A)   | 120.0    |
| C(9)-C(11)-H(11B)   | 120.0    |
| H(11A)-C(11)-H(11B) | 120.0    |

---

Symmetry transformations used to generate equivalent atoms:

Table 4. Anisotropic displacement parameters ( $\text{\AA}^2 \times 10^3$ ) for 3aa.

The anisotropic displacement factor exponent takes the form:  $-2 \pi^2 [ h^2 a^2 U_{11} + \dots + 2 h k a^* b^* U_{12} ]$

|       | U11    | U22   | U33   | U23   | U13    | U12    |
|-------|--------|-------|-------|-------|--------|--------|
| N(1)  | 34(2)  | 33(2) | 35(2) | 0(1)  | 0(1)   | -3(1)  |
| O(1)  | 40(2)  | 93(2) | 34(2) | 5(2)  | -4(1)  | -2(1)  |
| O(2)  | 39(1)  | 40(2) | 40(1) | 4(1)  | -10(1) | -10(1) |
| O(3)  | 58(2)  | 41(2) | 58(2) | 1(1)  | 8(1)   | 12(1)  |
| O(4)  | 33(2)  | 99(3) | 53(2) | 18(2) | 1(1)   | 3(2)   |
| S(1)  | 32(1)  | 56(1) | 36(1) | 8(1)  | 1(1)   | 6(1)   |
| C(1)  | 43(2)  | 49(2) | 32(2) | 1(2)  | 3(2)   | 1(2)   |
| C(2)  | 67(3)  | 67(3) | 34(2) | 5(2)  | 5(2)   | 7(2)   |
| C(3)  | 74(3)  | 77(4) | 48(3) | 13(2) | 23(2)  | 2(3)   |
| C(4)  | 58(3)  | 70(3) | 63(3) | 6(3)  | 22(2)  | -1(2)  |
| C(5)  | 41(2)  | 53(3) | 60(3) | 7(2)  | 6(2)   | -1(2)  |
| C(6)  | 41(2)  | 30(2) | 36(2) | -5(2) | 7(2)   | -2(2)  |
| C(7)  | 34(2)  | 29(2) | 39(2) | 1(2)  | -1(2)  | 2(1)   |
| C(8)  | 58(3)  | 58(3) | 44(2) | 16(2) | -21(2) | -13(2) |
| C(9)  | 60(3)  | 48(3) | 31(2) | 14(2) | -4(2)  | -10(2) |
| C(10) | 46(2)  | 37(2) | 41(2) | 13(2) | 2(2)   | -6(2)  |
| C(11) | 107(4) | 71(4) | 45(3) | -1(2) | 7(3)   | -28(3) |

Table 5. Hydrogen coordinates (  $\times 10^4$ ) and isotropic displacement parameters ( $\text{Å}^2 \times 10^3$ ) for 3aa.

|      | x    | y    | z    | U(eq) |
|------|------|------|------|-------|
| H(2) | 6235 | 1984 | 4541 | 67    |
| H(3) | 7919 | 2210 | 4200 | 79    |

|        |      |       |      |    |
|--------|------|-------|------|----|
| H(4)   | 9246 | 1385  | 4845 | 76 |
| H(5)   | 8905 | 203   | 5824 | 61 |
| H(7)   | 7455 | -1443 | 6422 | 41 |
| H(8A)  | 7942 | 584   | 7810 | 64 |
| H(8B)  | 7870 | -1172 | 7502 | 64 |
| H(10A) | 6000 | -2252 | 7231 | 50 |
| H(10B) | 5105 | -960  | 7304 | 50 |
| H(11A) | 6515 | 1002  | 8481 | 89 |
| H(11B) | 5382 | 345   | 8284 | 89 |

---

Table 6. Torsion angles [deg] for 3aa.

---

|                      |           |
|----------------------|-----------|
| C(1)-O(1)-S(1)-O(4)  | -169.2(3) |
| C(1)-O(1)-S(1)-O(3)  | 62.1(3)   |
| C(1)-O(1)-S(1)-N(1)  | -56.3(3)  |
| C(7)-N(1)-S(1)-O(4)  | 172.0(2)  |
| C(10)-N(1)-S(1)-O(4) | -53.1(3)  |
| C(7)-N(1)-S(1)-O(3)  | -52.7(3)  |
| C(10)-N(1)-S(1)-O(3) | 82.2(3)   |
| C(7)-N(1)-S(1)-O(1)  | 61.8(3)   |
| C(10)-N(1)-S(1)-O(1) | -163.4(2) |
| S(1)-O(1)-C(1)-C(2)  | -149.8(3) |
| S(1)-O(1)-C(1)-C(6)  | 30.7(5)   |
| C(6)-C(1)-C(2)-C(3)  | -1.6(7)   |
| O(1)-C(1)-C(2)-C(3)  | 178.9(4)  |
| C(1)-C(2)-C(3)-C(4)  | -0.4(7)   |
| C(2)-C(3)-C(4)-C(5)  | 1.6(7)    |
| C(3)-C(4)-C(5)-C(6)  | -1.0(7)   |
| C(2)-C(1)-C(6)-C(5)  | 2.1(6)    |

|                       |           |
|-----------------------|-----------|
| O(1)-C(1)-C(6)-C(5)   | -178.3(3) |
| C(2)-C(1)-C(6)-C(7)   | -179.3(4) |
| O(1)-C(1)-C(6)-C(7)   | 0.2(6)    |
| C(4)-C(5)-C(6)-C(1)   | -0.8(6)   |
| C(4)-C(5)-C(6)-C(7)   | -179.4(4) |
| C(8)-O(2)-C(7)-N(1)   | 60.6(4)   |
| C(8)-O(2)-C(7)-C(6)   | -175.9(3) |
| C(10)-N(1)-C(7)-O(2)  | -54.1(4)  |
| S(1)-N(1)-C(7)-O(2)   | 82.4(3)   |
| C(10)-N(1)-C(7)-C(6)  | -175.1(3) |
| S(1)-N(1)-C(7)-C(6)   | -38.6(4)  |
| C(1)-C(6)-C(7)-O(2)   | -119.7(4) |
| C(5)-C(6)-C(7)-O(2)   | 58.8(4)   |
| C(1)-C(6)-C(7)-N(1)   | 4.1(5)    |
| C(5)-C(6)-C(7)-N(1)   | -177.4(3) |
| C(7)-O(2)-C(8)-C(9)   | -60.7(4)  |
| O(2)-C(8)-C(9)-C(11)  | -124.7(4) |
| O(2)-C(8)-C(9)-C(10)  | 55.7(4)   |
| C(7)-N(1)-C(10)-C(9)  | 47.6(4)   |
| S(1)-N(1)-C(10)-C(9)  | -89.0(3)  |
| C(11)-C(9)-C(10)-N(1) | 131.3(4)  |
| C(8)-C(9)-C(10)-N(1)  | -49.1(4)  |

---

Symmetry transformations used to generate equivalent atoms:

Table 7. Hydrogen bonds for 3aa [A and deg.].

---

| D-H...A | d(D-H) | d(H...A) | d(D...A) | <(DHA) |
|---------|--------|----------|----------|--------|
|---------|--------|----------|----------|--------|
